# Supplementary material for: The Improved para-Selective C(sp2)-H Borylation of Anisole Derivatives Enabled by Bulky Lewis Acid
Source: MDPI journal article supplement (doi:10.3390/catal13081193), 2023-08-09

# Supplementary Materials

## The Improved *para*-selective C(sp<sup>2</sup>)-H Borylation of Anisole Derivatives Enabled by Bulky Lewis Acid

Dai-Yu Li <sup>1,2</sup>, Rui-Mu Yu <sup>1,2</sup>, Jin-Ping Li <sup>1,2</sup>, Deng-Feng Yang <sup>2</sup>, Qi Pang <sup>1,\*</sup> and Hong-Liang Li <sup>2,\*</sup>

<sup>1</sup> School of Chemistry and Chemical Engineering, Guangxi University, Daxue Road, Nanning 53004, China; 2114391039@st.gxu.edu.cn (D.-Y.L.); 2114391125@st.gxu.edu.cn (R.-M.Y.); 2214301040@st.gxu.edu.cn (J.-P.L.)

<sup>2</sup> Guangxi Key Laboratory of Marine Natural Products and Combinatorial Biosynthesis Chemistry, Guangxi Academic of Marine Sciences, Guangxi Academy of Sciences, Nanning 53007, China; dengfengyang@163.com

\* Correspondence: qipang@gxu.edu.cn (Q.P.); hongliang-li@gxas.cn (H.-L.L.)

## Table of Contents

|                                                                                     |    |
|-------------------------------------------------------------------------------------|----|
| 1. General Information .....                                                        | S3 |
| 2. Optimization of Reaction Condition .....                                         | S3 |
| 3. General procedure for para-selective C-H borylation of anisole derivatives ..... | S4 |
| 4. $^1\text{H}$ -NMR and $^{13}\text{C}$ -NMR Spectrum .....                        | S9 |

## 1. General information

All reactions were carried out in a dry and degassed solvent under N<sub>2</sub> atmosphere. Compounds B(Mes)<sub>3</sub>, B<sub>2</sub>Pin<sub>2</sub>, [Ir(OMe)(cod)]<sub>2</sub>, were purchased from Aldrich and Bide Pharmatech, and used without further purification unless otherwise noted. Anhydrous solvents such as cyclohexane and tetrahydrofuran were distilled and degassed refluxing over CaH<sub>2</sub> or the combination of sodium/benzophenone ketyl. Reactions were monitored by thin-layer chromatography (TLC) visualizing with UV-light (254 nm). Organic solutions were concentrated under reduced pressure using a rotary evaporator (30 °C, <50 torr). NMR spectra were recorded on 400 MHz (400 MHz for <sup>1</sup>H NMR, 100 MHz for <sup>13</sup>C NMR), and 800 MHz (800 MHz for <sup>1</sup>H NMR, 201 MHz for <sup>13</sup>C NMR) spectrometers. Proton and carbon chemical shifts are reported relative to the solvent used as an internal reference. The boron-bearing carbon atom was not observed due to quadrupolar relaxation. ESI-MS spectra were measured on a spectrometer for HRMS.

## 2. Optimization of reaction condition

**Tabel S1.** Screening of the loading amount of Lewis acid and reaction temperature

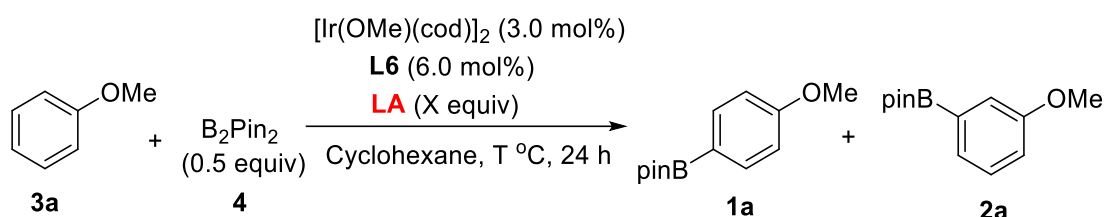

| Entry | B(Mes) <sub>3</sub> (X eq.) | T °C   | Yield(%) |     | Ratio<br>(para : meta) |
|-------|-----------------------------|--------|----------|-----|------------------------|
|       |                             |        | 1a       | 2a  |                        |
| 1     | --                          | 40 °C  | 15%      | 33% | 32 : 68                |
| 2     | 0.5                         | 40 °C  | 30%      | 11% | 72 : 28                |
| 3     | 1.0                         | 40 °C  | 46%      | 8%  | 84 : 16                |
| 4     | 1.5                         | 40 °C  | 39%      | 11% | 79 : 21                |
| 5     | 1.0                         | 60 °C  | 44%      | 17% | 73 : 27                |
| 6     | 1.0                         | 80 °C  | 28%      | 32% | 47 : 53                |
| 7     | 1.0                         | 100 °C | 22%      | 33% | 41 : 59                |

[a] Yields and selectivities were calculated by <sup>1</sup>H-NMR with 1,2-dichloromethane as internal standard

**Tabel S2.** Screening of different solvents

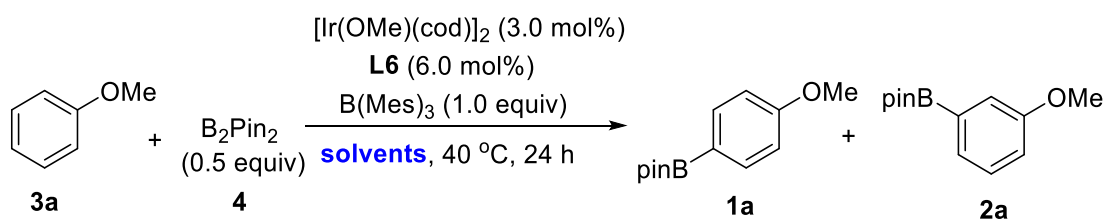

| Entry | solvent                         | Yield(%) |     | Ratio<br>(para : meta) |
|-------|---------------------------------|----------|-----|------------------------|
|       |                                 | 1a       | 2a  |                        |
| 1     | hexane                          | 30%      | 8%  | 80 : 20                |
| 2     | p-xylene                        | 37%      | 10% | 78 : 22                |
| 3     | THF                             | 34%      | 23% | 60 : 40                |
| 4     | diethylether                    | 29%      | 14% | 67 : 33                |
| 5     | EtOAc                           | trace    | --  | --                     |
| 6     | CH <sub>2</sub> Cl <sub>2</sub> | --       | --  | --                     |
| 7     | 1,2-dichloroethane              | --       | --  | --                     |

[a] Yields and selectivities were calculated by <sup>1</sup>H-NMR with 1,2-dichloromethane as internal standard

### 3. General procedure for *para*-selective C-H borylation of anisole derivatives (1a-1x)

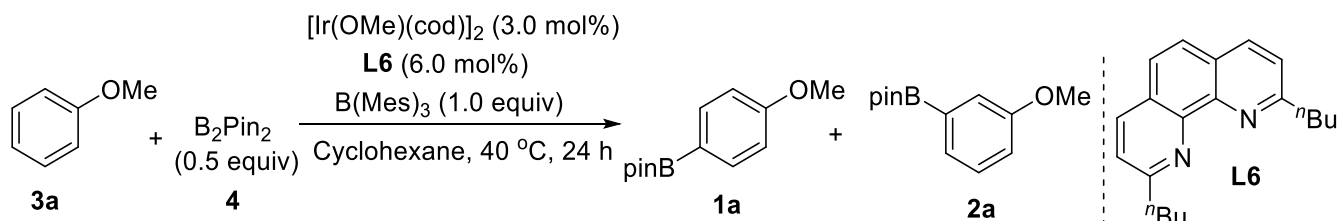

#### methyl 2-methoxy-5-(4,4,5,5-tetramethyl-1,3,2-dioxaborolan-2-yl)benzoate (1l + 2l)

The mixture of product (90 mg, 63% yield, *para/meta* = 60 : 40); *para*-borylated product **1l** was obtained by further purification of the crude mixture by GPC (54 mg); the data of **1l**: <sup>1</sup>H NMR (800 MHz, CDCl<sub>3</sub>) δ 8.22 (s, 1H), 7.90 (d, *J* = 8.3 Hz, 1H), 6.96 (d, *J* = 8.4 Hz, 1H), 3.92 (s, 3H), 3.88 (s, 3H), 1.33 (s, 12H); <sup>13</sup>C NMR (201 MHz, CDCl<sub>3</sub>) δ 166.5, 161.4, 140.2, 138.3, 119.6, 111.1, 83.8, 55.9, 51.9, 24.8; the data of **2l**: <sup>1</sup>H NMR (800 MHz, CDCl<sub>3</sub>) δ 7.75 (d, *J* = 7.6 Hz, 1H), 7.40 (d, *J* = 7.6 Hz, 1H), 7.37 (s, 1H), 3.93 (s, 3H), 3.88 (d, *J* = 1.4 Hz, 3H), 1.34 (s, 12H); <sup>13</sup>C NMR (201 MHz, CDCl<sub>3</sub>) δ 166.7, 158.2, 130.7, 126.4, 122.3, 117.5, 84.2, 56.0, 52.0, 24.8; IR (KBr, ν / cm<sup>-1</sup>) 1728, 1358, 1232, 1145, 1085, 972, 853, 683; HRMS (ESI<sup>+</sup>) Calcd for C<sub>15</sub>H<sub>22</sub>BO<sub>5</sub><sup>+</sup> ([M+H]<sup>+</sup>) 293.1555, Found 293.1561.

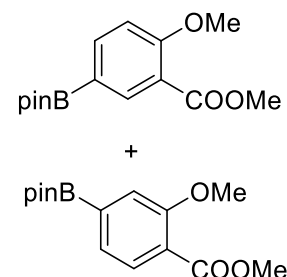

### 2-methoxy-N,N-dimethyl-5-(4,4,5,5-tetramethyl-1,3,2-dioxaborolan-2-yl)benzamide (1m + 2m)

The mixture of product (64 mg, 42% yield, *para/meta* = 68 : 32); *para*-borylated product **1m** was obtained by further purification of the crude mixture by GPC (46 mg); the data of **1m**:  $^1\text{H}$  NMR (800 MHz,  $\text{CDCl}_3$ )  $\delta$  7.77 (d,  $J$  = 8.3 Hz, 1H), 7.68 (s, 1H), 6.89 (d,  $J$  = 8.3 Hz, 1H), 3.84 (s, 3H), 3.09 (s, 3H), 2.83 (s, 3H), 1.31 (s, 12H);  $^{13}\text{C}$  NMR (201 MHz,  $\text{CDCl}_3$ )  $\delta$  169.4, 157.7, 137.2, 134.5, 125.8, 110.1, 83.7, 55.5, 38.3, 34.7, 24.8; the data of **2m**:  $^1\text{H}$  NMR (800 MHz,  $\text{CDCl}_3$ )  $\delta$  7.42 (d,  $J$  = 7.4 Hz, 1H), 7.31 (s, 1H), 7.22 (d,  $J$  = 7.2 Hz, 1H), 3.87 (s, 3H), 3.10 (s, 3H), 2.81 (s, 3H), 1.34 (s, 12H);  $^{13}\text{C}$  NMR (201 MHz,  $\text{CDCl}_3$ )  $\delta$  169.3, 154.7, 129.1, 127.4, 127.2, 116.4, 84.0, 55.6, 38.1, 34.6, 24.8; IR (KBr,  $\nu$  /  $\text{cm}^{-1}$ ) 1633, 1507, 1387, 1236, 1141, 1028, 964, 852, 773, 689; HRMS ( $\text{ESI}^+$ ) Calcd for  $\text{C}_{16}\text{H}_{25}\text{BNO}_4^+$  ( $[\text{M}+\text{H}]^+$ ) 306.1871, Found 306.1868.

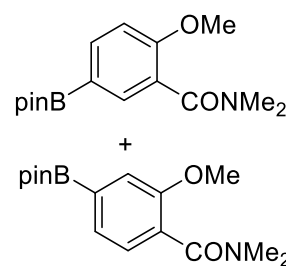

### 1-(2-methoxy-5-(4,4,5,5-tetramethyl-1,3,2-dioxaborolan-2-yl)phenyl)ethan-1-one (1n + 2n)

The mixture of product (78 mg, 57% yield, *para/meta* = 73 : 27); *para*-borylated product **1n** was obtained by further purification of the crude mixture by GPC (49 mg); the data of **1n**:  $^1\text{H}$  NMR (800 MHz,  $\text{CDCl}_3$ )  $\delta$  8.14 (d,  $J$  = 1.7 Hz, 1H), 7.89 (dd,  $J$  = 8.3, 1.7 Hz, 1H), 6.95 (d,  $J$  = 8.3 Hz, 1H), 3.93 (s, 3H), 2.59 (s, 3H), 1.33 (s, 12H);  $^{13}\text{C}$  NMR (201 MHz,  $\text{CDCl}_3$ )  $\delta$  200.1, 160.9, 140.2, 137.2, 128.1, 110.8, 83.8, 55.5, 31.6, 24.8; the data of **2n**:  $^1\text{H}$  NMR (800 MHz,  $\text{CDCl}_3$ )  $\delta$  7.67 (d,  $J$  = 7.6 Hz, 1H), 7.42 (d,  $J$  = 7.6 Hz, 1H), 7.37 (s, 1H), 3.94 (s, 3H), 2.60 (s, 3H), 1.34 (s, 12H);  $^{13}\text{C}$  NMR (201 MHz,  $\text{CDCl}_3$ )  $\delta$  200.3, 158.0, 130.5, 129.3, 126.8, 117.2, 84.2, 55.5, 31.8, 24.8; IR (KBr,  $\nu$  /  $\text{cm}^{-1}$ ) 1670, 1395, 1351, 1229, 1142, 1023, 966, 852, 687; HRMS ( $\text{ESI}^+$ ) Calcd for  $\text{C}_{15}\text{H}_{22}\text{BO}_4^+$  ( $[\text{M}+\text{H}]^+$ ) 277.1606, Found 277.1657.

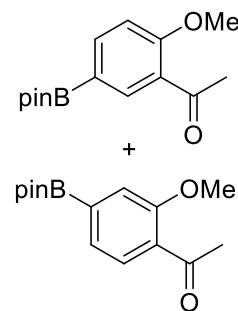

### 2-methoxy-5-(4,4,5,5-tetramethyl-1,3,2-dioxaborolan-2-yl)benzaldehyde (1o + 2o)

The mixture of product (68 mg, 52% yield, *para/meta* = 70 : 30); *para*-borylated product **1o** was obtained by further purification of the crude mixture by GPC (47 mg); the data of **1o**:  $^1\text{H}$  NMR (800 MHz,  $\text{CDCl}_3$ )  $\delta$  10.44 (s, 1H), 8.28 (s, 1H), 7.97 (d,  $J$  = 8.4 Hz, 1H), 6.97 (d,  $J$  = 8.4 Hz, 1H), 3.95 (s, 3H), 1.33 (s, 12H);  $^{13}\text{C}$  NMR (201 MHz,  $\text{CDCl}_3$ )  $\delta$  189.8, 163.8, 142.4, 136.4, 124.3, 110.9, 83.9, 55.7, 24.8; the data of **2o**:  $^1\text{H}$  NMR (800 MHz,  $\text{CDCl}_3$ )  $\delta$  10.50 (s, 1H), 7.80 (d,  $J$  = 7.5 Hz, 1H), 7.45 (d,  $J$  = 7.5 Hz, 1H), 7.40 (s, 1H), 3.97 (s, 3H), 1.36 (s, 12H);  $^{13}\text{C}$  NMR (201 MHz,  $\text{CDCl}_3$ )  $\delta$  190.2, 161.0, 127.5, 126.8, 117.4, 84.3, 55.7, 24.9; IR (KBr,  $\nu$  /  $\text{cm}^{-1}$ ) 1675, 1403, 1358, 1231, 1027, 906, 805, 685; HRMS ( $\text{ESI}^+$ ) Calcd for  $\text{C}_{14}\text{H}_{20}\text{BO}_4^+$  ( $[\text{M}+\text{H}]^+$ ) 263.1449, Found 263.1451.

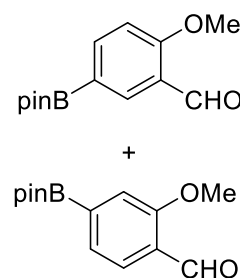

### 2-(3-(1,3-dioxolan-2-yl)-4-methoxyphenyl)-4,4,5,5-tetramethyl-1,3,2-dioxaborolane (**1p**)

The mixture of product (61 mg, 40% yield, *para/meta* = 80 : 20); *para*-borylated product **1p** was obtained by further purification of the crude mixture by GPC (49

mg);  $^1\text{H}$  NMR (800 MHz,  $\text{CDCl}_3$ )  $\delta$  7.98 (s, 1H), 7.79 (d,  $J$  = 8.3 Hz, 1H), 6.89 (d,  $J$  = 8.3 Hz, 1H), 6.15 (s, 1H), 4.17 – 4.14 (m, 2H), 4.04 – 4.01 (m, 2H), 3.88 (s, 3H), 1.32 (s, 12H);  $^{13}\text{C}$  NMR (201 MHz,  $\text{CDCl}_3$ )  $\delta$  160.2, 137.5, 133.7, 125.1, 109.9, 99.3, 83.5, 65.3, 55.5, 24.8; IR (KBr,  $\nu$  /  $\text{cm}^{-1}$ ) 1417, 1376, 1232, 1141, 1029, 967, 851, 692; HRMS ( $\text{ESI}^+$ ) Calcd for  $\text{C}_{16}\text{H}_{24}\text{BO}_5^+$  ( $[\text{M}+\text{H}]^+$ ) 307.1711, Found 307.1705.

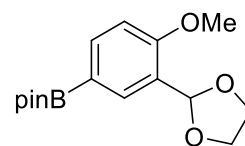

### 2,2'-(4-methoxy-1,3-phenylene)bis(4,4,5,5-tetramethyl-1,3,2-dioxaborolane) (**1q**)

The mixture of product (99 mg, 55% yield, *para/meta* = 82 : 18); *para*-borylated product **1q** was obtained by further purification of the crude mixture by GPC (81

mg);  $^1\text{H}$  NMR (800 MHz,  $\text{CDCl}_3$ )  $\delta$  8.11 (s, 1H), 7.85 (d,  $J$  = 8.3 Hz, 1H), 6.84 (d,  $J$  = 8.3 Hz, 1H), 3.84 (s, 3H), 1.35 (s, 13H), 1.33 (s, 12H);  $^{13}\text{C}$  NMR (201 MHz,  $\text{CDCl}_3$ )  $\delta$  166.6, 143.5, 139.6, 109.5, 83.5, 83.4, 55.6, 24.8, 24.7; IR (KBr,  $\nu$  /  $\text{cm}^{-1}$ ) 1596, 1357, 1318, 1249, 1139, 1025, 965, 849, 647; HRMS ( $\text{ESI}^+$ ) Calcd for  $\text{C}_{19}\text{H}_{31}\text{BO}_5^+$  ( $[\text{M}+\text{H}]^+$ ) 361.2352, Found 361.2348.

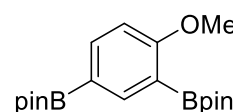

### 1-(2-methoxy-5-(4,4,5,5-tetramethyl-1,3,2-dioxaborolan-2-yl)phenyl)pyrrolidine (**1r**)

The mixture of product (71 mg, 47% yield, *para/meta* = 80 : 20); *para*-borylated product **1r** was obtained by further purification of the crude mixture by GPC (57

mg);  $^1\text{H}$  NMR (800 MHz,  $\text{CDCl}_3$ )  $\delta$  7.36 (d,  $J$  = 7.9 Hz, 1H), 7.24 (s, 1H), 6.85 (d,  $J$  = 8.0 Hz, 1H), 3.86 (s, 3H), 3.32 – 3.28 (m, 4H), 1.95 – 1.89 (m, 4H), 1.33 (s, 12H);  $^{13}\text{C}$  NMR (201 MHz,  $\text{CDCl}_3$ )  $\delta$  153.4, 139.3, 127.8, 121.6, 110.5, 83.4, 55.3, 50.6, 24.8, 24.6; IR (KBr,  $\nu$  /  $\text{cm}^{-1}$ ) 2927, 1414, 1354, 1234, 1138, 1022, 989, 849, 807, 684; HRMS ( $\text{ESI}^+$ ) Calcd for  $\text{C}_{17}\text{H}_{27}\text{BNO}_3^+$  ( $[\text{M}+\text{H}]^+$ ) 304.2079, Found 304.2082.

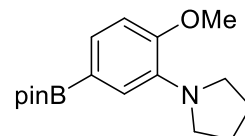

### 4-(2-methoxy-5-(4,4,5,5-tetramethyl-1,3,2-dioxaborolan-2-yl)phenyl)morpholine (**1s**)

The mixture of product (80 mg, 50% yield, *para/meta* = 79 : 21); *para*-borylated product **1s** was obtained by further purification of the crude mixture by GPC (63

mg);  $^1\text{H}$  NMR (800 MHz,  $\text{CDCl}_3$ )  $\delta$  7.51 (d,  $J$  = 8.0 Hz, 1H), 7.35 (s, 1H), 6.87 (d,  $J$  = 8.1 Hz, 1H), 3.91 – 3.87 (m, 7H), 3.09 (t,  $J$  = 4.6 Hz, 4H), 1.33 (s, 12H);  $^{13}\text{C}$  NMR (201 MHz,  $\text{CDCl}_3$ )  $\delta$  154.9, 140.4, 130.8, 124.0, 110.5, 83.6, 67.2, 55.4, 51.2, 24.8; IR (KBr,  $\nu$  /  $\text{cm}^{-1}$ ) 2918, 1645, 1457, 1353, 1236, 1097, 964, 852, 689; HRMS ( $\text{ESI}^+$ ) Calcd for  $\text{C}_{17}\text{H}_{27}\text{BNO}_4^+$  ( $[\text{M}+\text{H}]^+$ ) 320.2028, Found 320.2035.

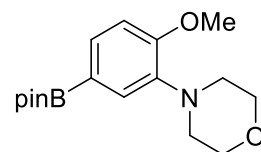

**2-(3,5-difluoro-4-methoxyphenyl)-4,4,5,5-tetramethyl-1,3,2-dioxaborolane (1t)**

The para-borylated product (88 mg, 65% yield, *para/meta* = 100/0); <sup>1</sup>H NMR (800 MHz, CDCl<sub>3</sub>) δ 7.31 (s, 1H), 7.30 (s, 1H), 4.03 (s, 4H), 1.33 (s, 12H); <sup>13</sup>C NMR (201 MHz, CDCl<sub>3</sub>) δ 155.7 (d, *J* = 6.0 Hz), 154.5 (d, *J* = 6.0 Hz), 118.1 (d, *J* = 4.0 Hz), 117.9 (d, *J* = 4.0 Hz), 84.3, 61.6, 24.8; IR (KBr, ν / cm<sup>-1</sup>) 1417, 1376, 1232, 1141, 1029, 967, 851, 692; HRMS (ESI<sup>+</sup>) Calcd for C<sub>13</sub>H<sub>18</sub>BF<sub>2</sub>O<sub>3</sub><sup>+</sup> ([M+H]<sup>+</sup>) 271.1312, Found 271.1299.

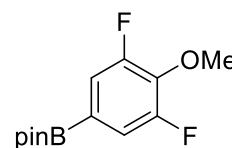**2-(4-methoxy-3,5-dimethylphenyl)-4,4,5,5-tetramethyl-1,3,2-dioxaborolane (1u)**

The para-borylated product (81 mg, 62% yield, *para/meta* = 100/0); <sup>1</sup>H NMR (800 MHz, CDCl<sub>3</sub>) δ 7.49 (s, 2H), 3.73 (s, 3H), 2.29 (s, 6H), 1.34 (s, 12H); <sup>13</sup>C NMR (201 MHz, CDCl<sub>3</sub>) δ 159.8, 135.6, 130.3, 83.6, 59.6, 24.8, 15.9; IR (KBr, ν / cm<sup>-1</sup>) 1603, 1339, 1212, 1012, 962, 850, 692; HRMS (ESI<sup>+</sup>) Calcd for C<sub>15</sub>H<sub>24</sub>BO<sub>3</sub><sup>+</sup> ([M+H]<sup>+</sup>) 263.1813, Found 263.1798.

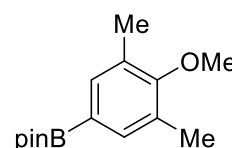**2-(2,3-dihydrobenzofuran-5-yl)-4,4,5,5-tetramethyl-1,3,2-dioxaborolane (1v)**

The mixture of product (69 mg, 56% yield, *para/meta* = 75 : 25); *para*-borylated product **1v** was obtained by further purification of the crude mixture by GPC (52 mg); <sup>1</sup>H NMR (800 MHz, CDCl<sub>3</sub>) δ 7.66 (s, 1H), 7.61 (d, *J* = 9.5 Hz, 1H), 6.79 (d, *J* = 8.0 Hz, 1H), 4.57 (t, *J* = 8.7 Hz, 2H), 3.19 (t, *J* = 8.7 Hz, 2H), 1.33 (s, 12H); <sup>13</sup>C NMR (201 MHz, CDCl<sub>3</sub>) δ 162.8, 135.5, 131.5, 126.5, 109.0, 83.5, 71.3, 29.2, 24.8; IR (KBr, ν / cm<sup>-1</sup>) 1417, 1376, 1232, 1141, 1029, 967, 851, 692; HRMS (ESI<sup>+</sup>) Calcd for C<sub>14</sub>H<sub>20</sub>BO<sub>3</sub><sup>+</sup> ([M+H]<sup>+</sup>) 247.1500, Found 247.1508.

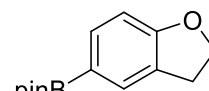**2-(chroman-6-yl)-4,4,5,5-tetramethyl-1,3,2-dioxaborolane (1w)**

The mixture of product (70 mg, 54% yield, *para/meta* = 71 : 29); *para*-borylated product **1w** was obtained by further purification of the crude mixture by GPC (50 mg); <sup>1</sup>H NMR (800 MHz, CDCl<sub>3</sub>) δ 7.53 (d, *J* = 8.0 Hz, 1H), 7.52 (s, 1H), 6.78 (d, *J* = 8.1 Hz, 1H), 4.22 – 4.18 (m, 2H), 2.79 (t, *J* = 6.5 Hz, 2H), 2.02 – 1.98 (m, 2H), 1.33 (s, 12H); <sup>13</sup>C NMR (201 MHz, CDCl<sub>3</sub>) δ 157.7, 136.9, 134.0, 121.6, 116.2, 83.5, 66.6, 24.8, 24.7, 22.3; IR (KBr, ν / cm<sup>-1</sup>) 1458, 1363, 1120, 954, 863, 787, 756, 659; HRMS (ESI<sup>+</sup>) Calcd for C<sub>15</sub>H<sub>22</sub>BO<sub>3</sub><sup>+</sup> ([M+H]<sup>+</sup>) 261.1657, Found 261.1650.

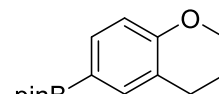**4,4,5,5-tetramethyl-2-(4-(methylthio)phenyl)-1,3,2-dioxaborolane (1x + 2x)**

The mixture of product (75 mg, 60% yield, *para/meta* = 40 : 60); *para*-borylated product **1x** was obtained by further purification of the crude mixture by GPC (30 mg); the data of **1x**: <sup>1</sup>H NMR (400 MHz, CDCl<sub>3</sub>) δ 7.74 (d, *J* = 8.2 Hz, 2H), 7.28 (d,

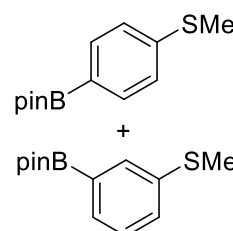

$J = 8.2$  Hz, 2H), 2.53 (s, 3H), 1.38 (s, 12H);  $^{13}\text{C}$  NMR (100 MHz,  $\text{CDCl}_3$ )  $\delta$  142.8, 135.3, 125.2, 83.9, 25.1, 15.2; the data of **2x**:  $^1\text{H}$  NMR (400 MHz,  $\text{CDCl}_3$ )  $\delta$  7.68 (s, 1H), 7.54 (d,  $J = 7.3$  Hz, 1H), 7.31 (d,  $J = 6.9$  Hz, 1H), 7.24-7.28 (m, 1H), 2.46 (s, 3H), 1.31 (s, 12H);  $^{13}\text{C}$  NMR (100 MHz,  $\text{CDCl}_3$ )  $\delta$  138.0, 132.9, 131.6, 129.7, 128.4, 84.1, 25.0, 16.0; IR (KBr,  $\nu / \text{cm}^{-1}$ ) 2974, 1583, 1348, 1048, 863, 791; HRMS (ESI $^+$ ) Calcd for  $\text{C}_{13}\text{H}_{19}\text{BO}_2\text{SNa}$  ( $[\text{M}+\text{Na}]^+$ ) 273.1091, Found 273.1104.

## 4. $^1\text{H}$ -NMR and $^{13}\text{C}$ -NMR Chart

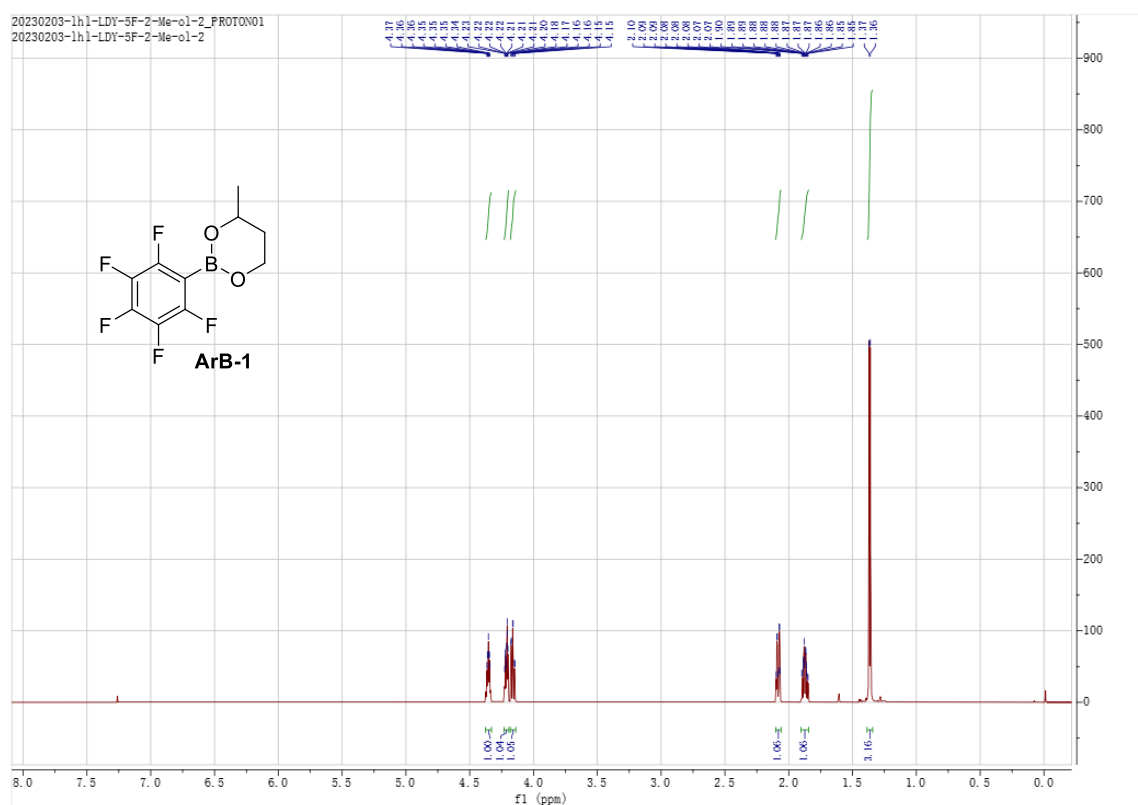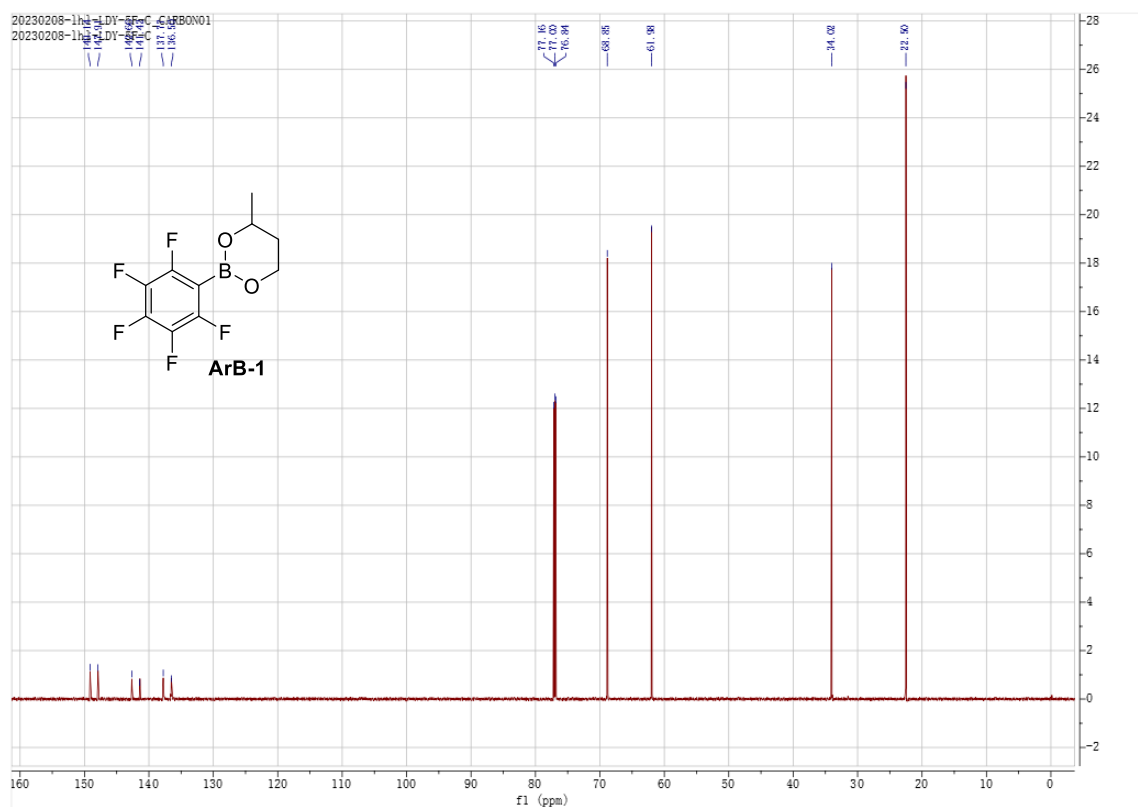

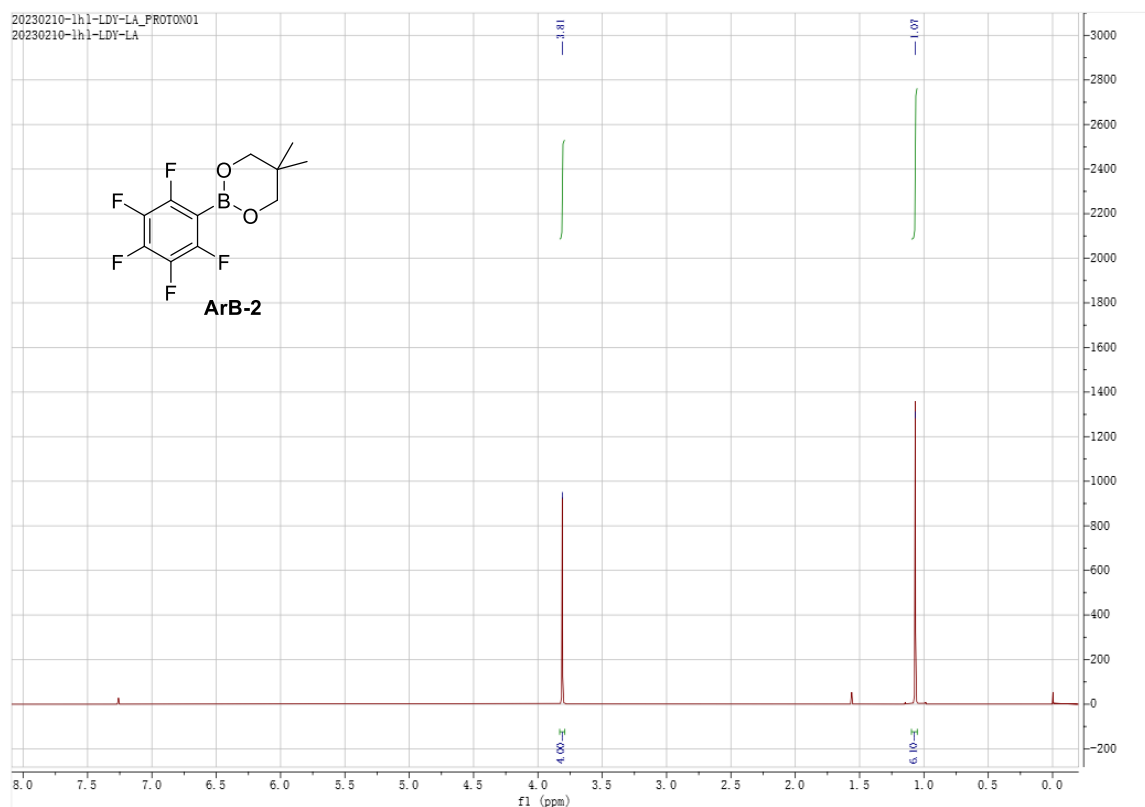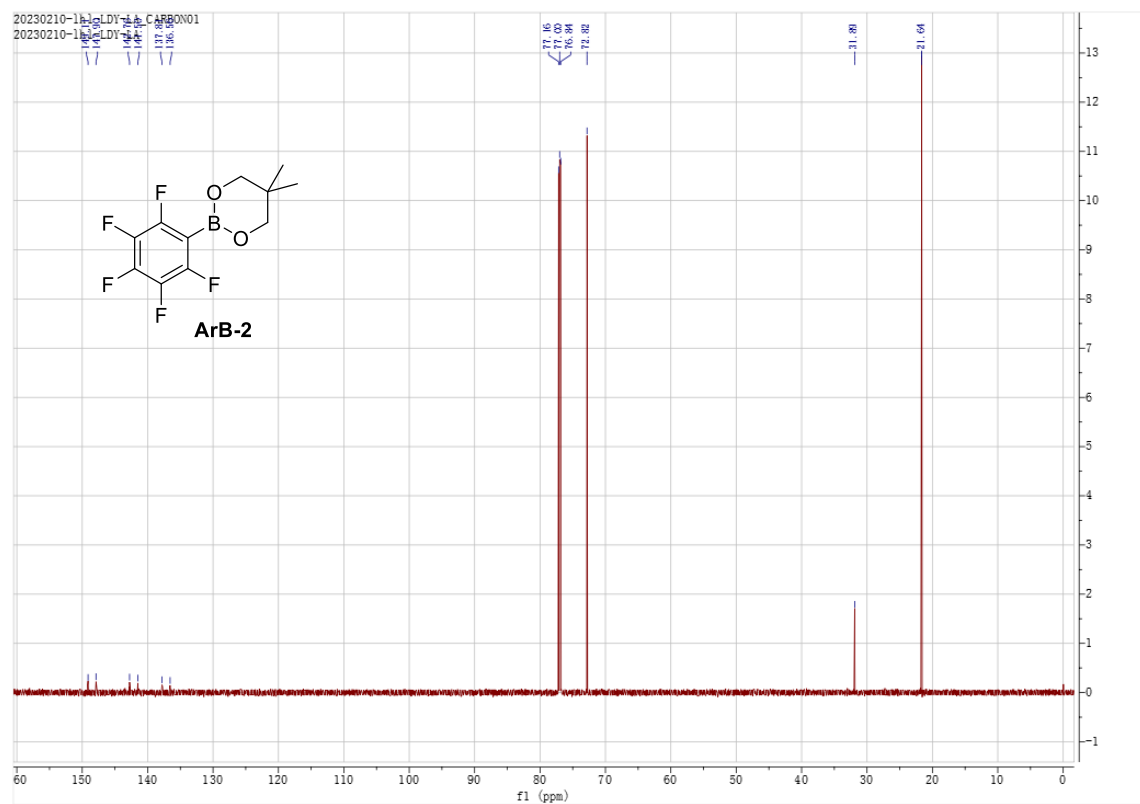

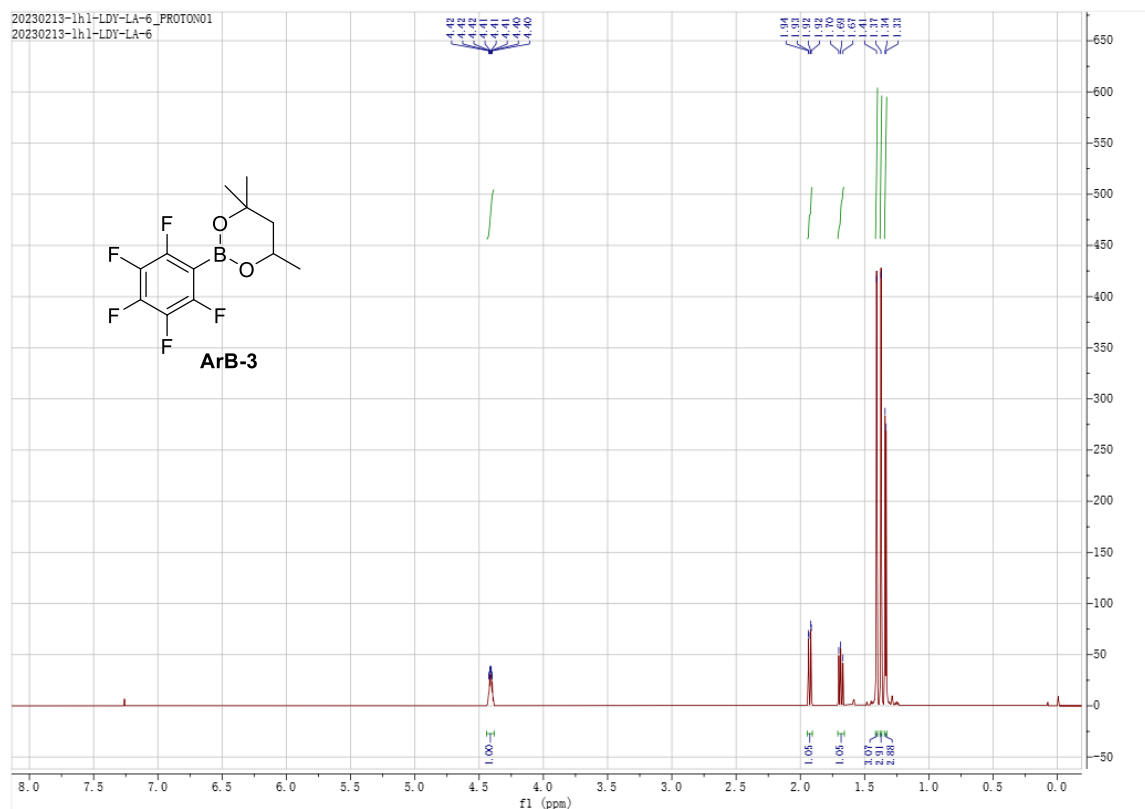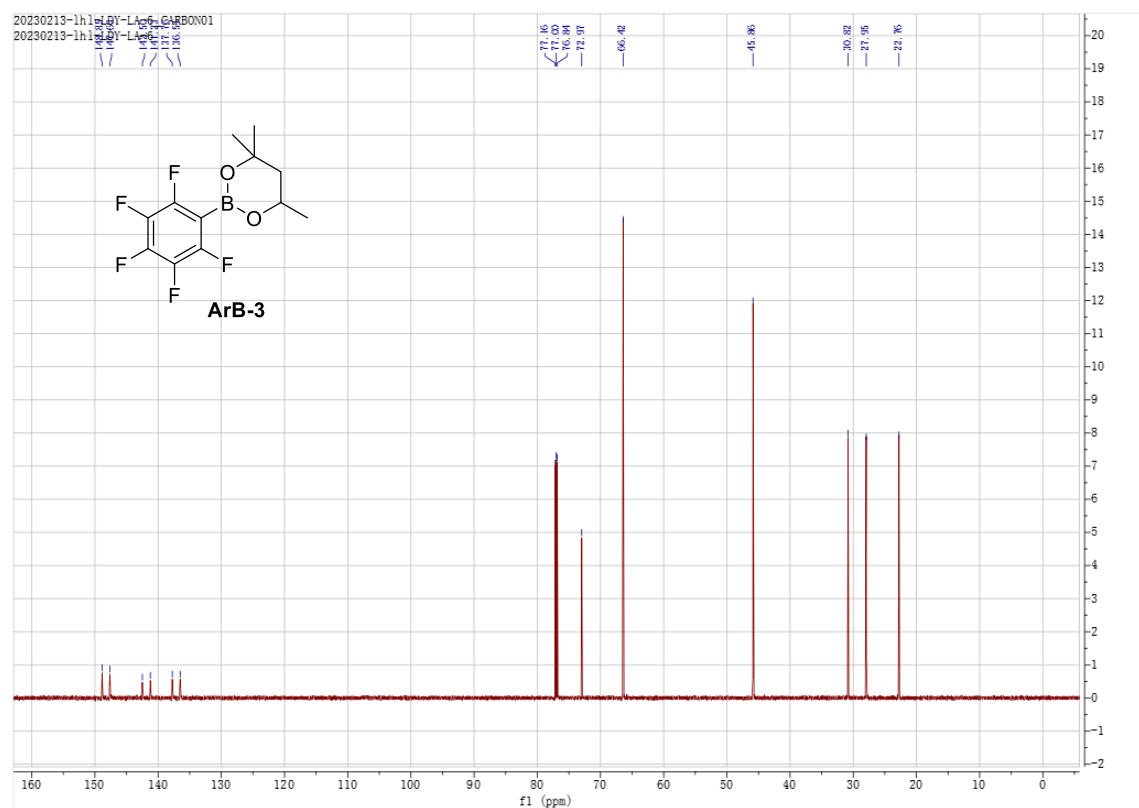

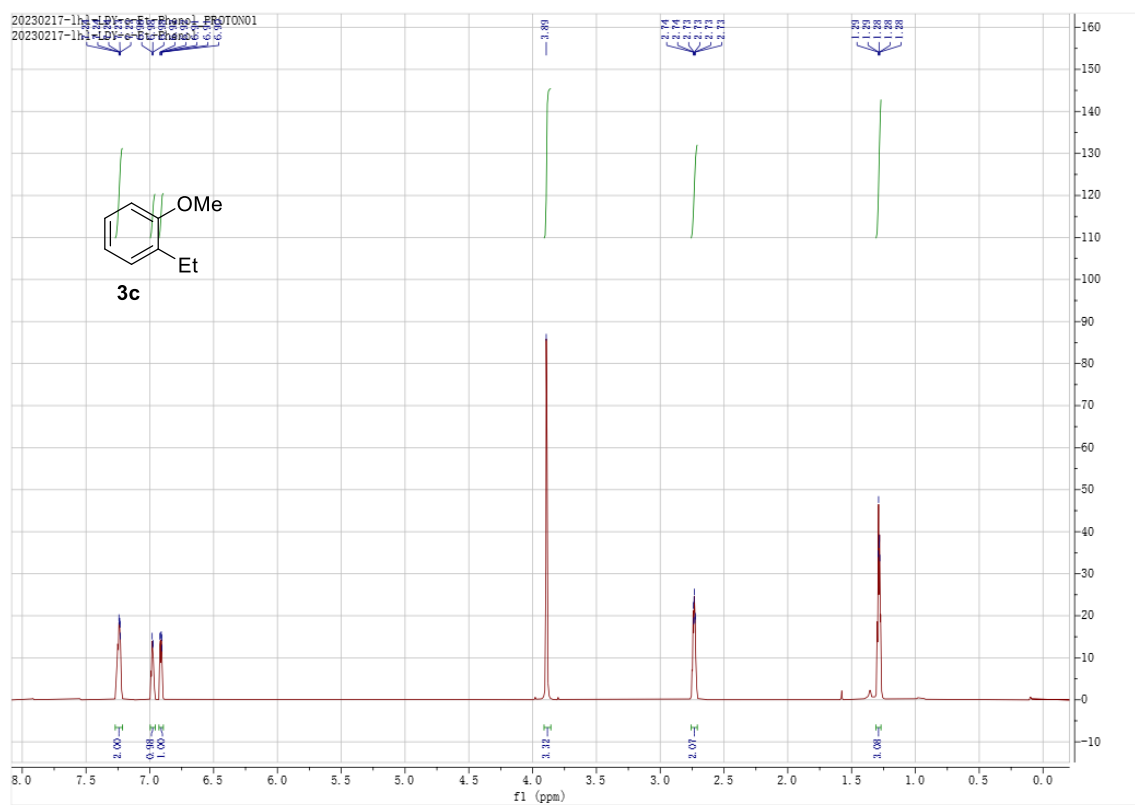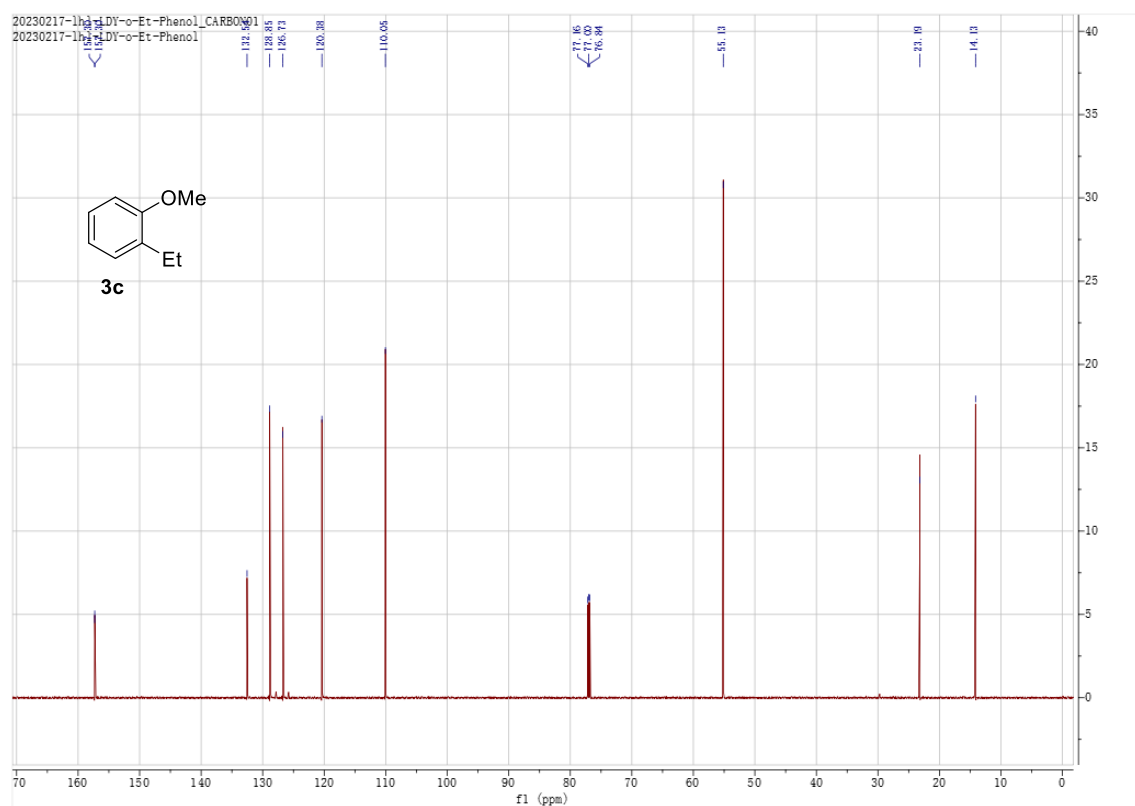

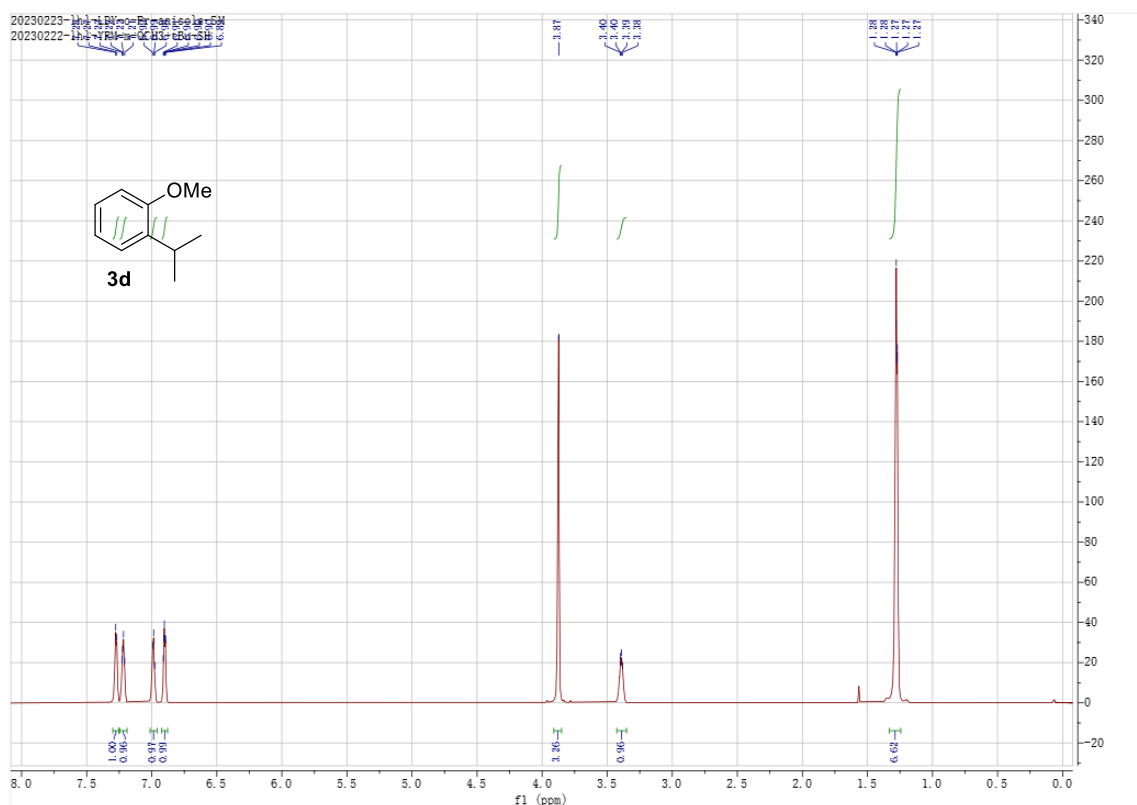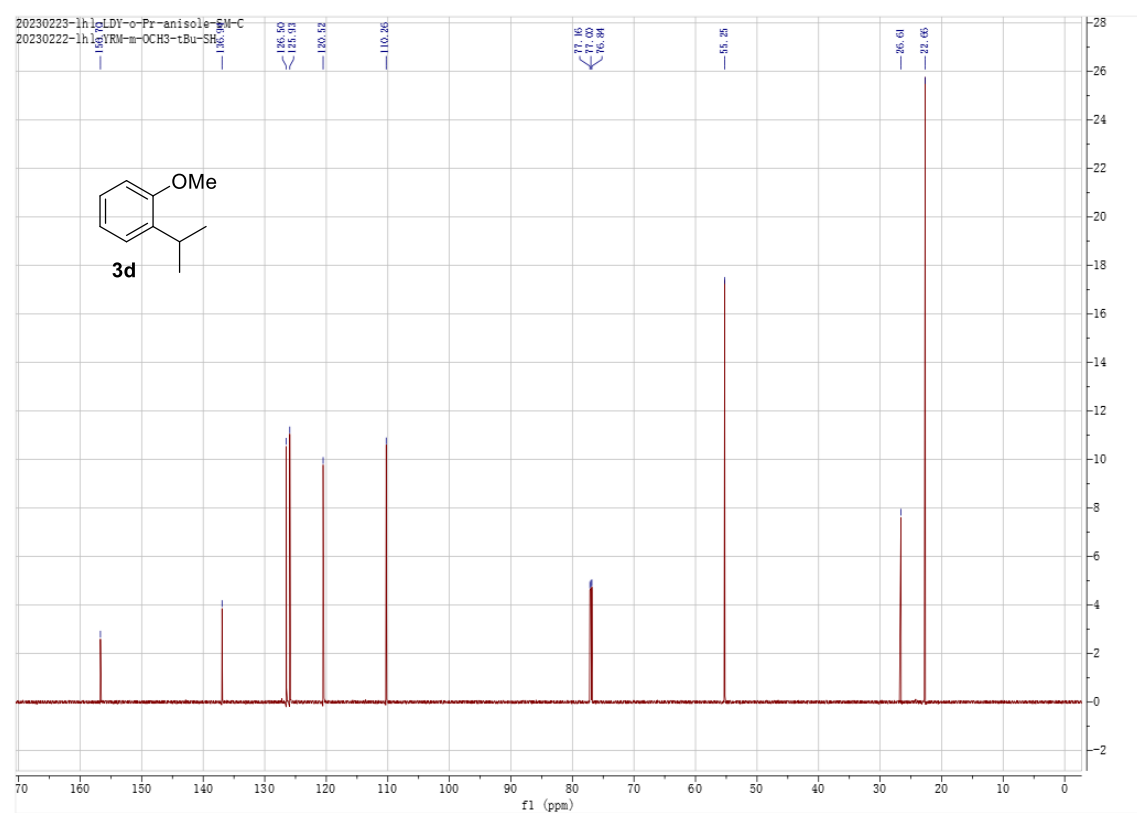

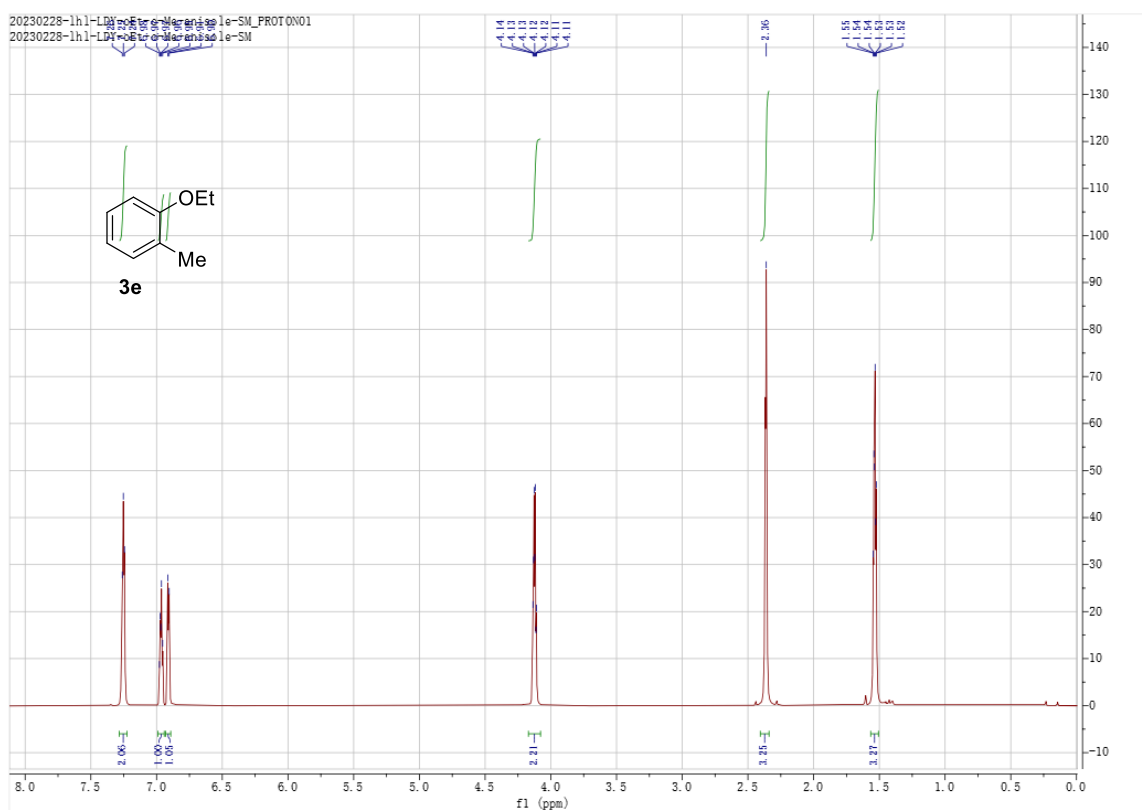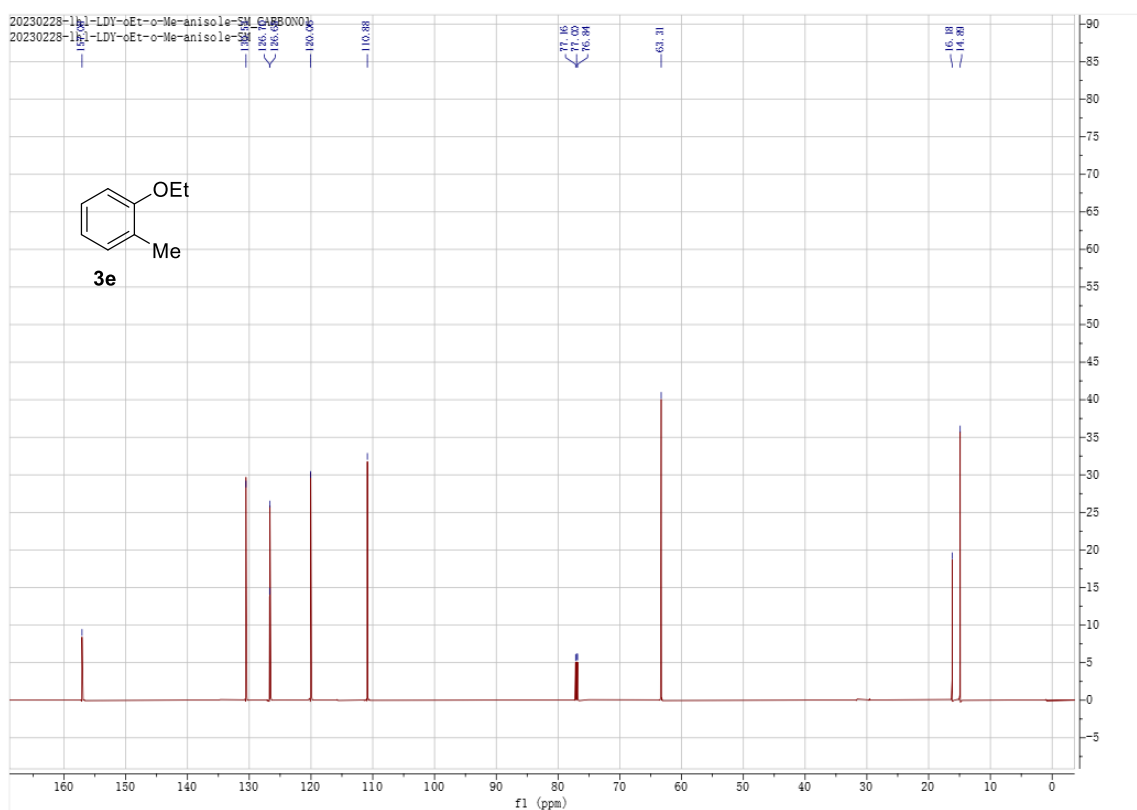

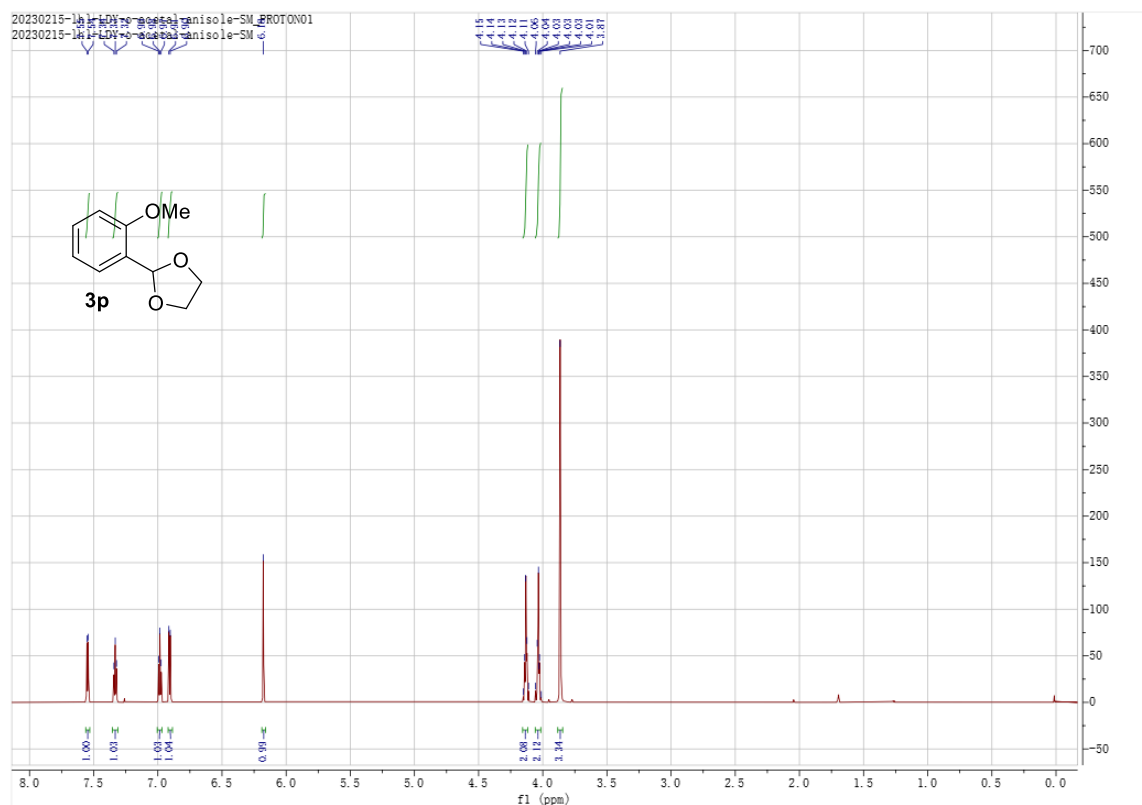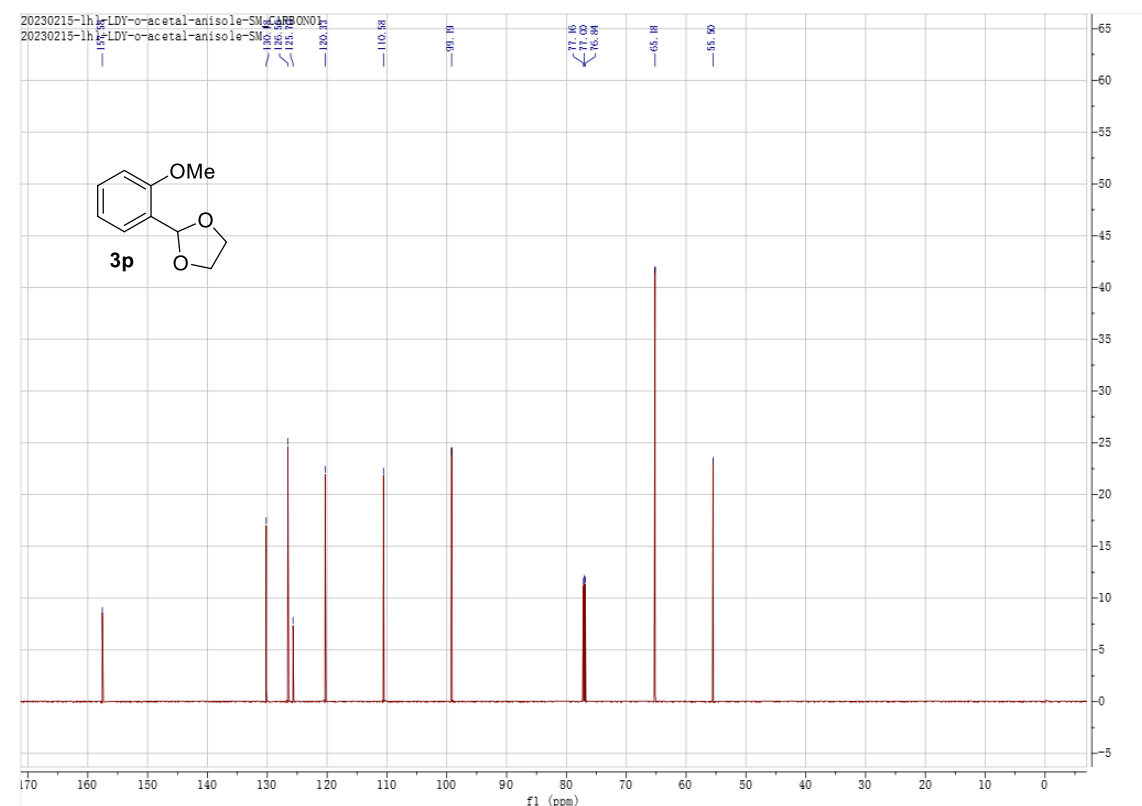

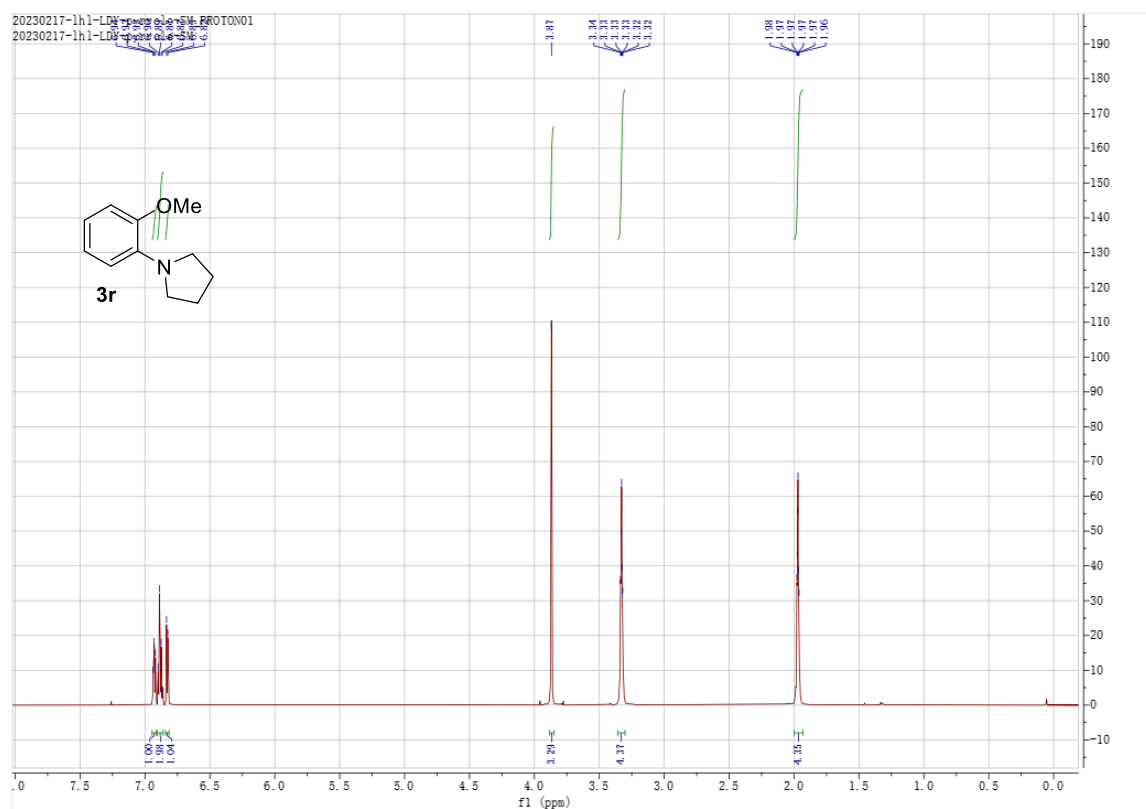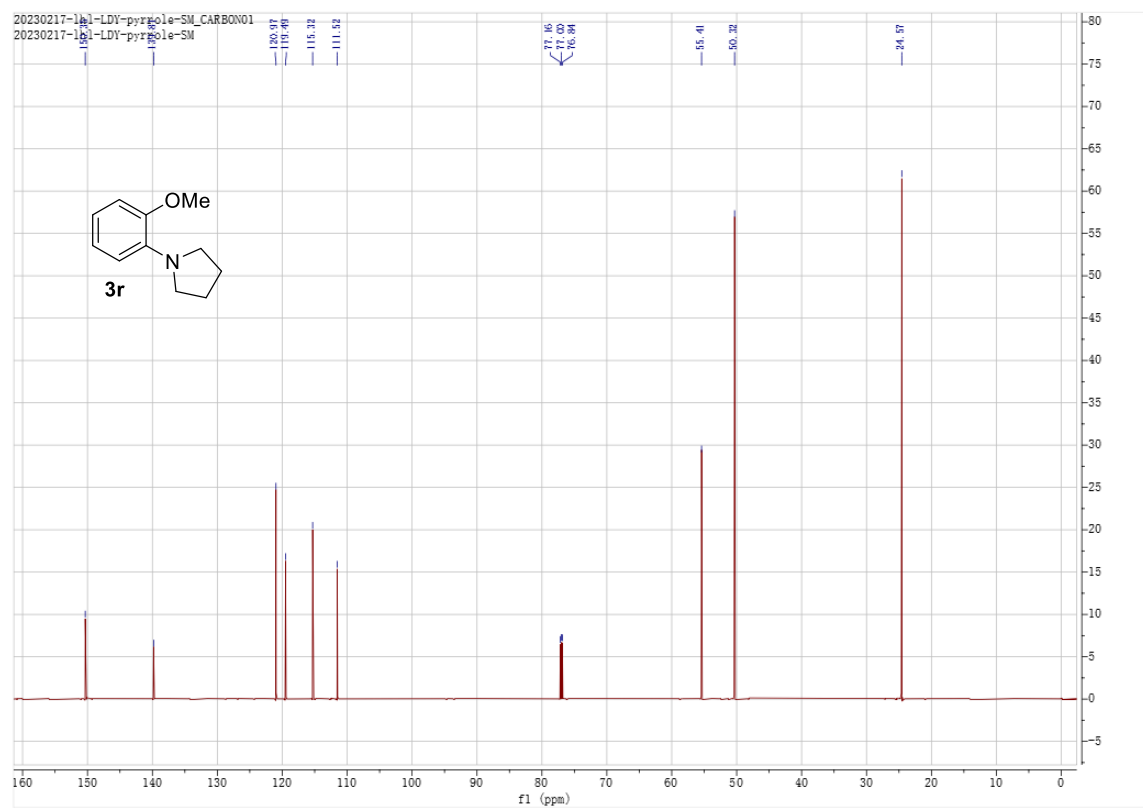

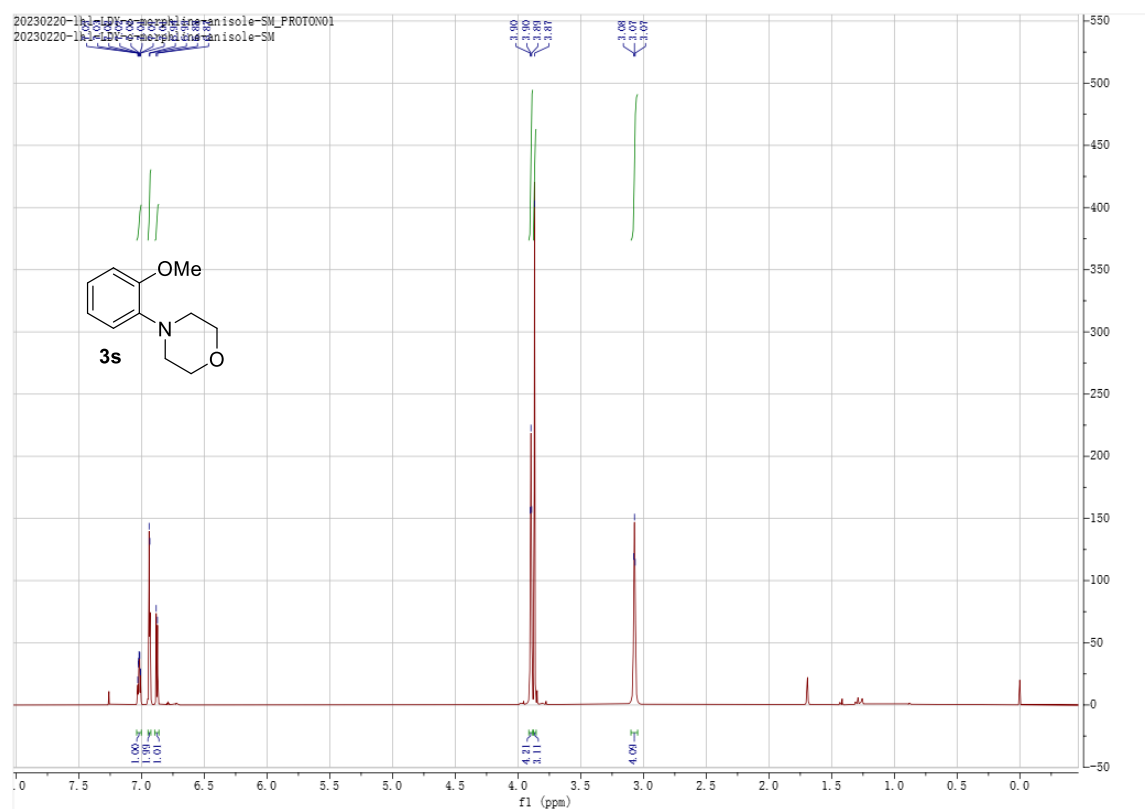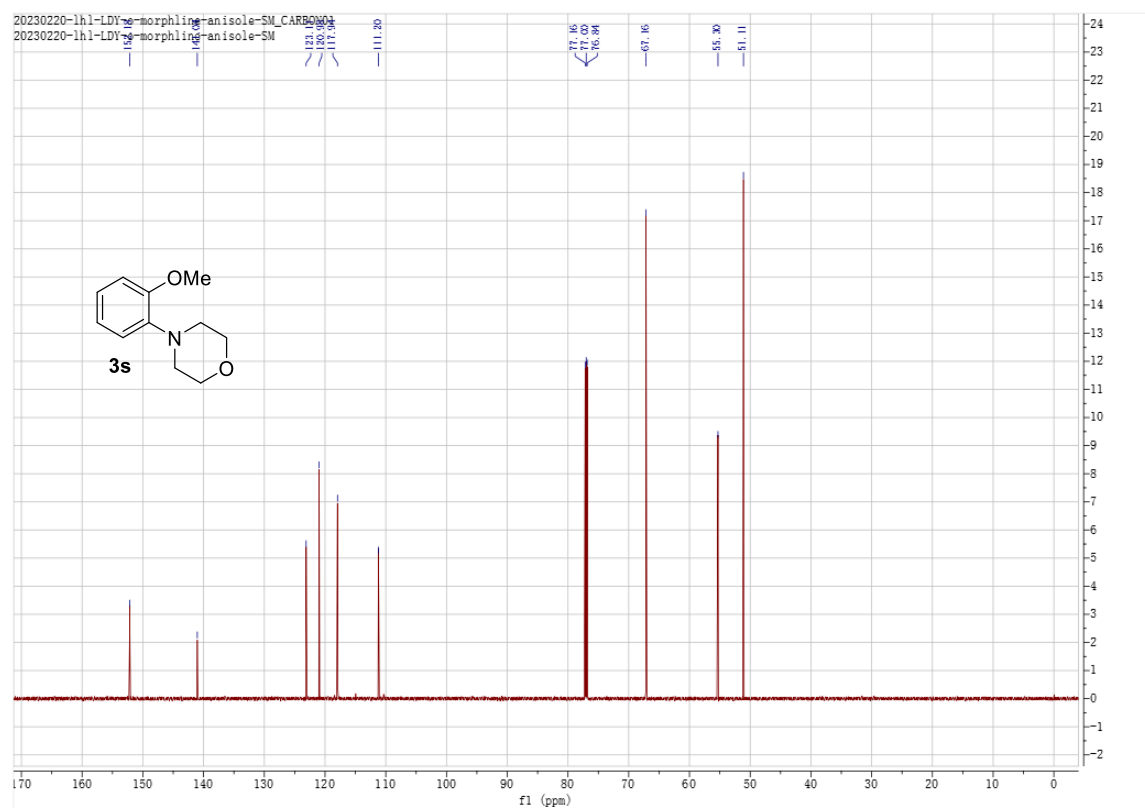

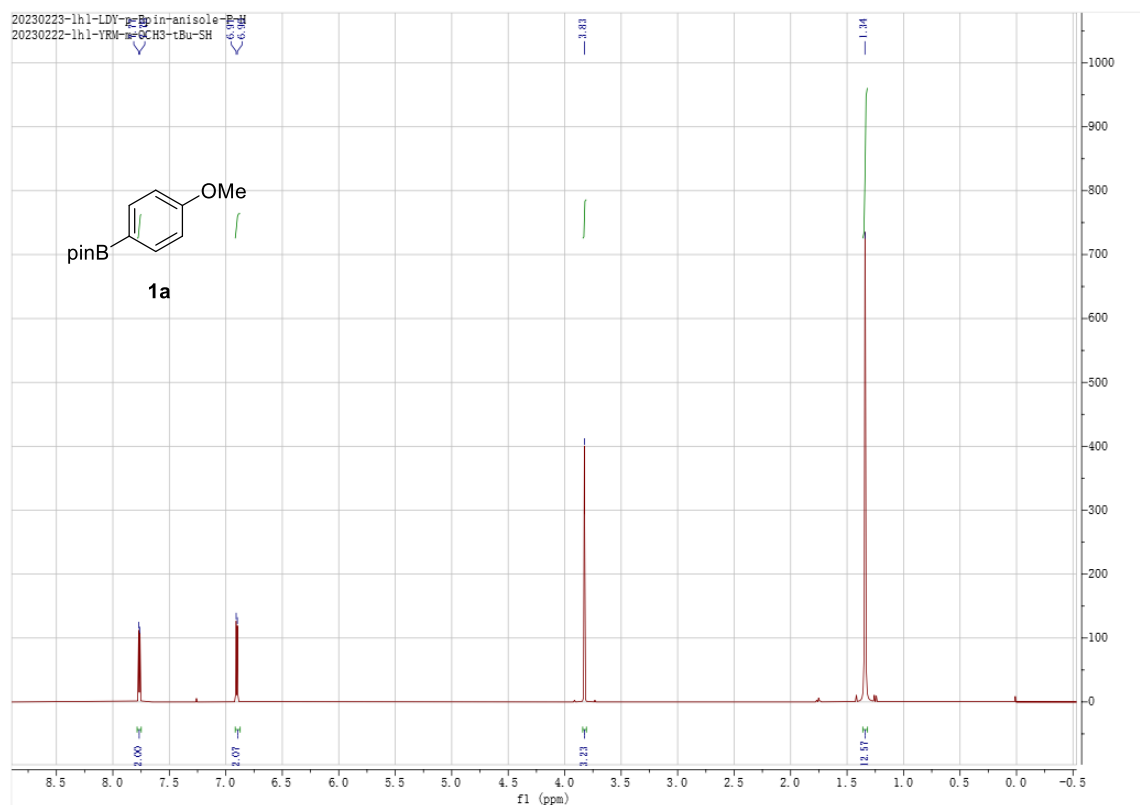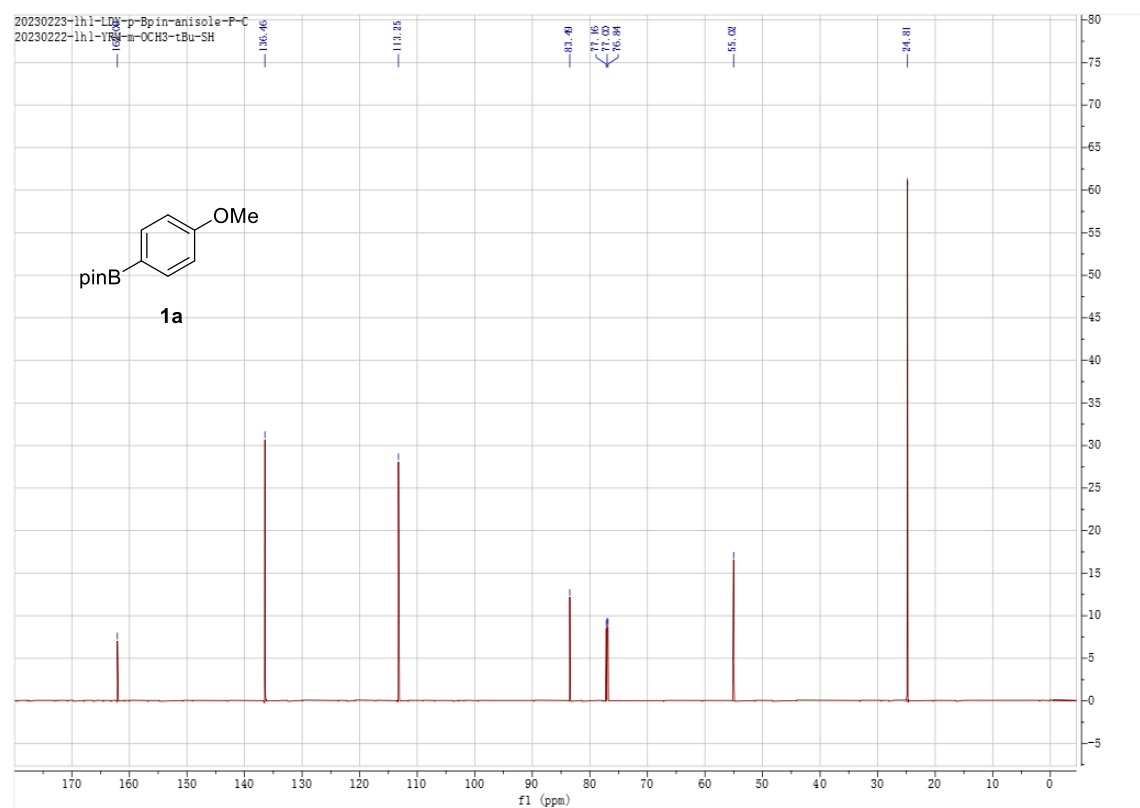

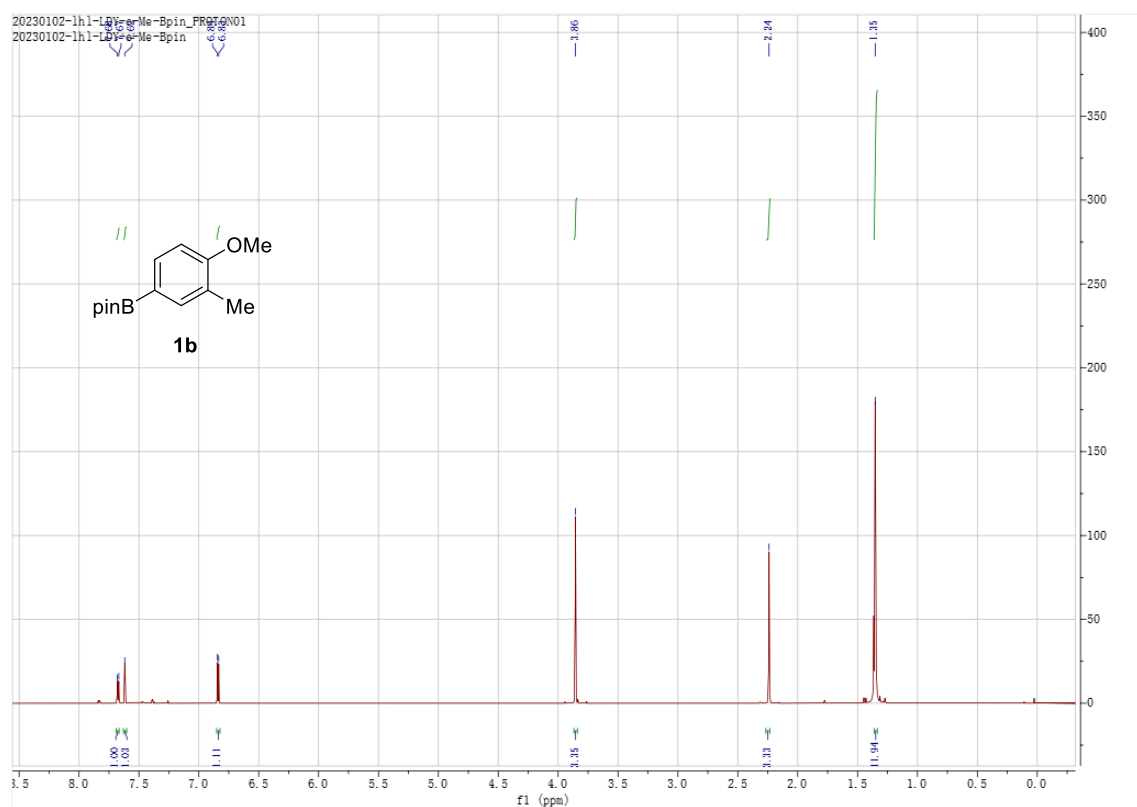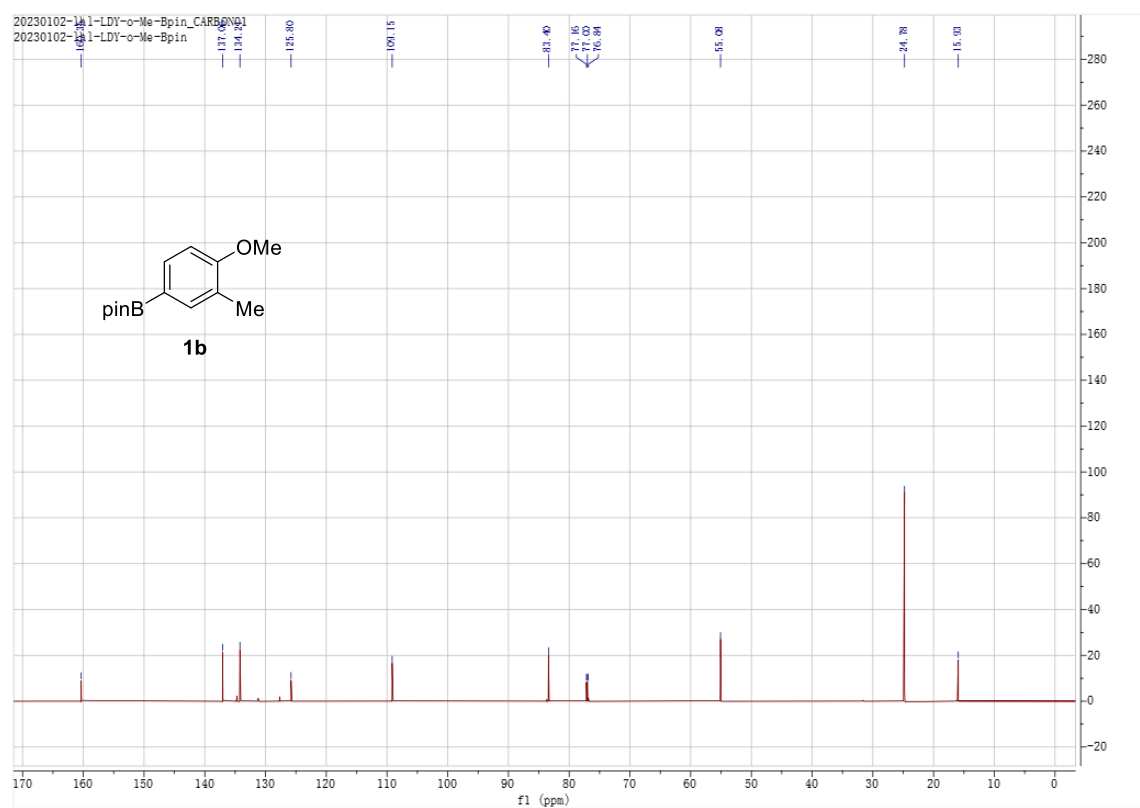

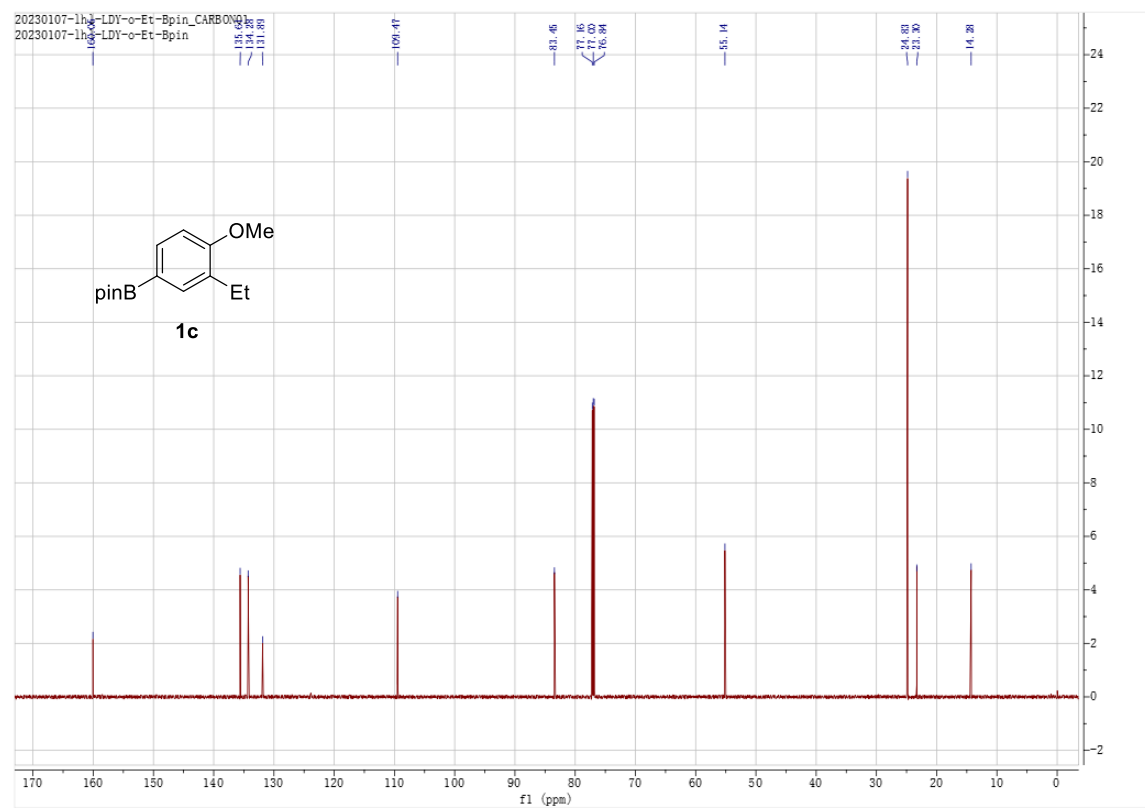

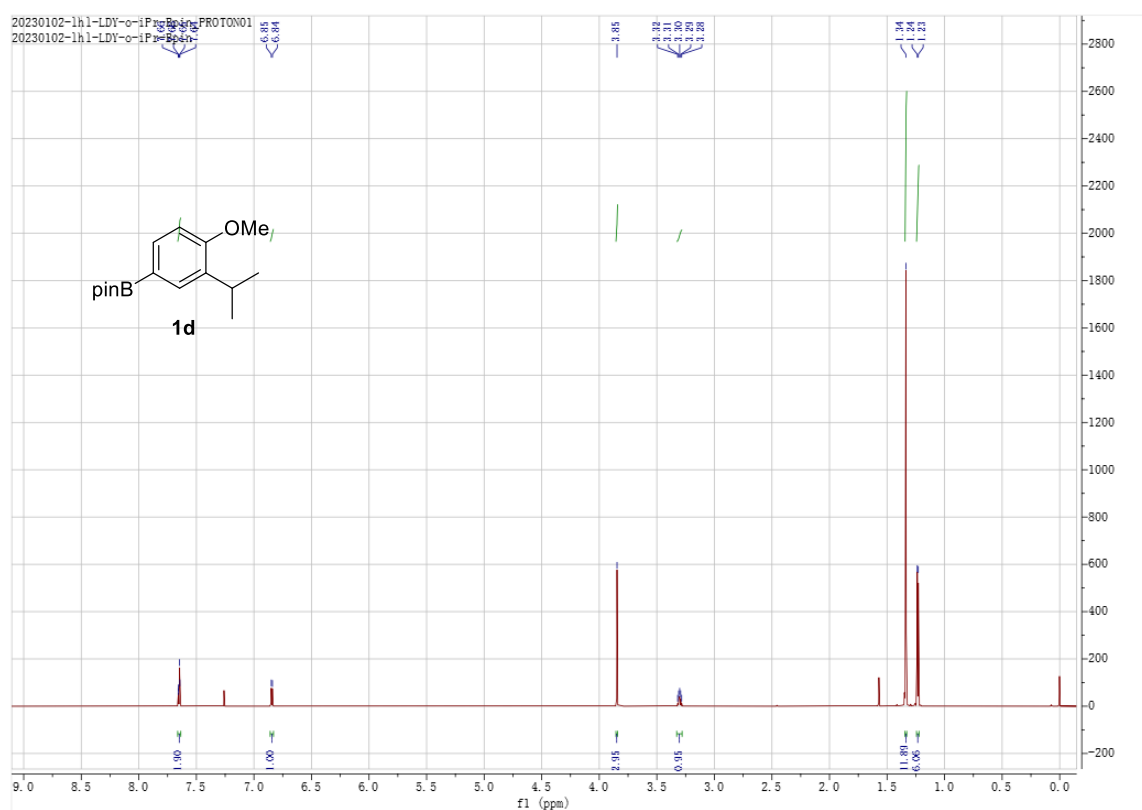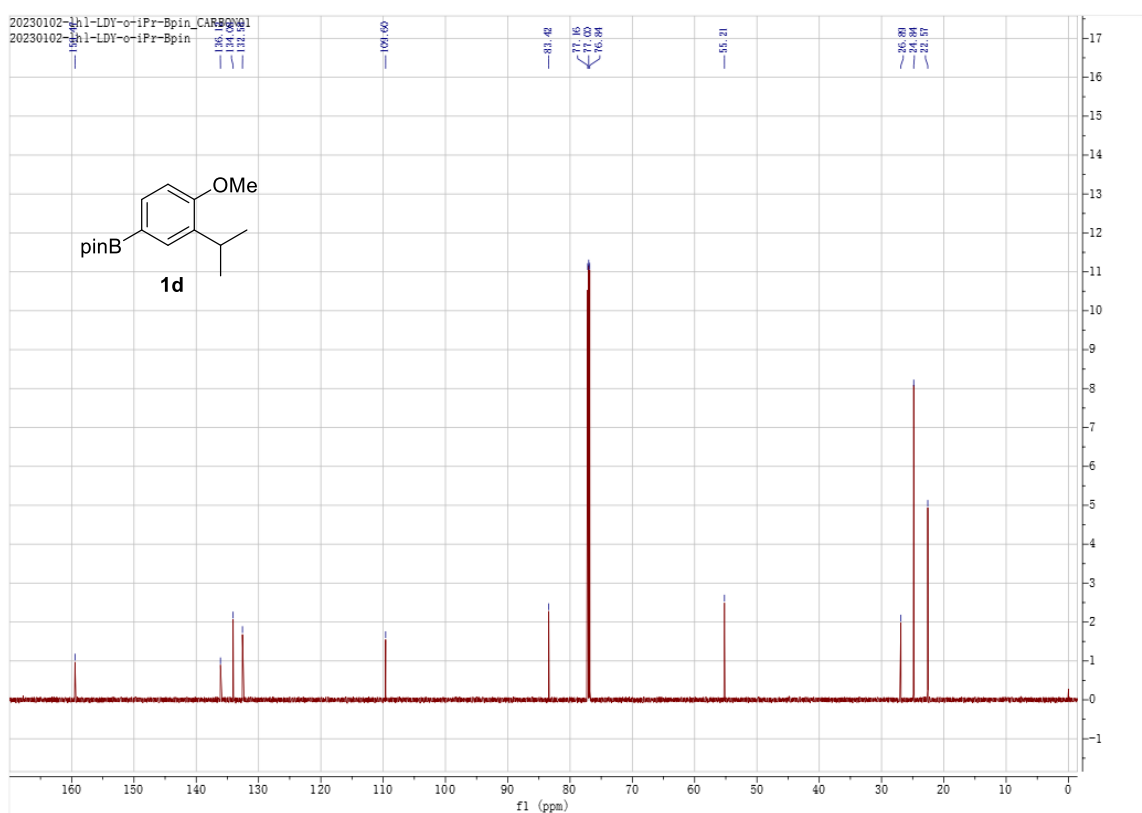

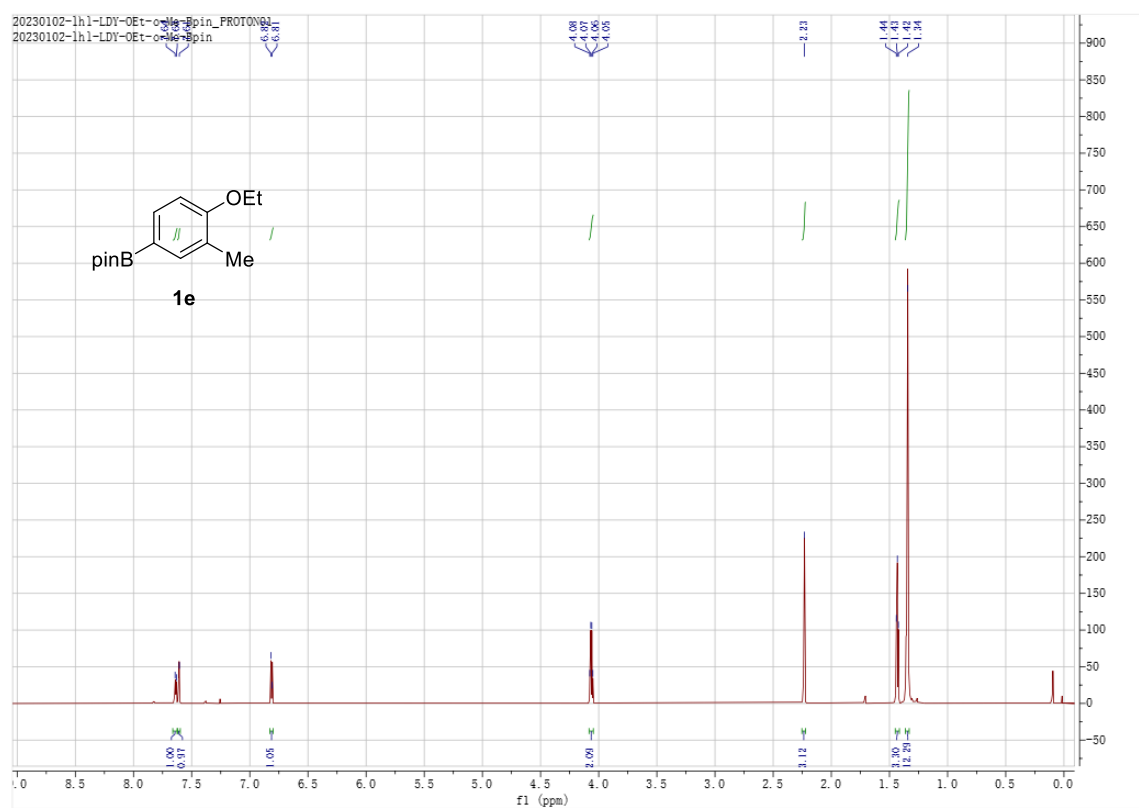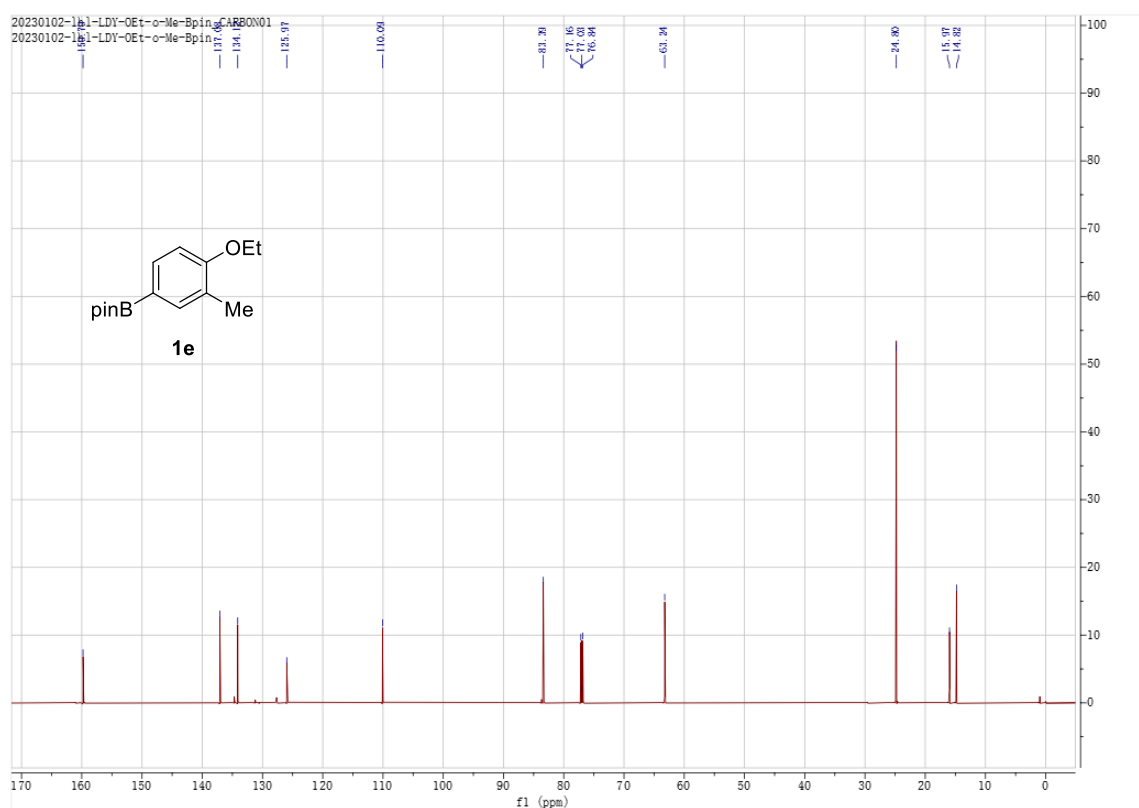

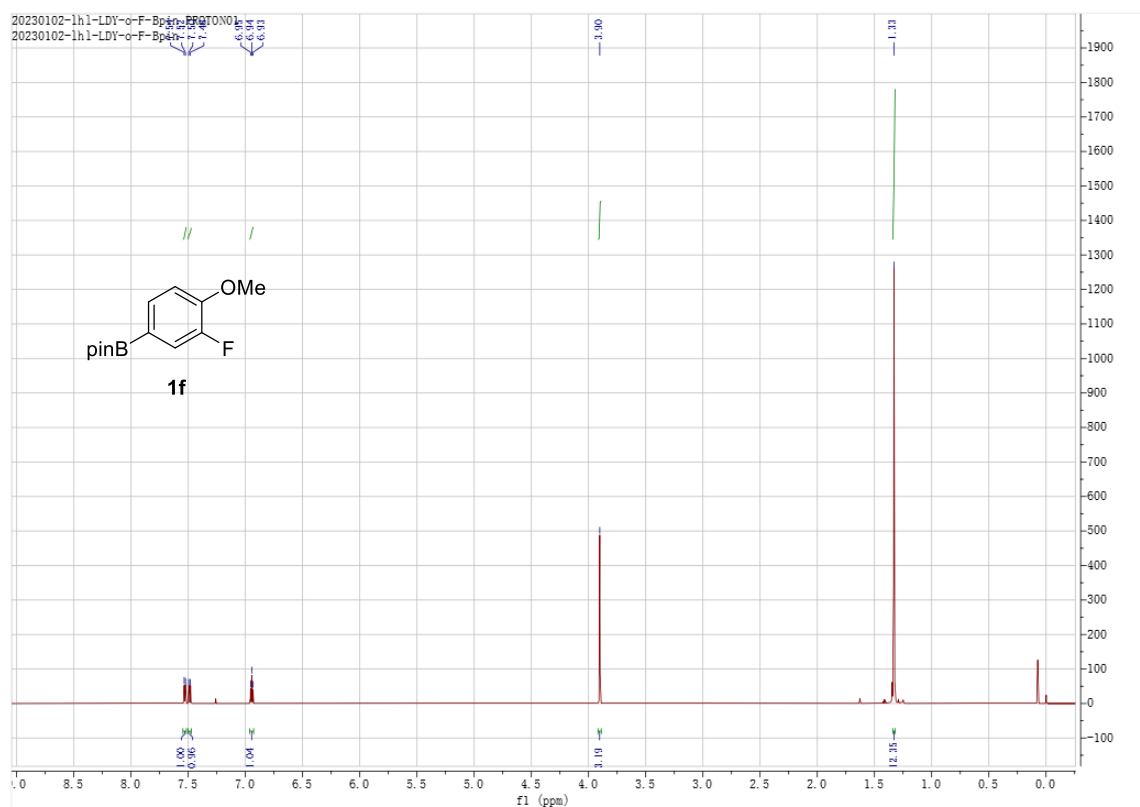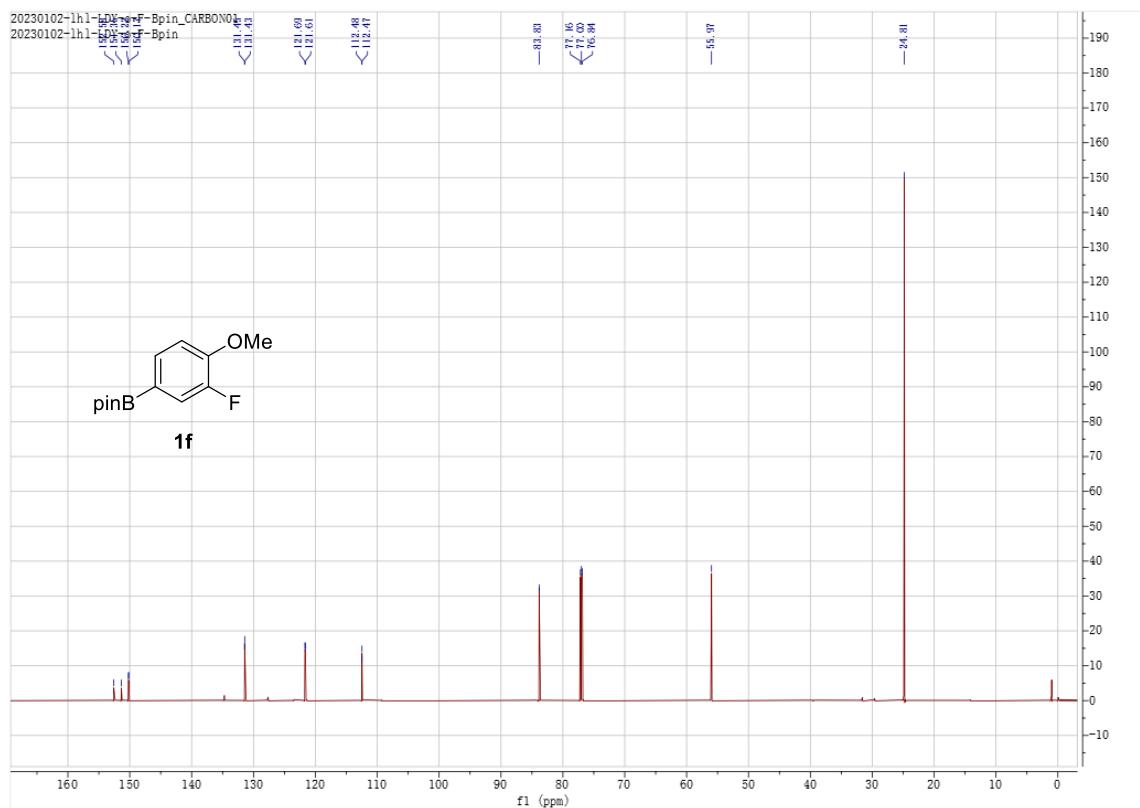



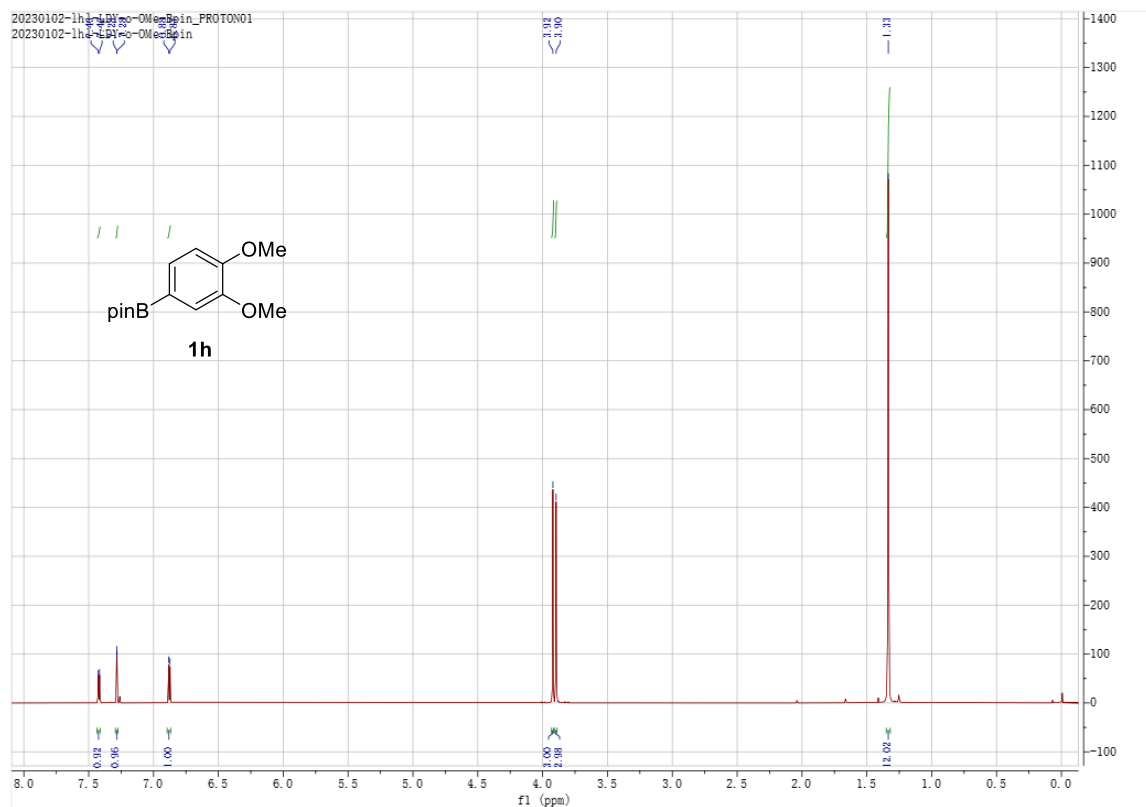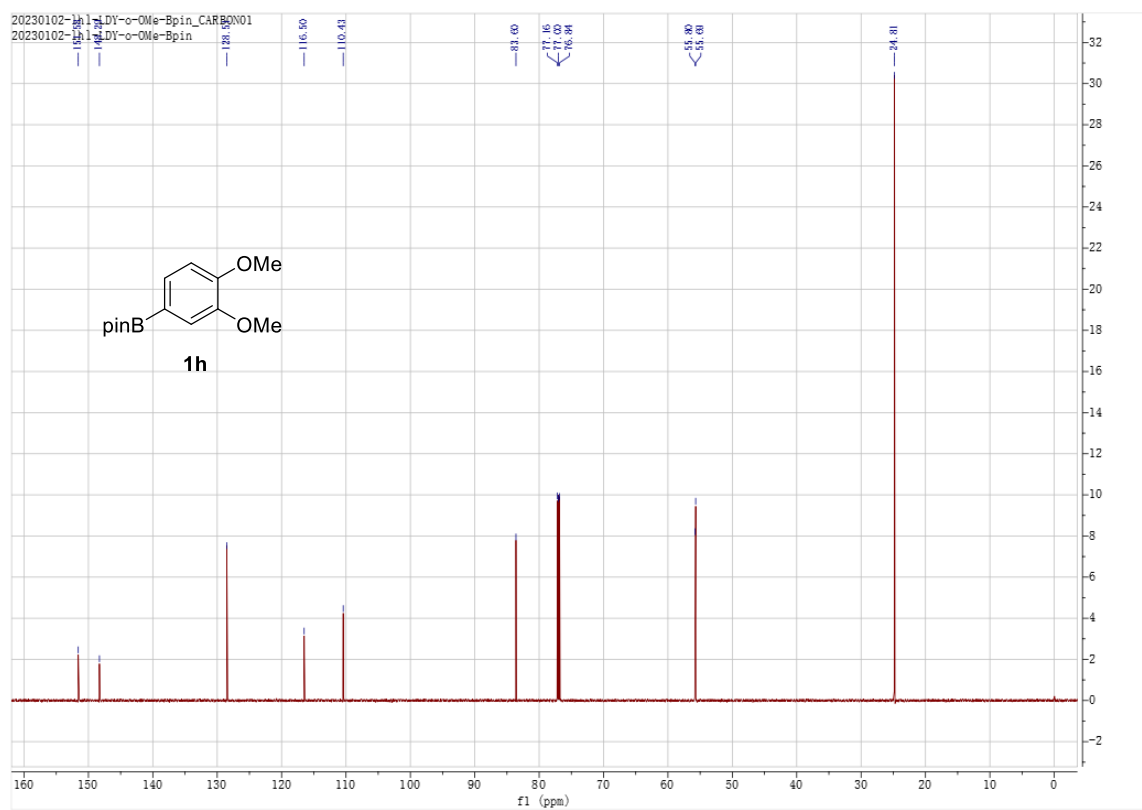

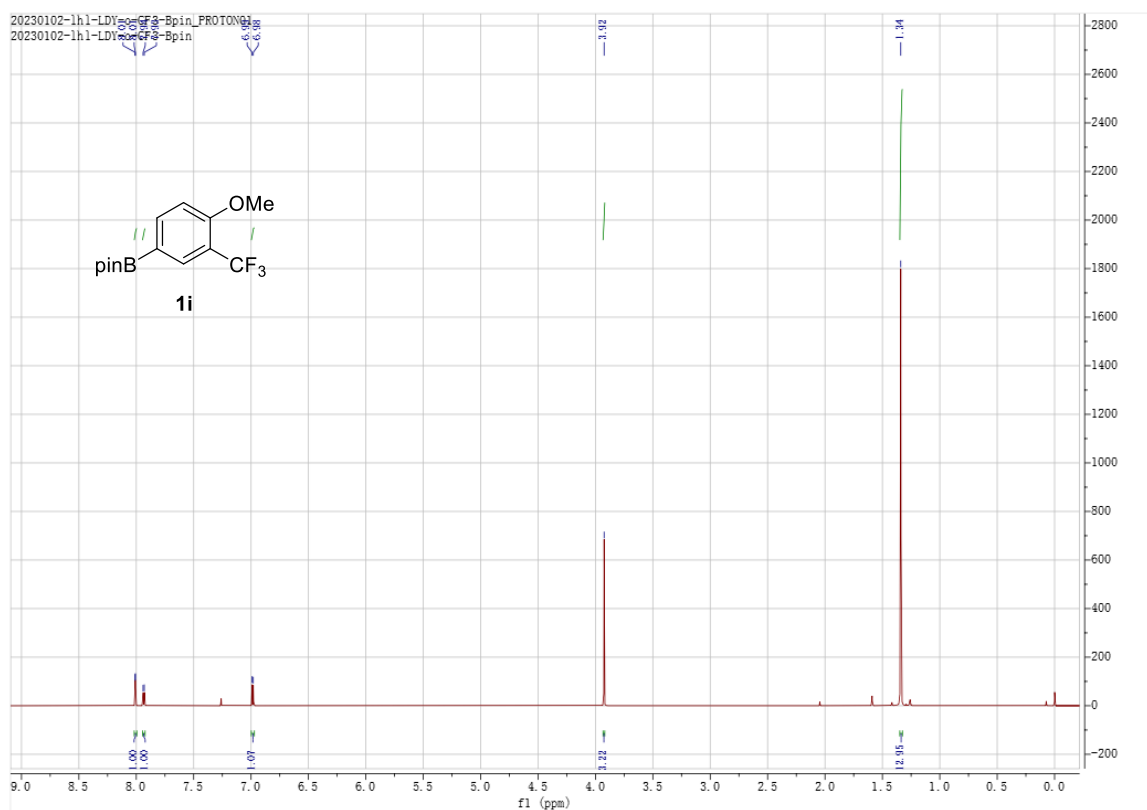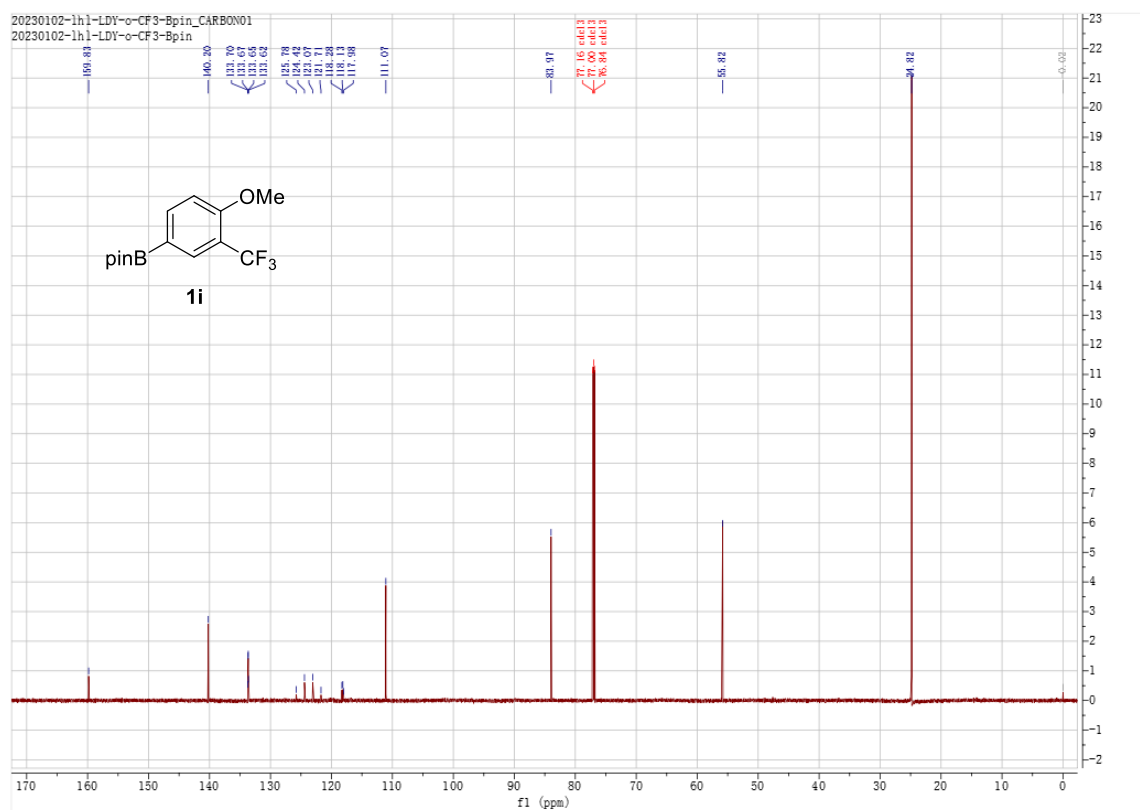

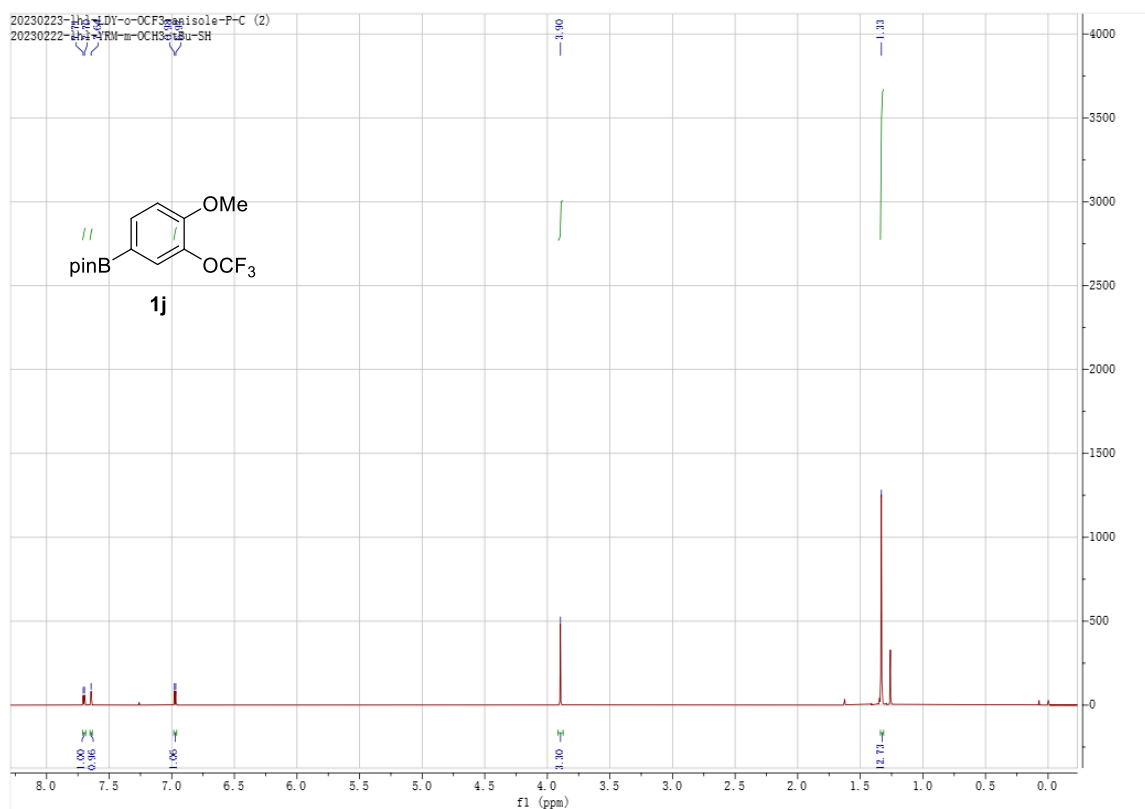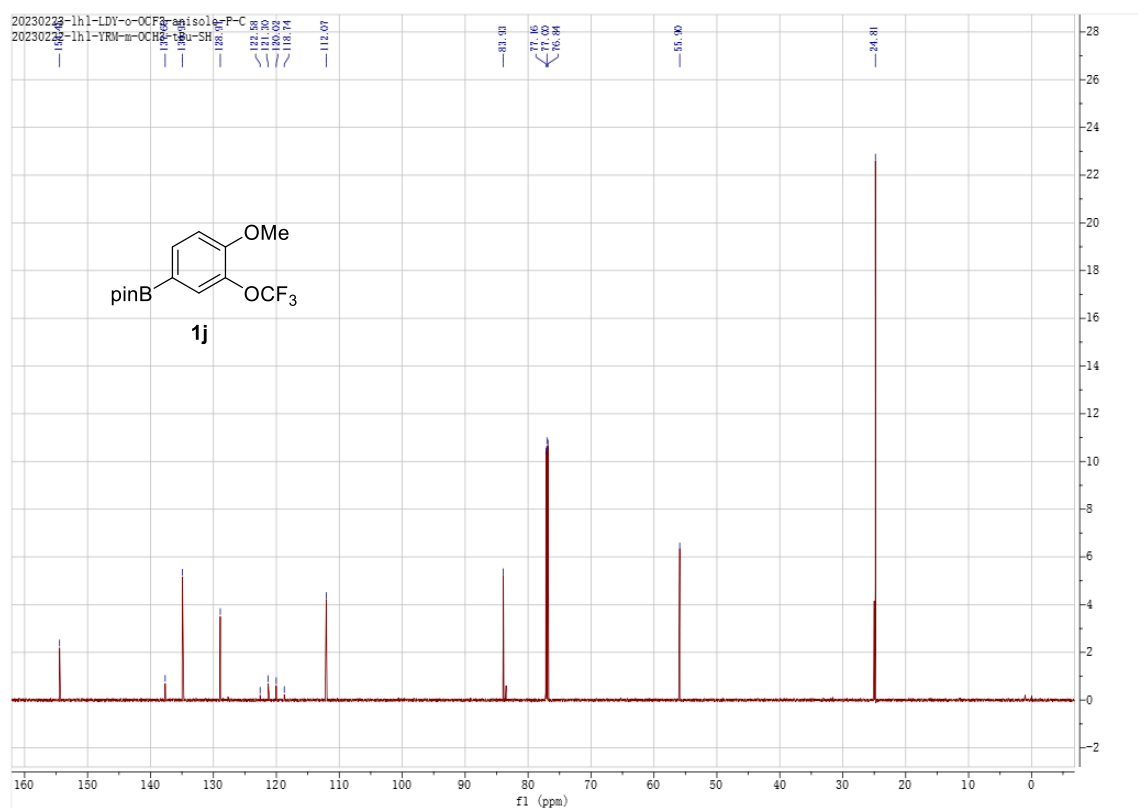

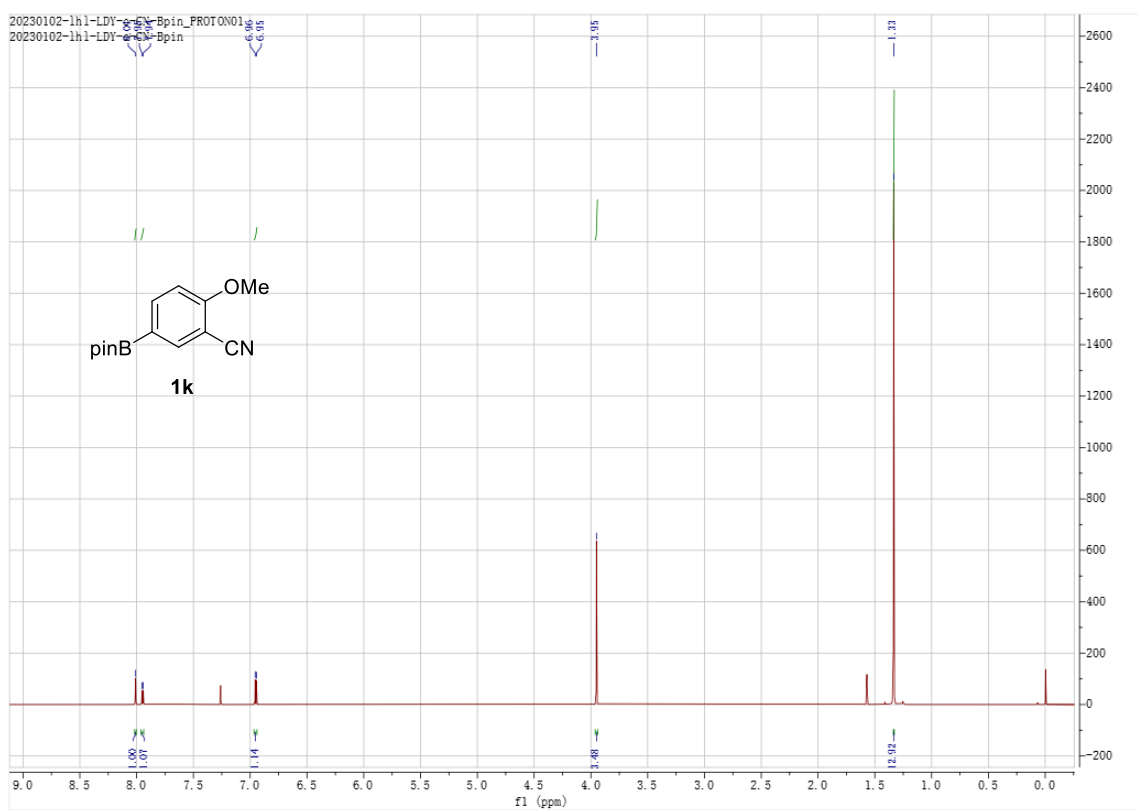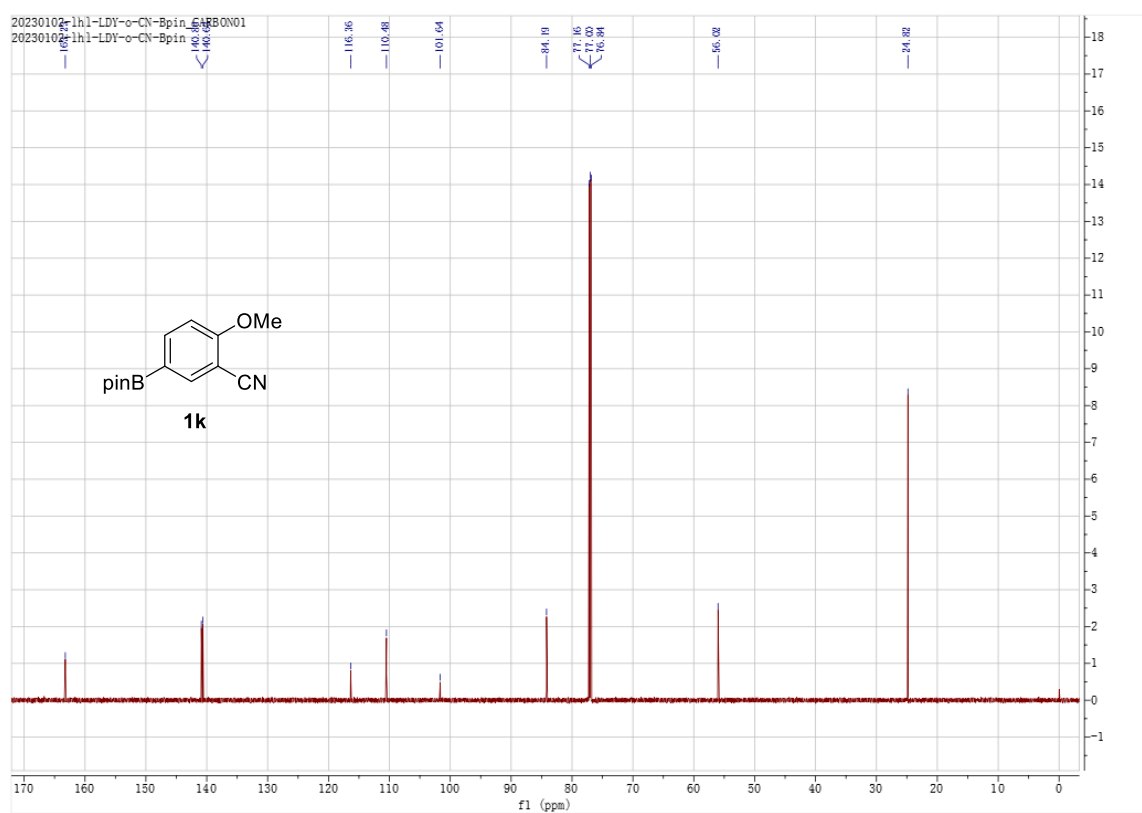

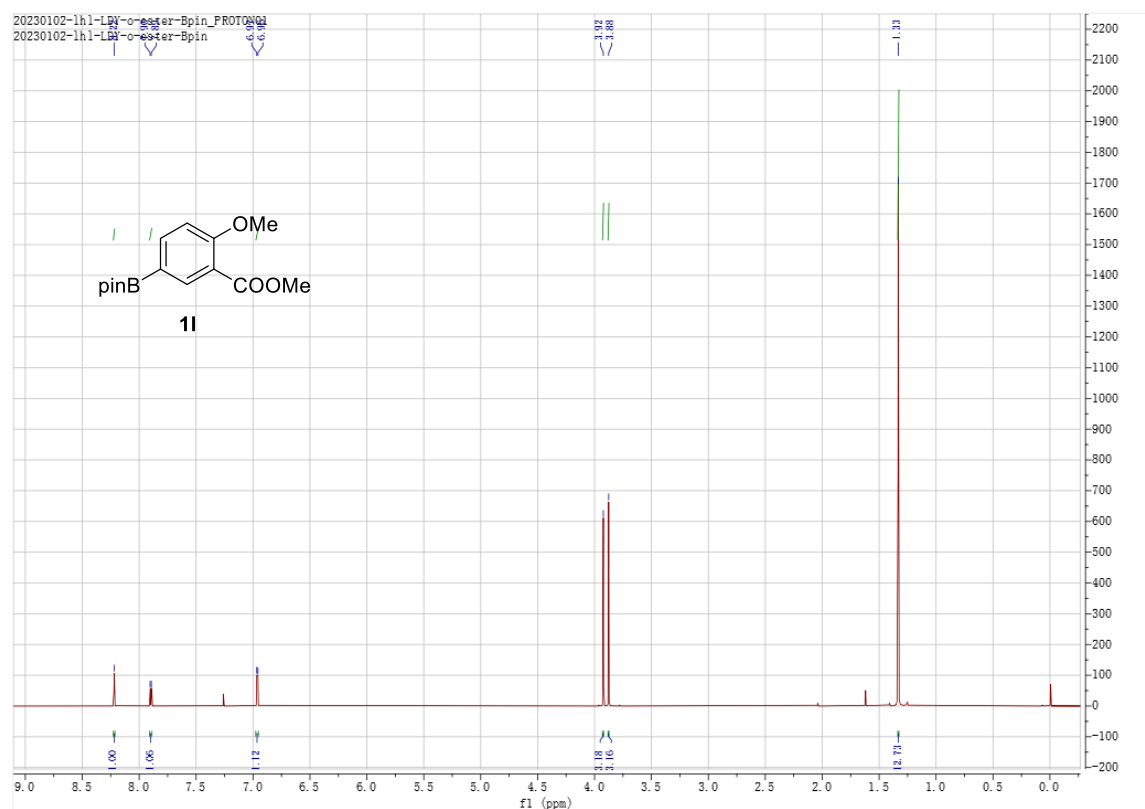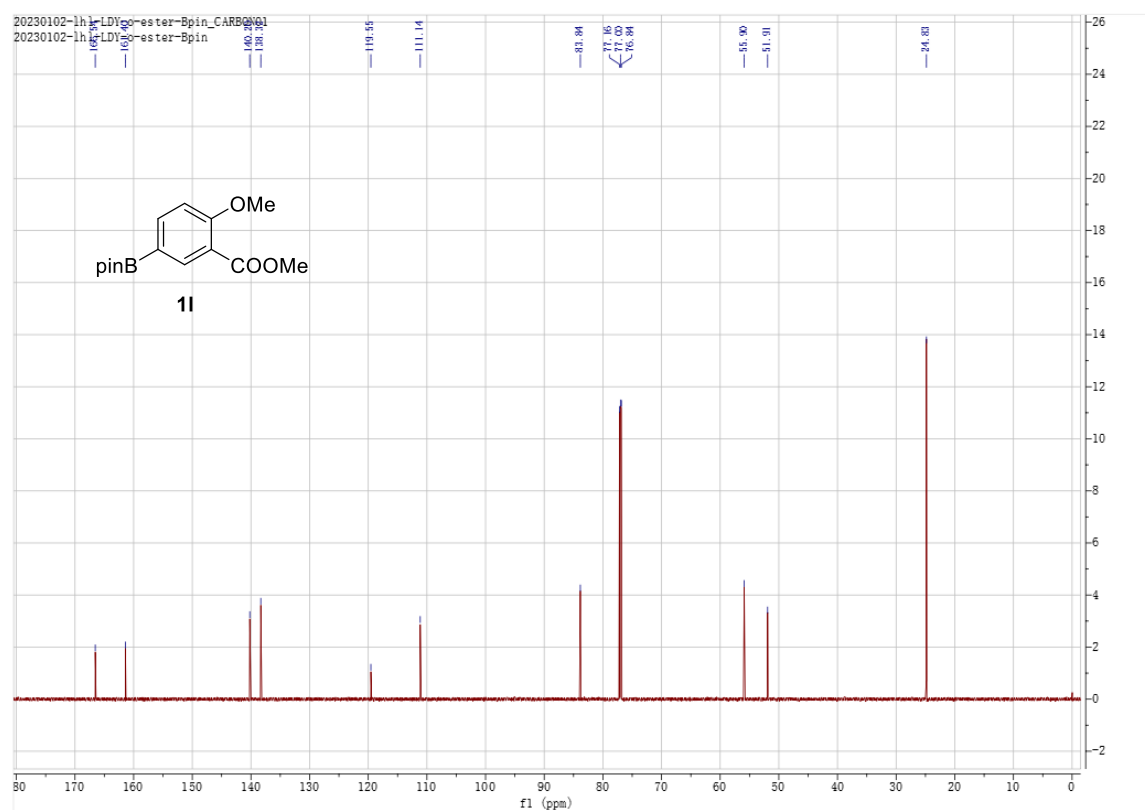

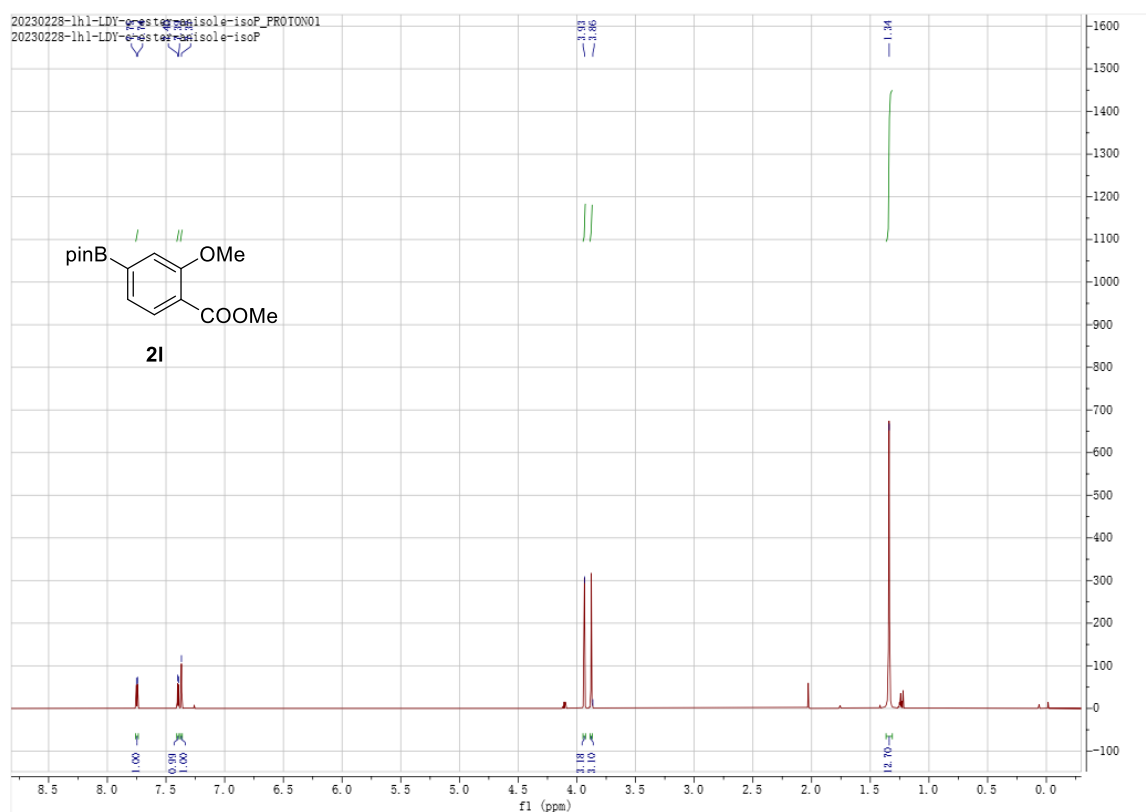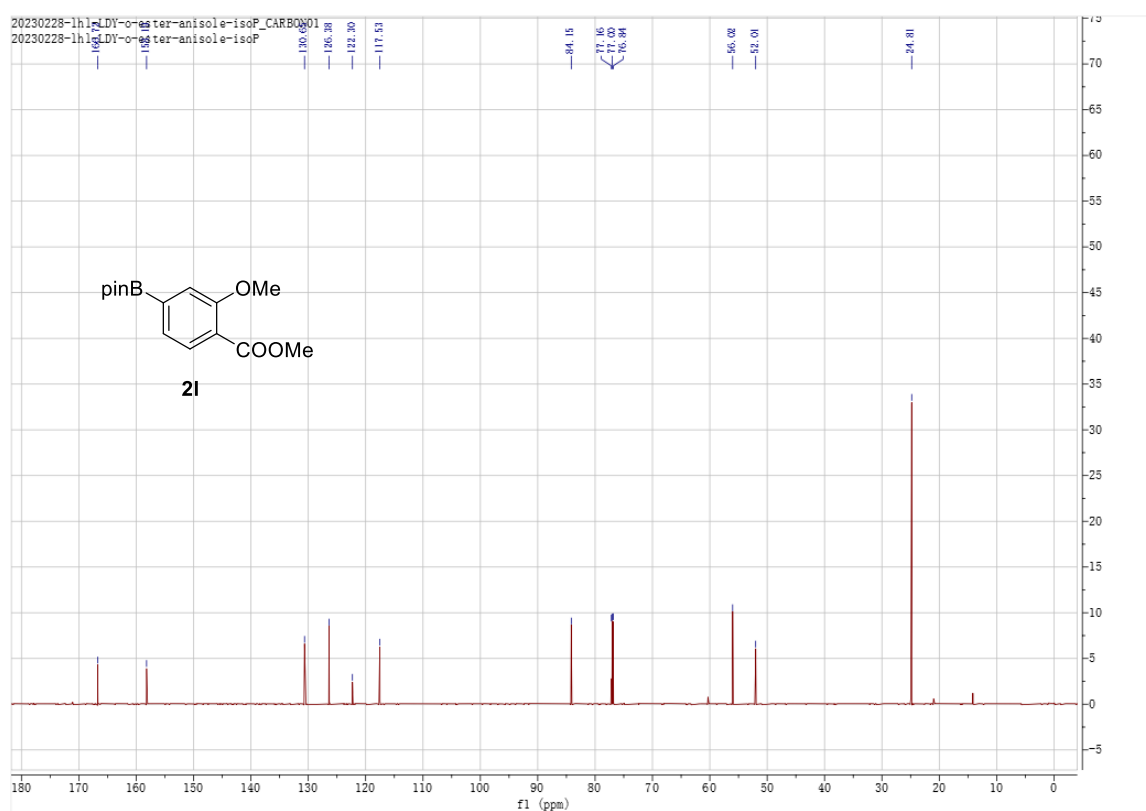

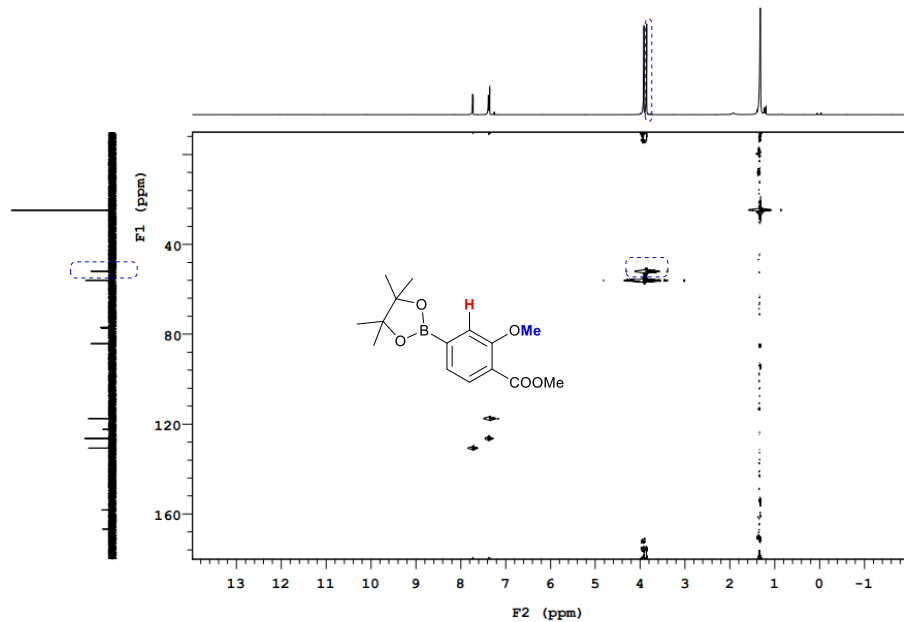

Data file: /home/gasbio/vnmrsys/data/LHL/20230607-1H-LDY1-ester-isopr-HSQC.fid

Plot date: 2023-06-07

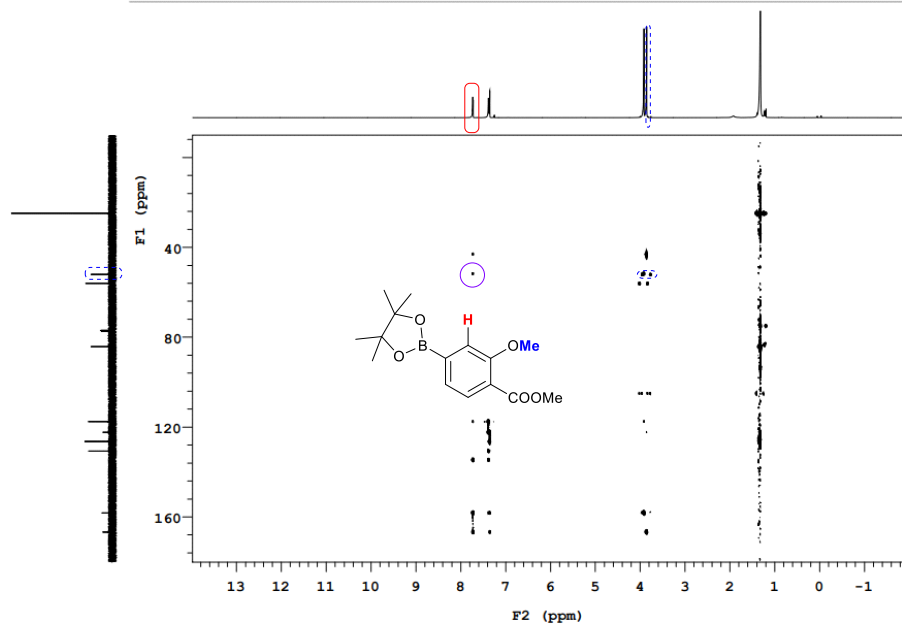

Data file: /home/gasbio/vnmrsys/data/LHL/20230607-1H-LDY1-ester-isopr-HMBC.fid

Plot date: 2023-06-07

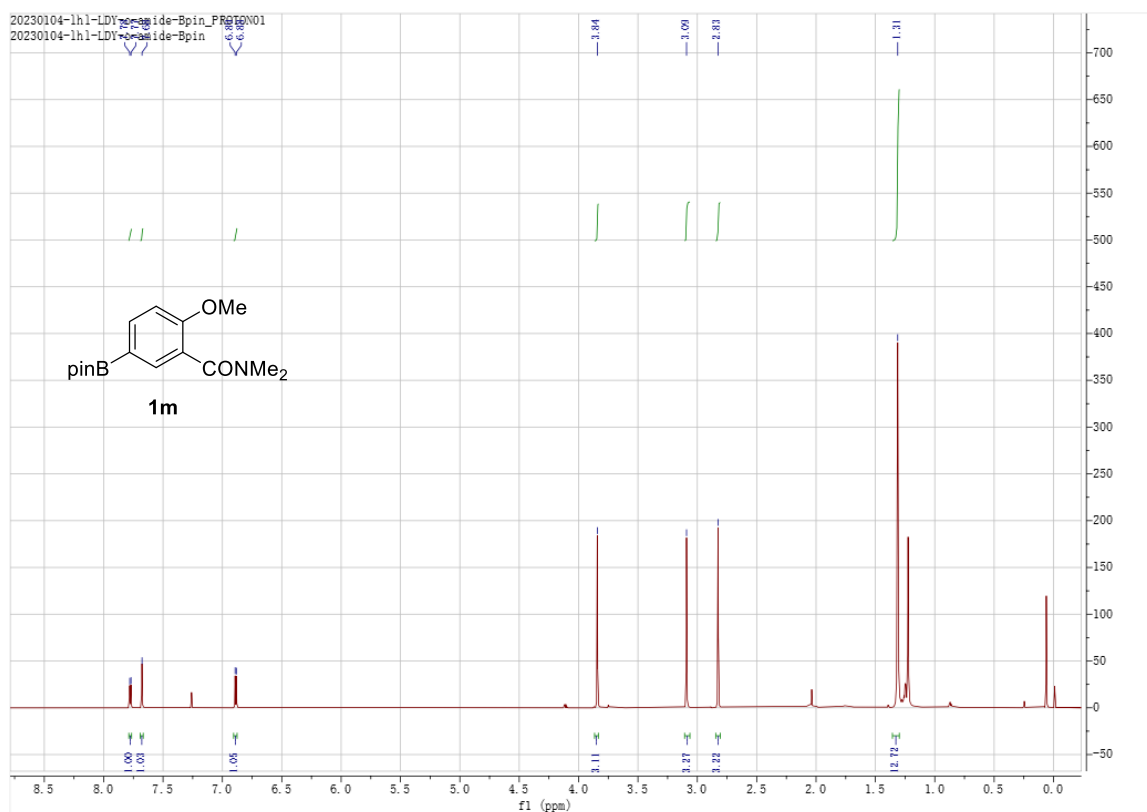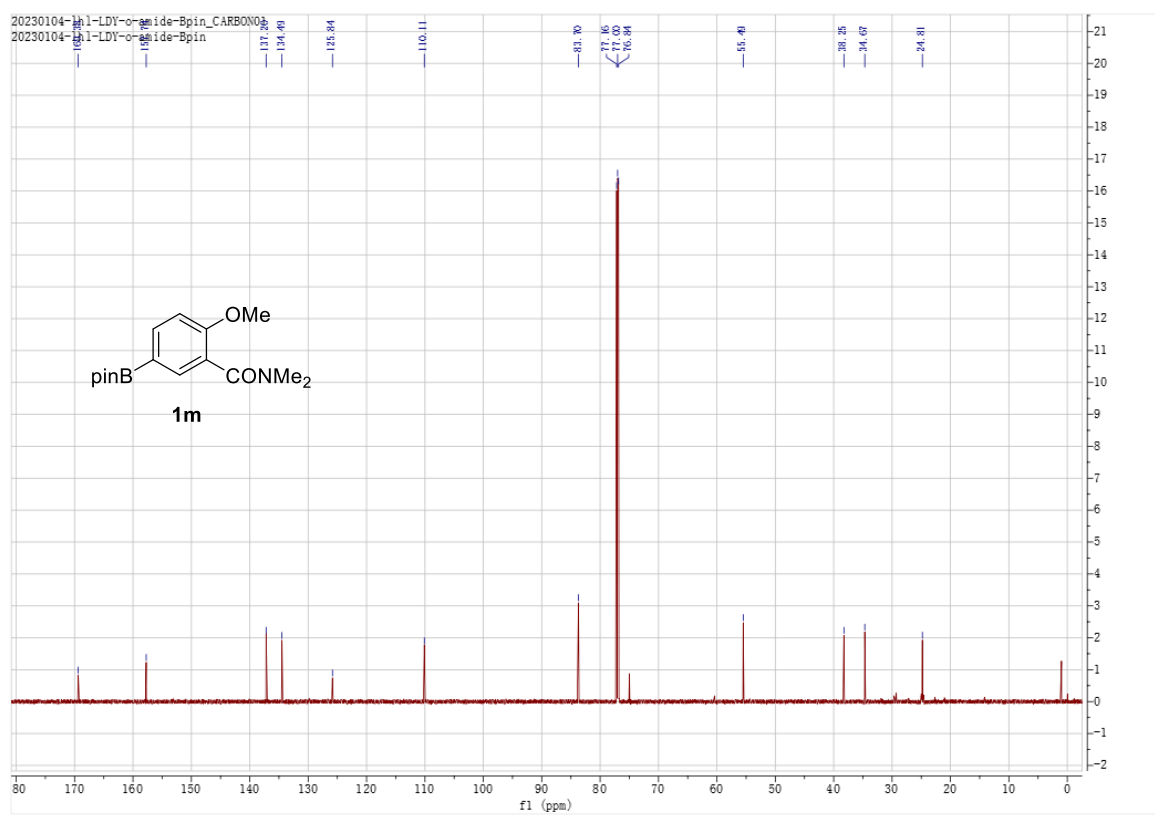

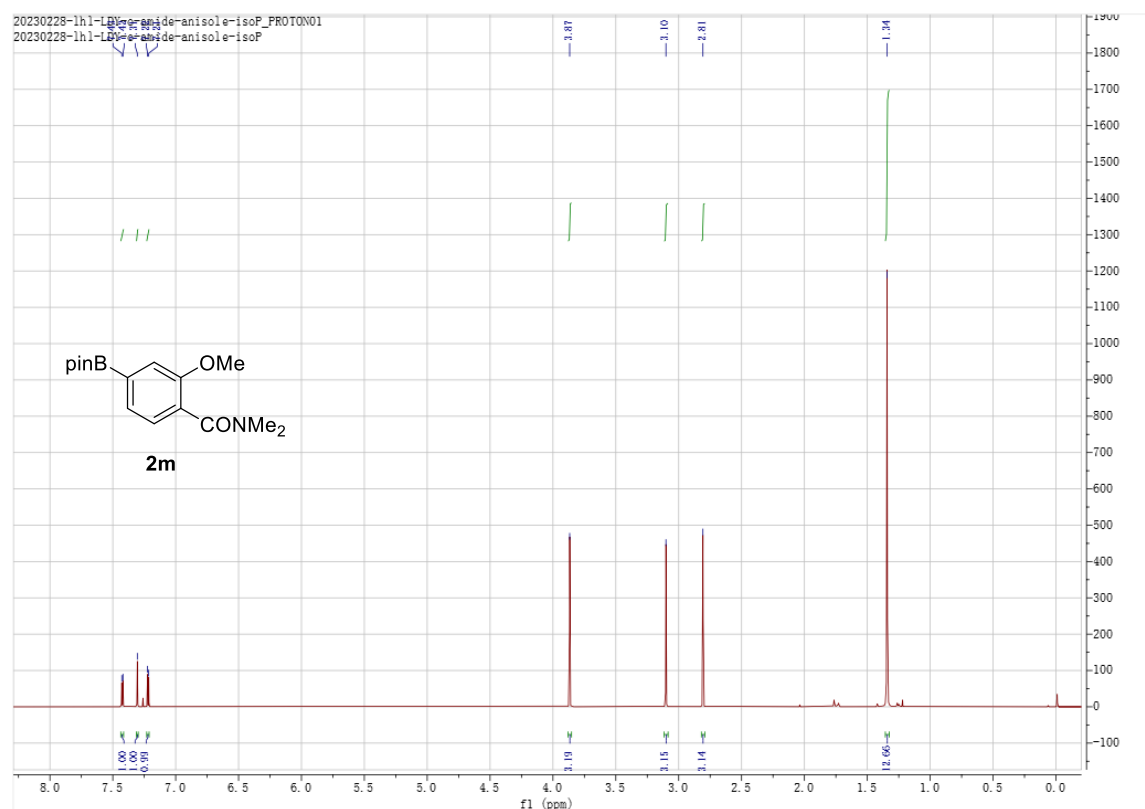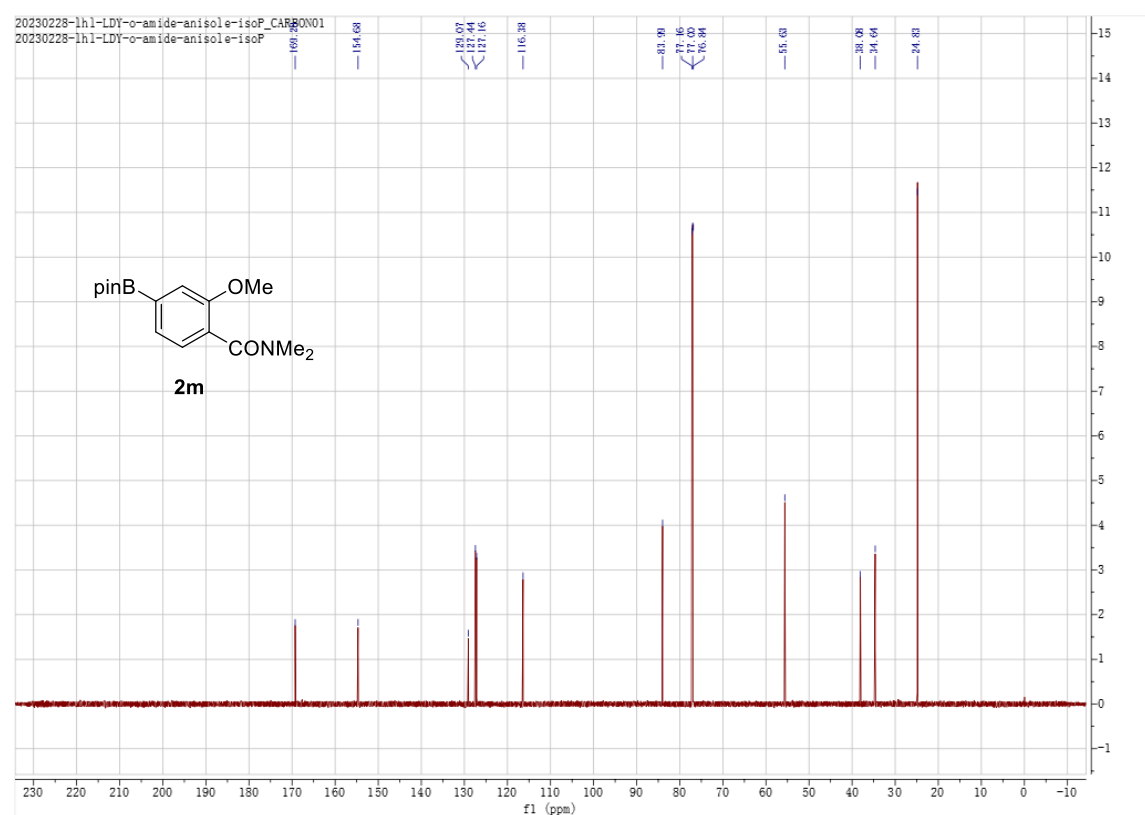

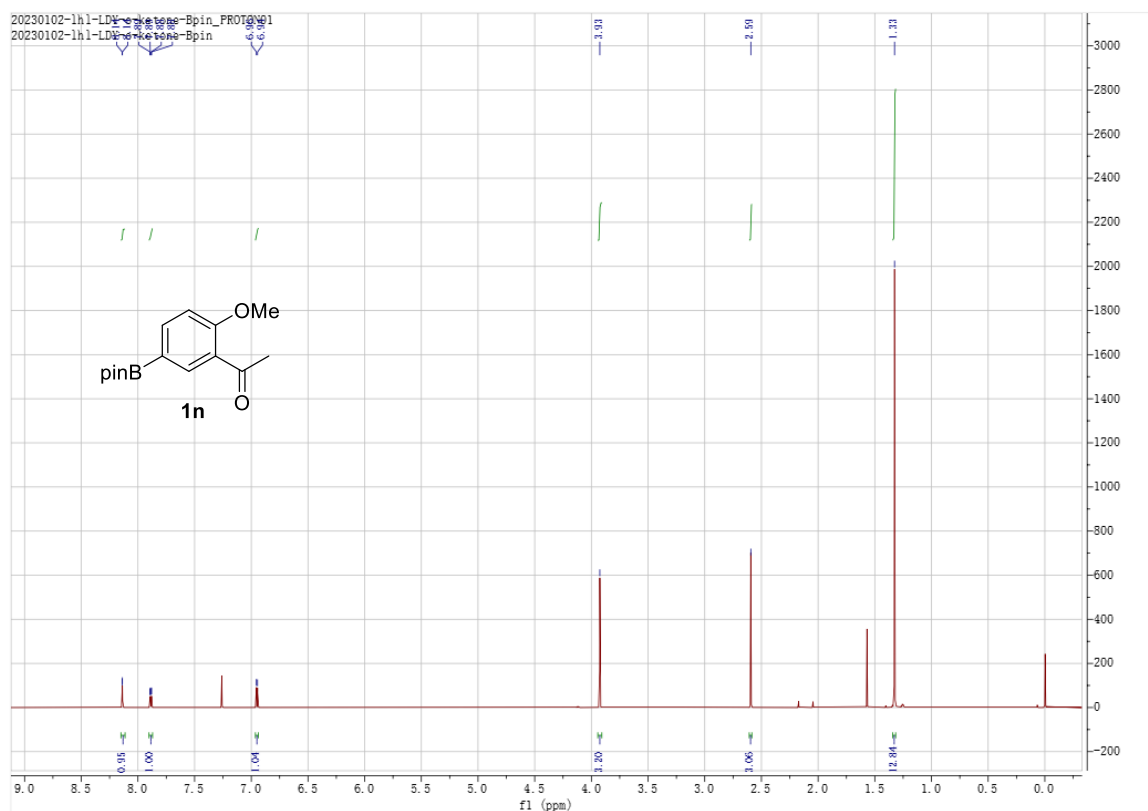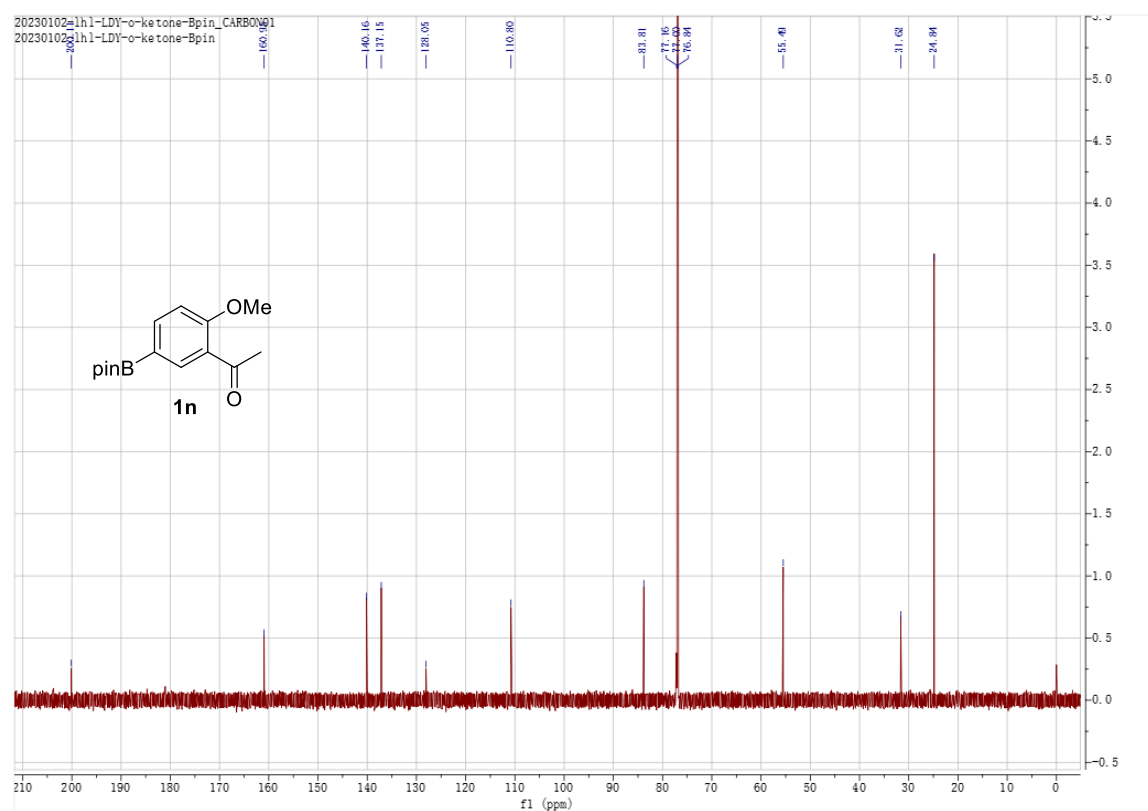

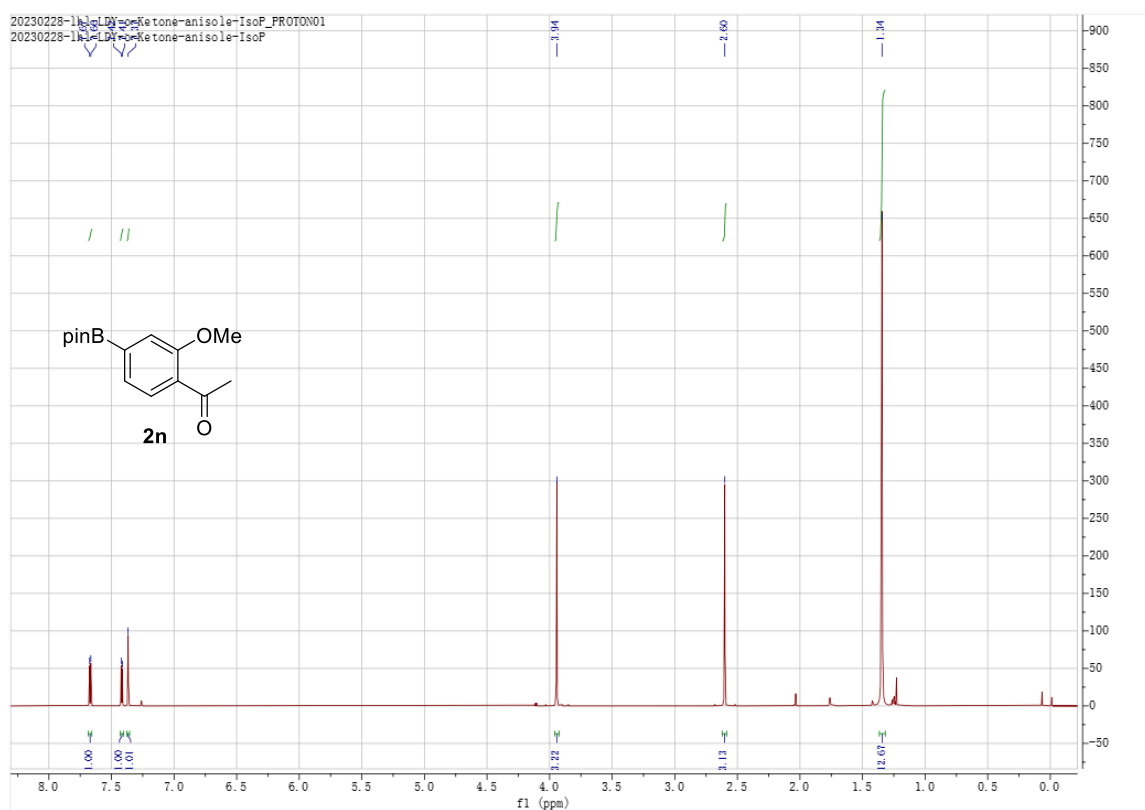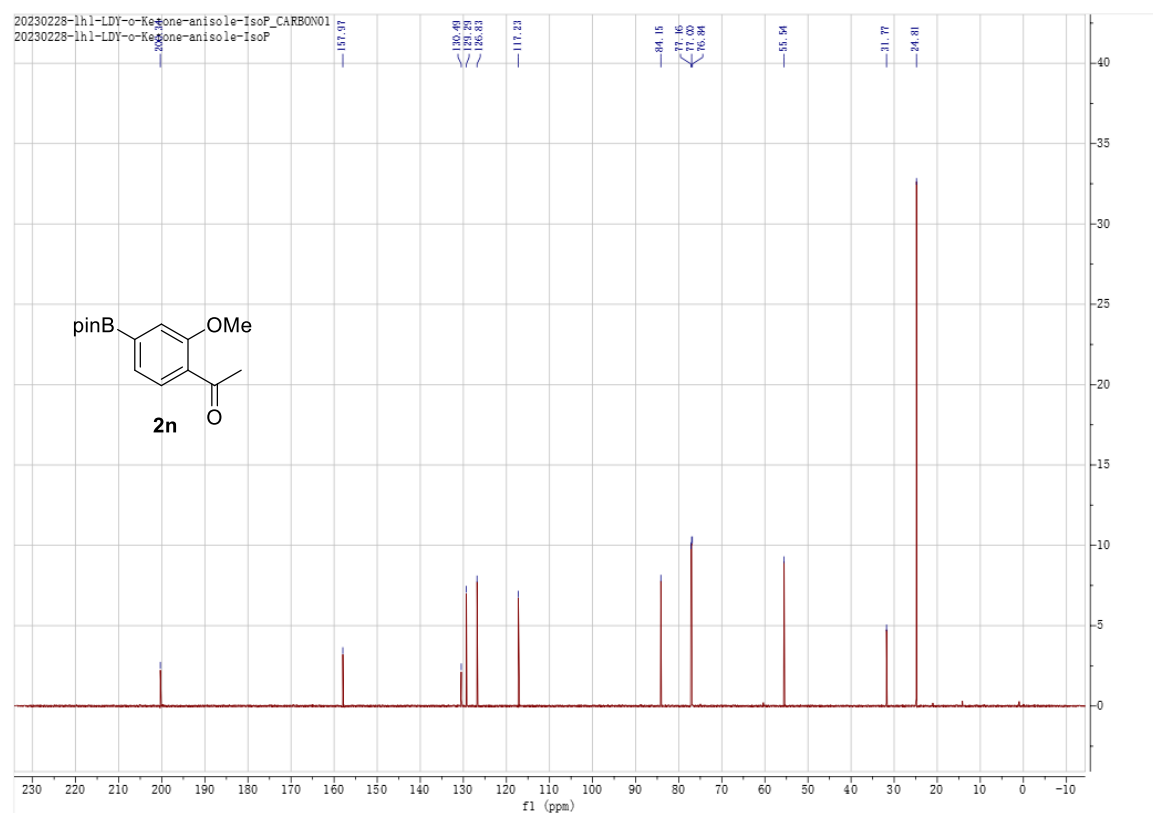

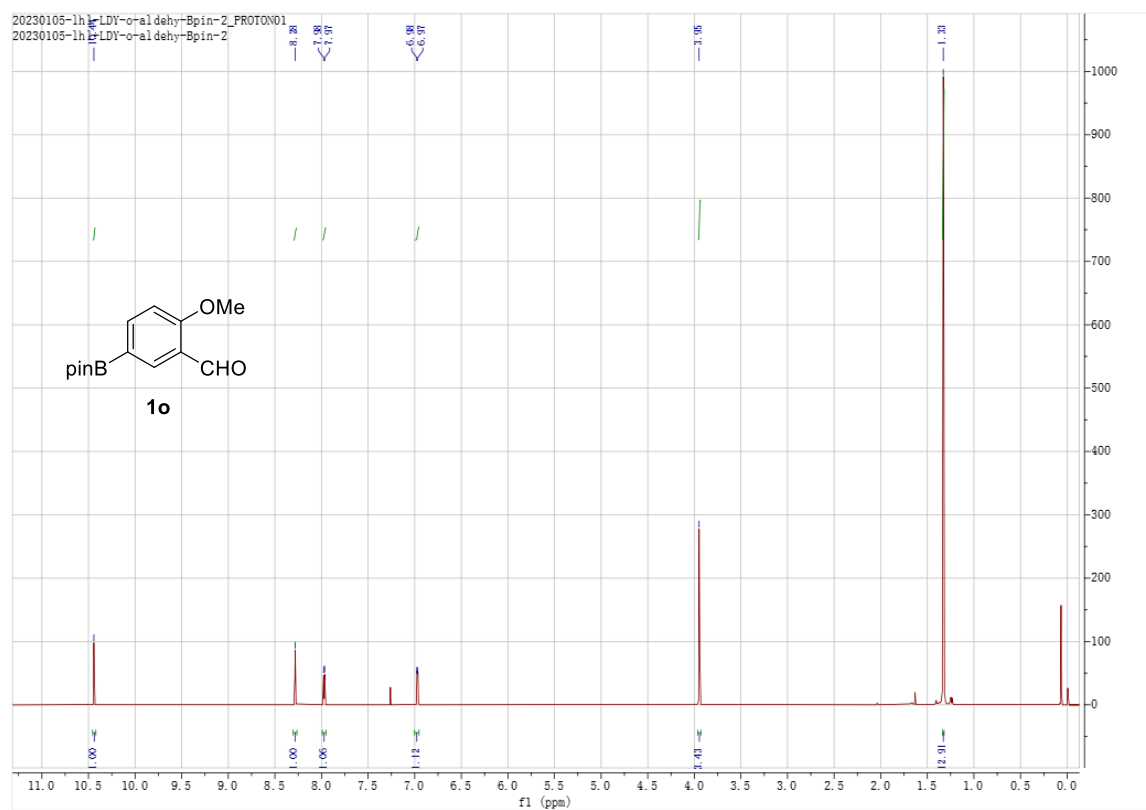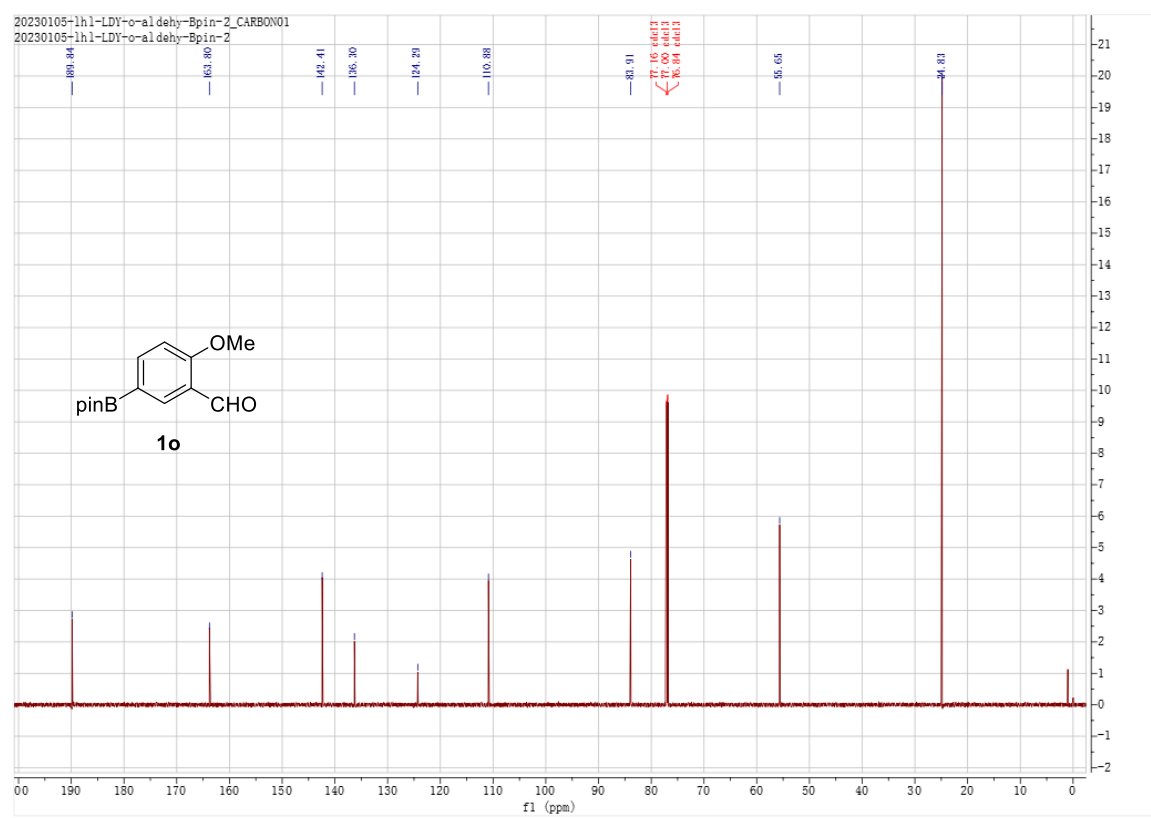

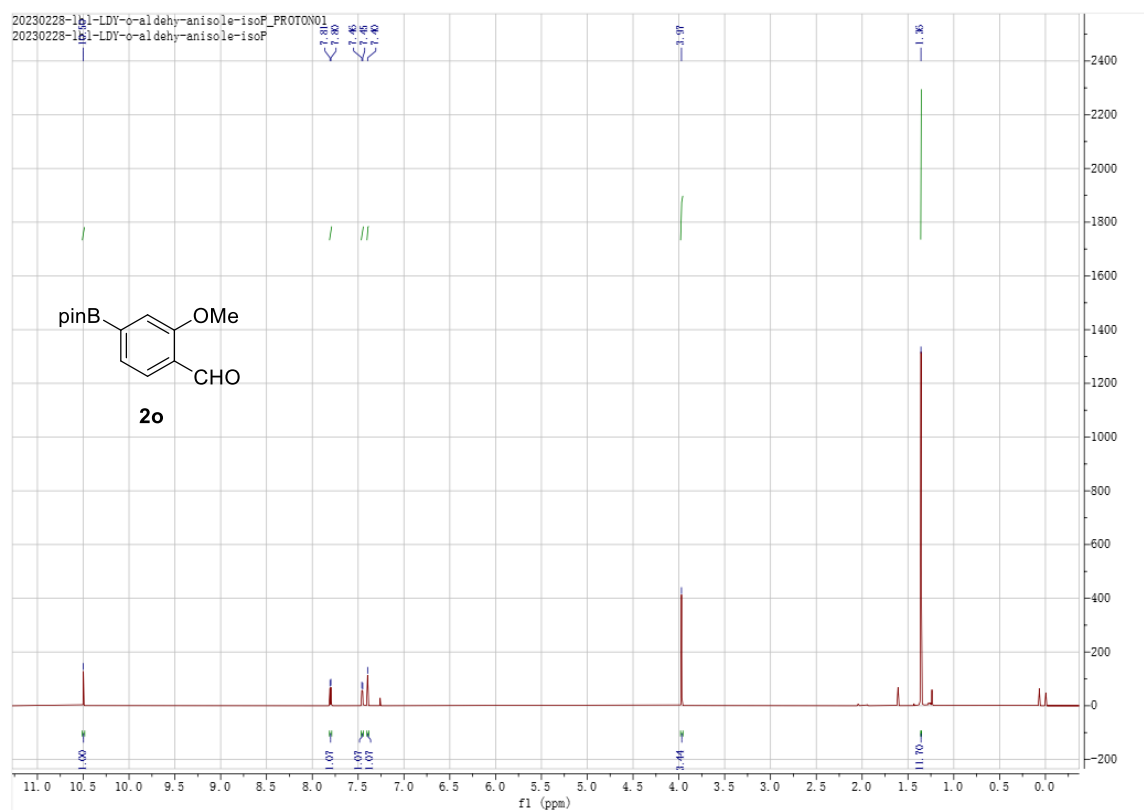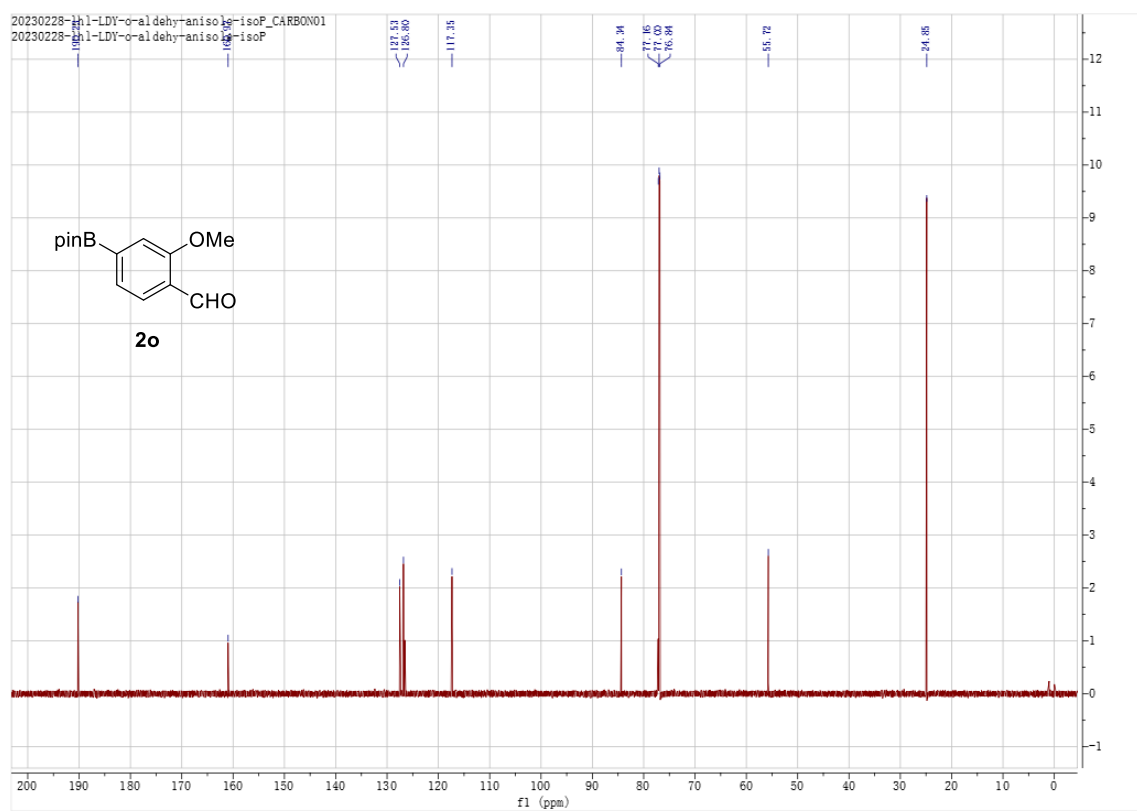

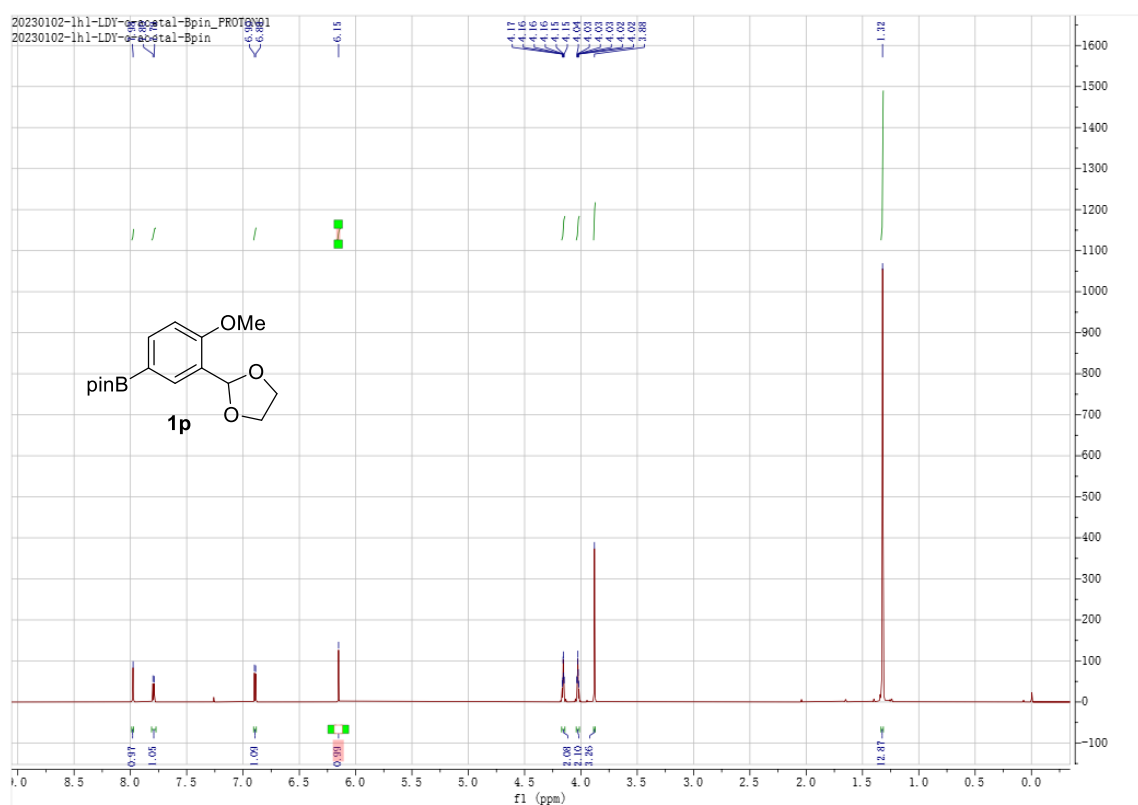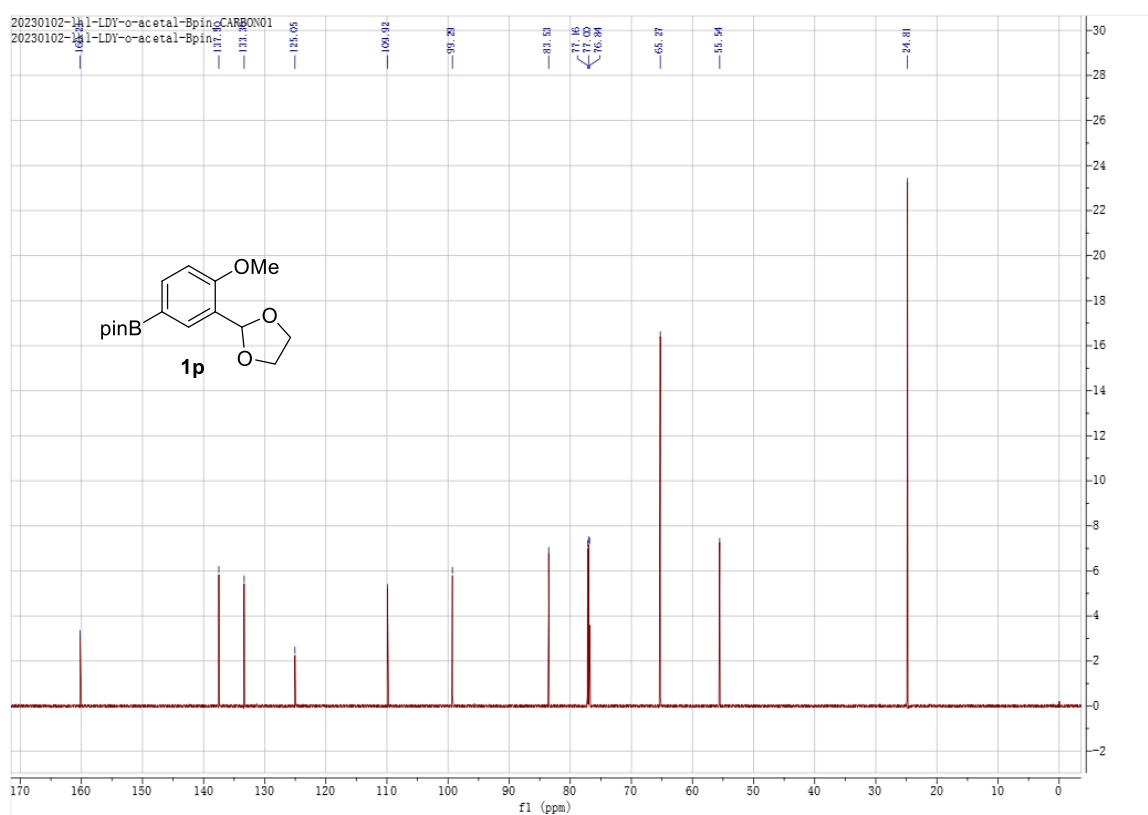

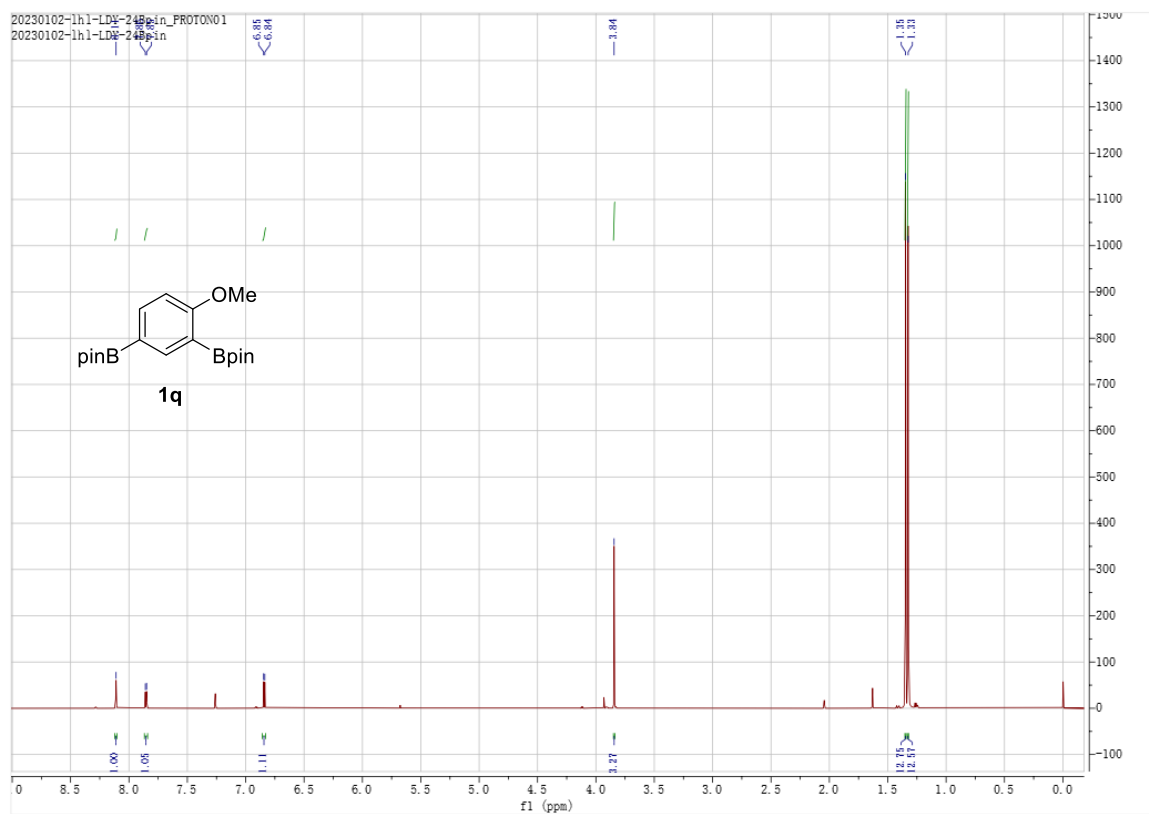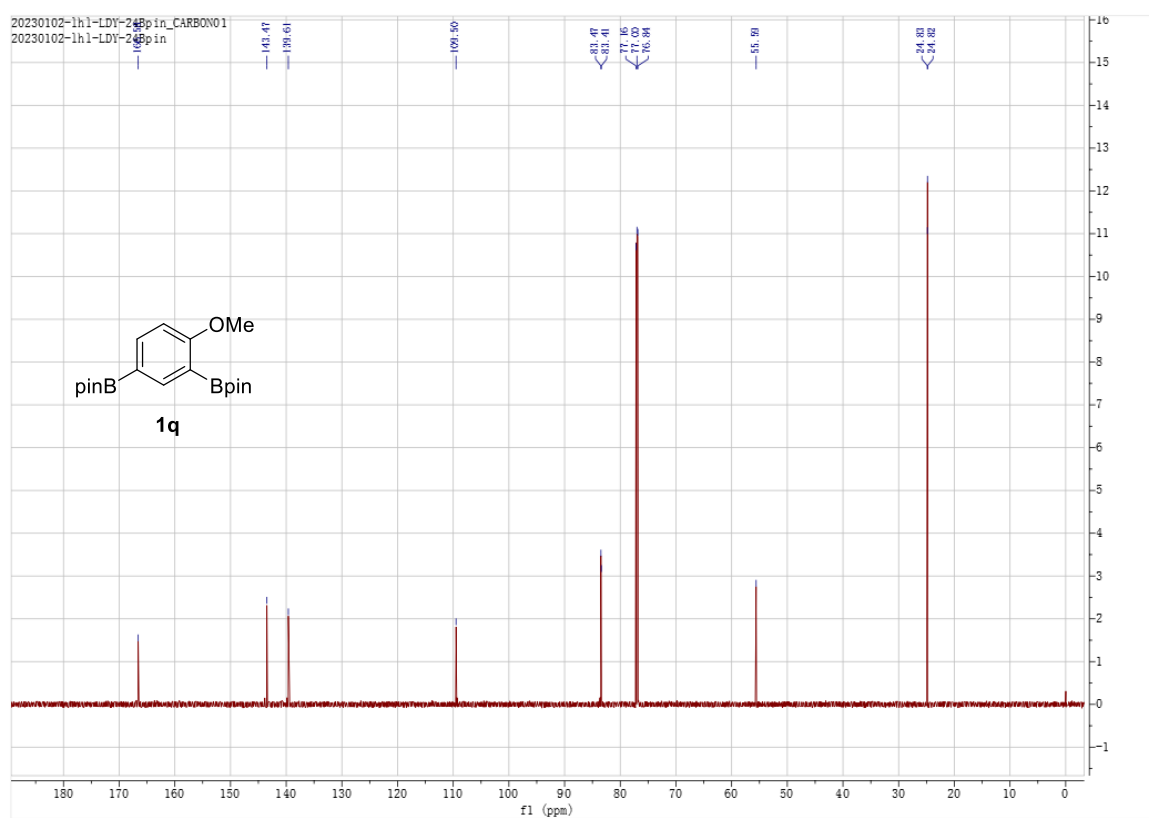

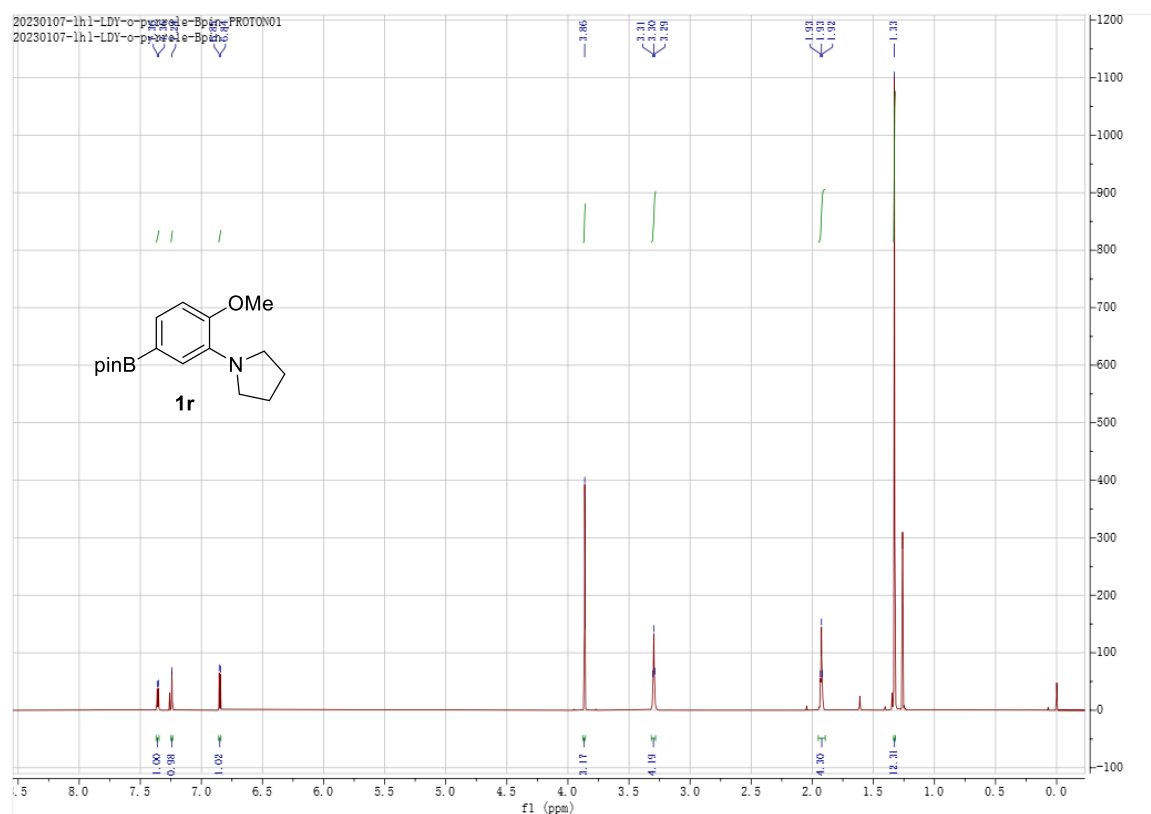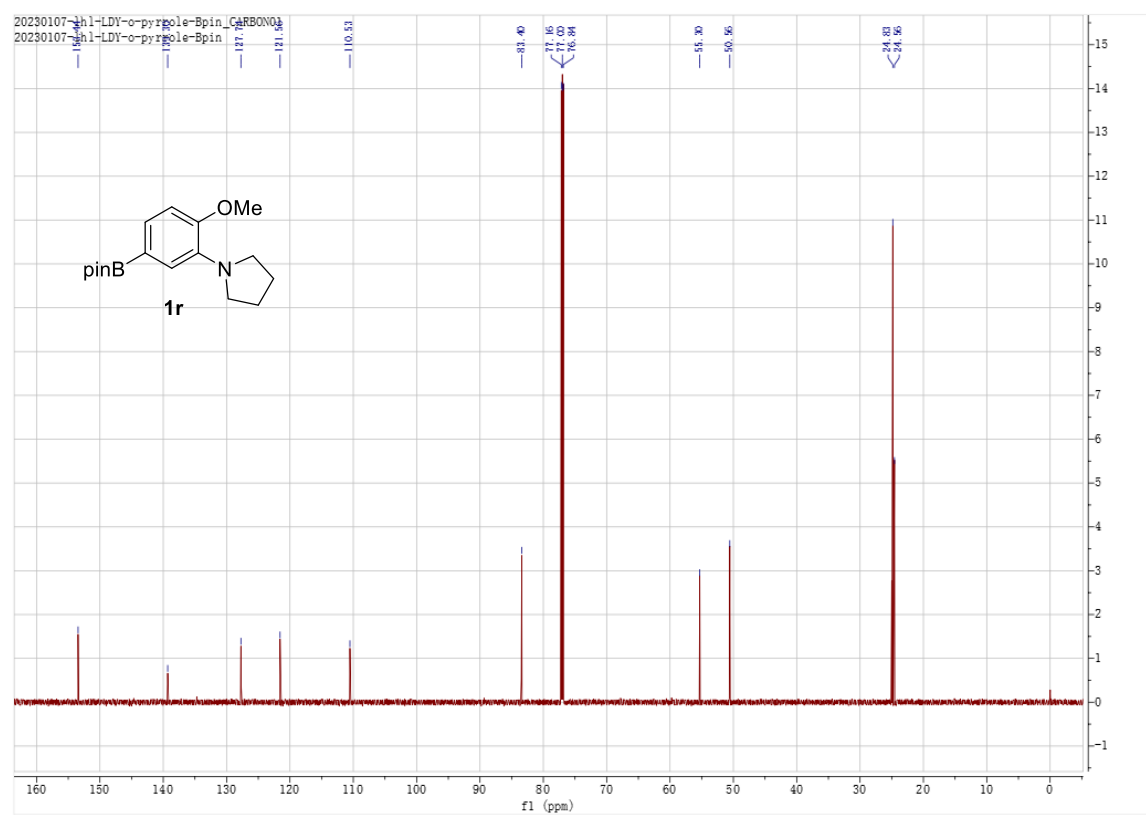

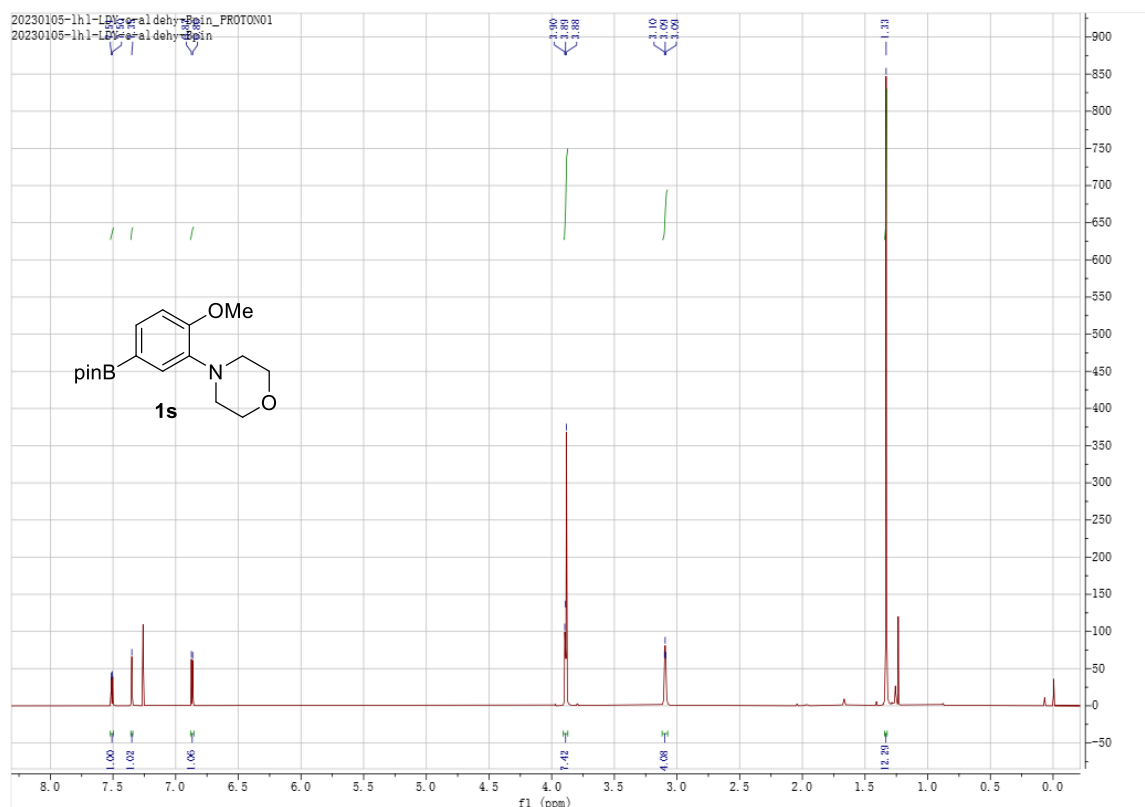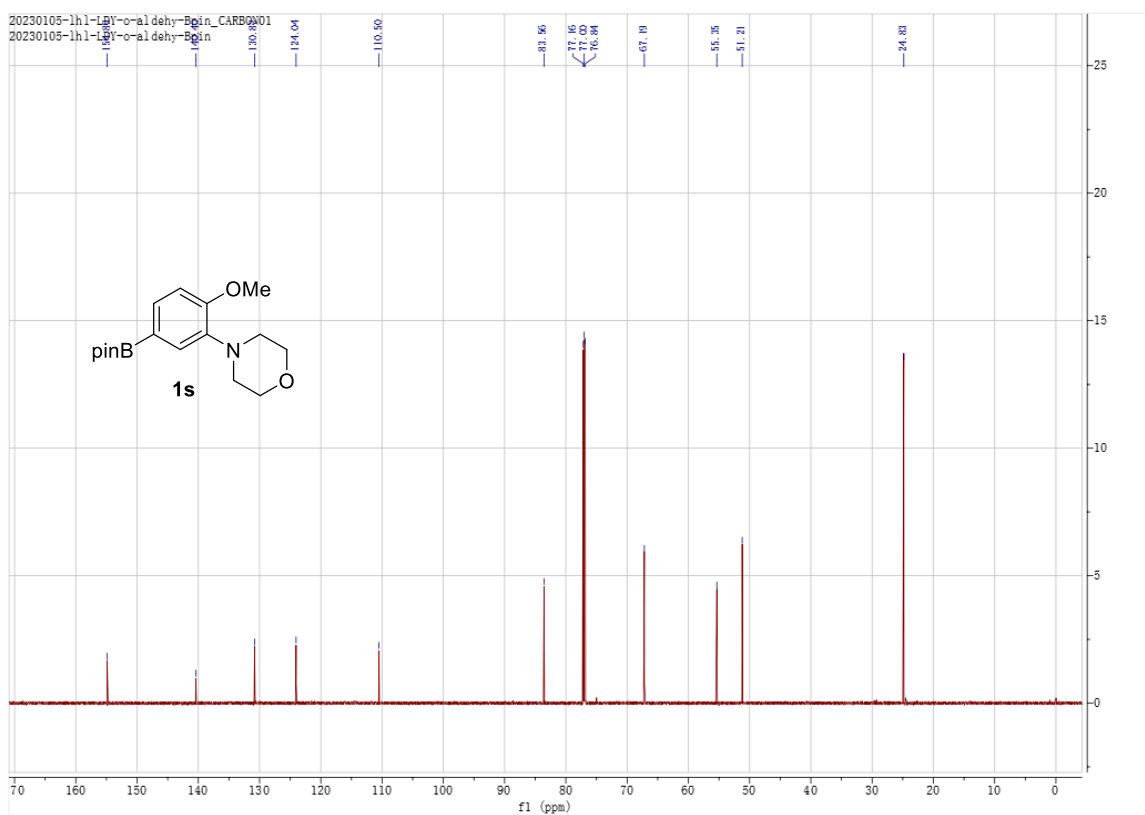

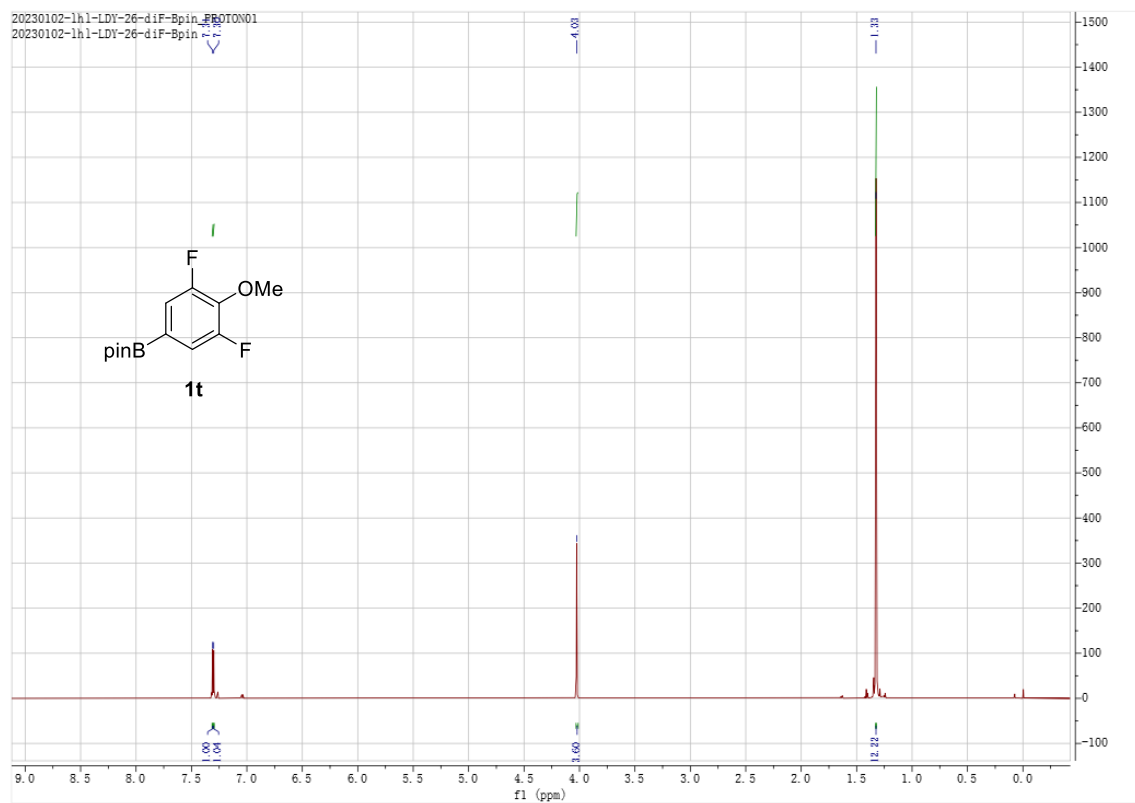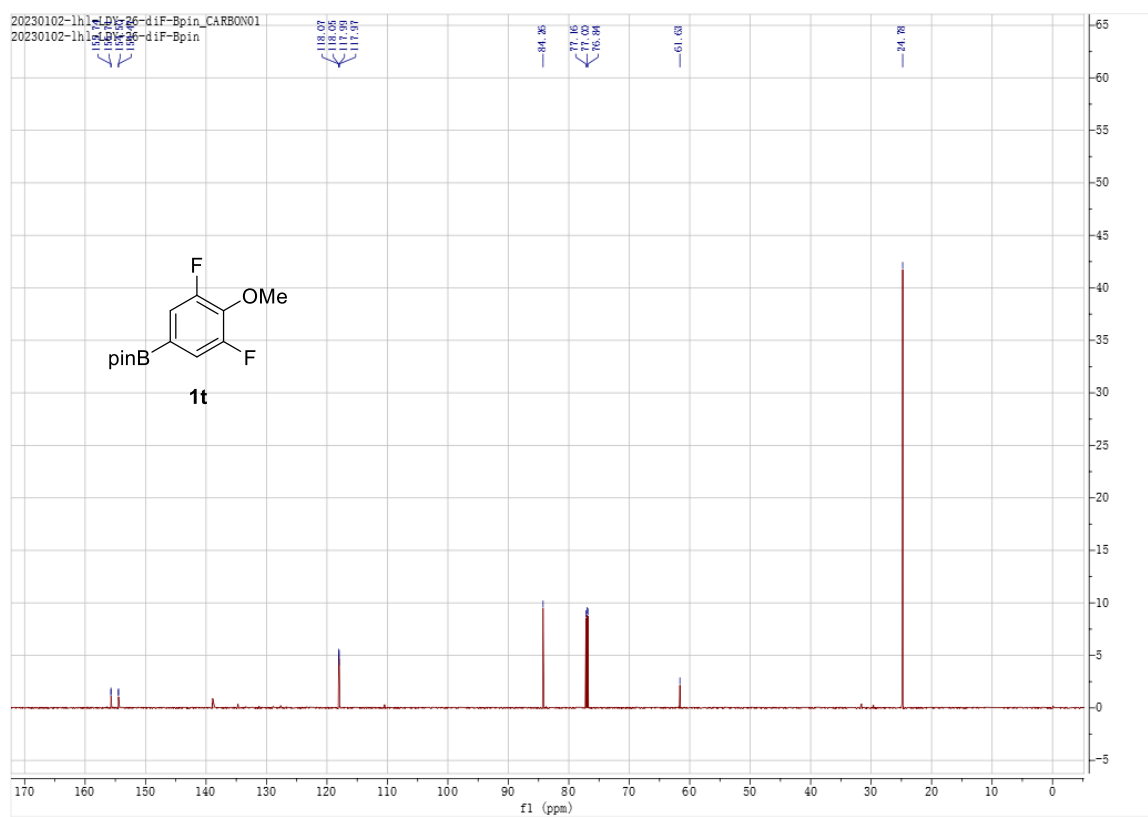

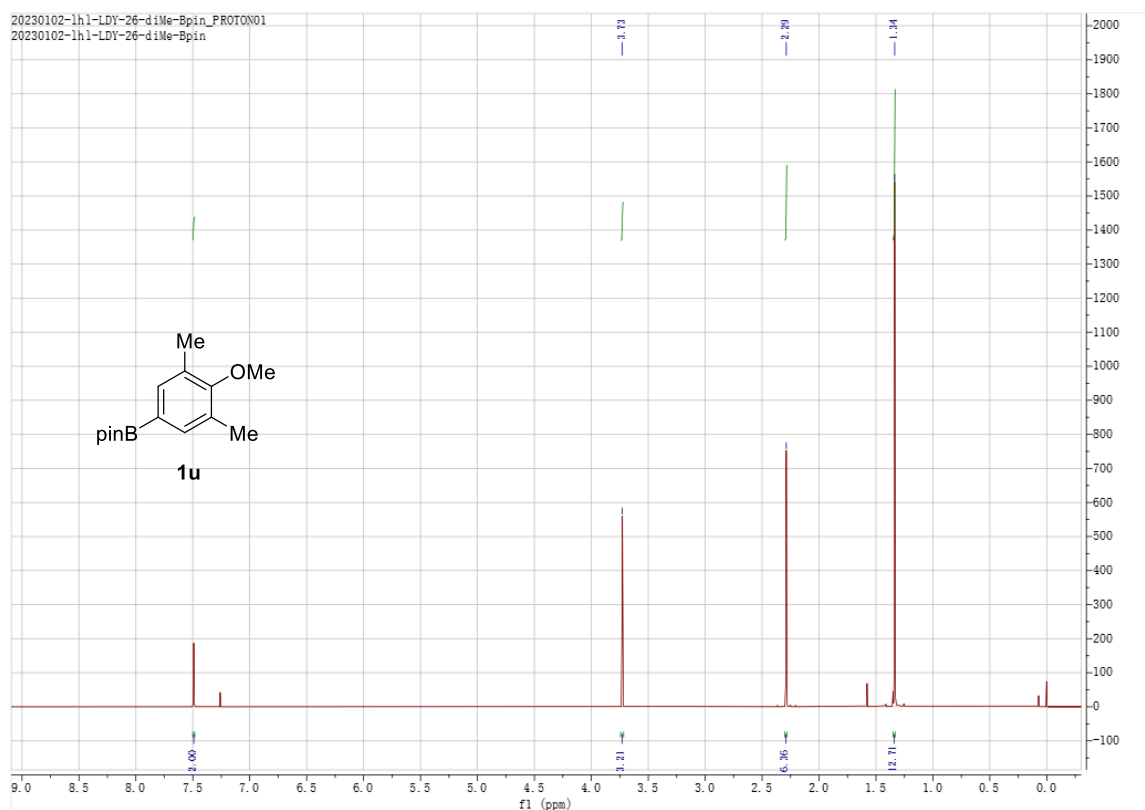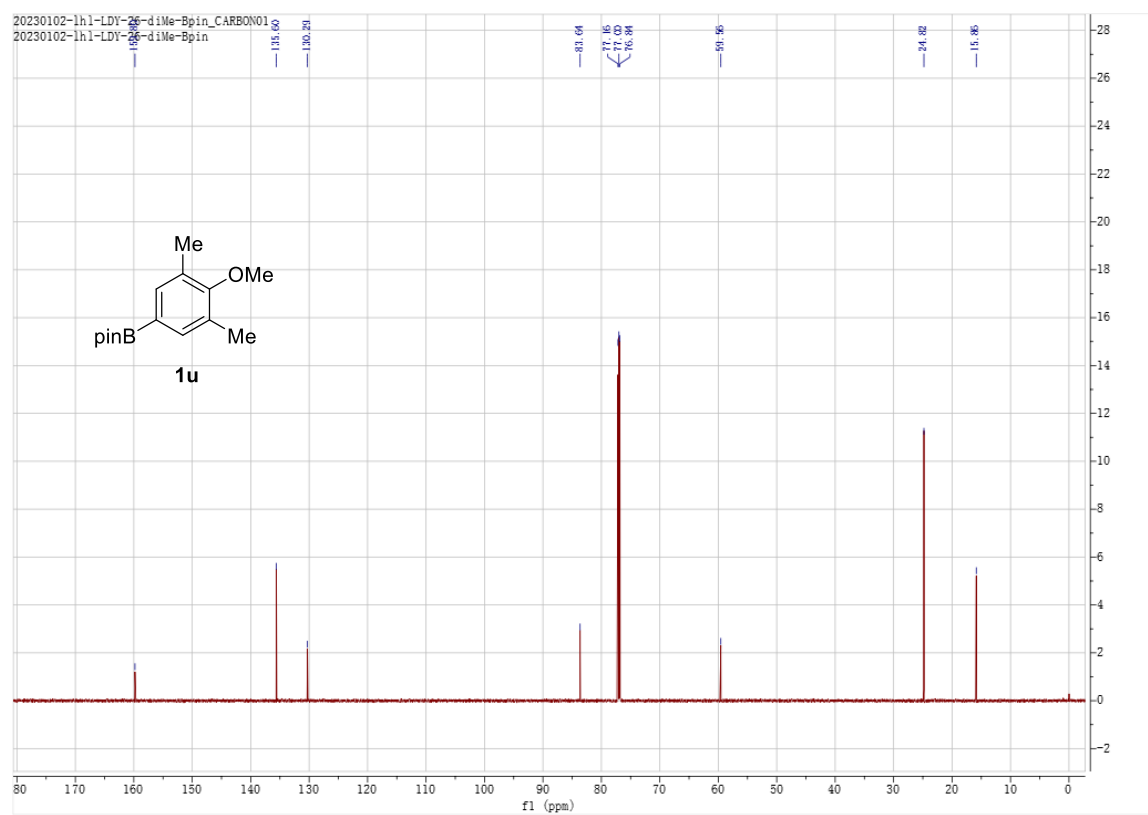

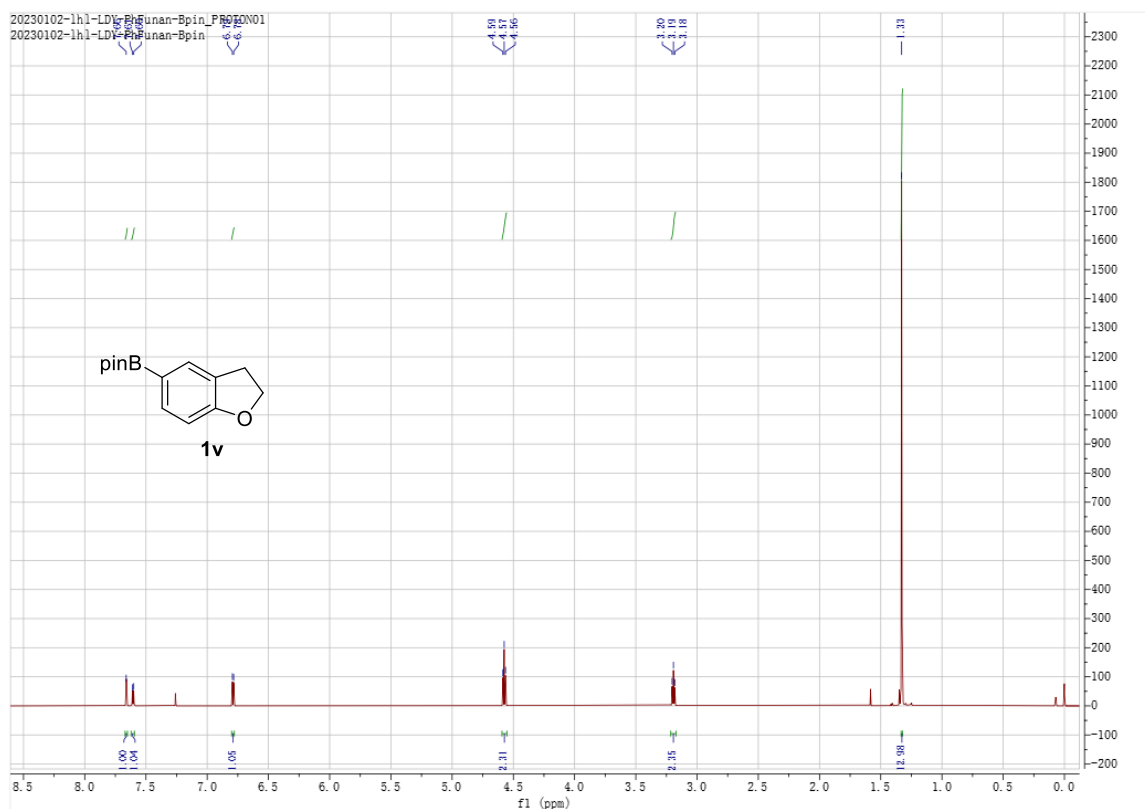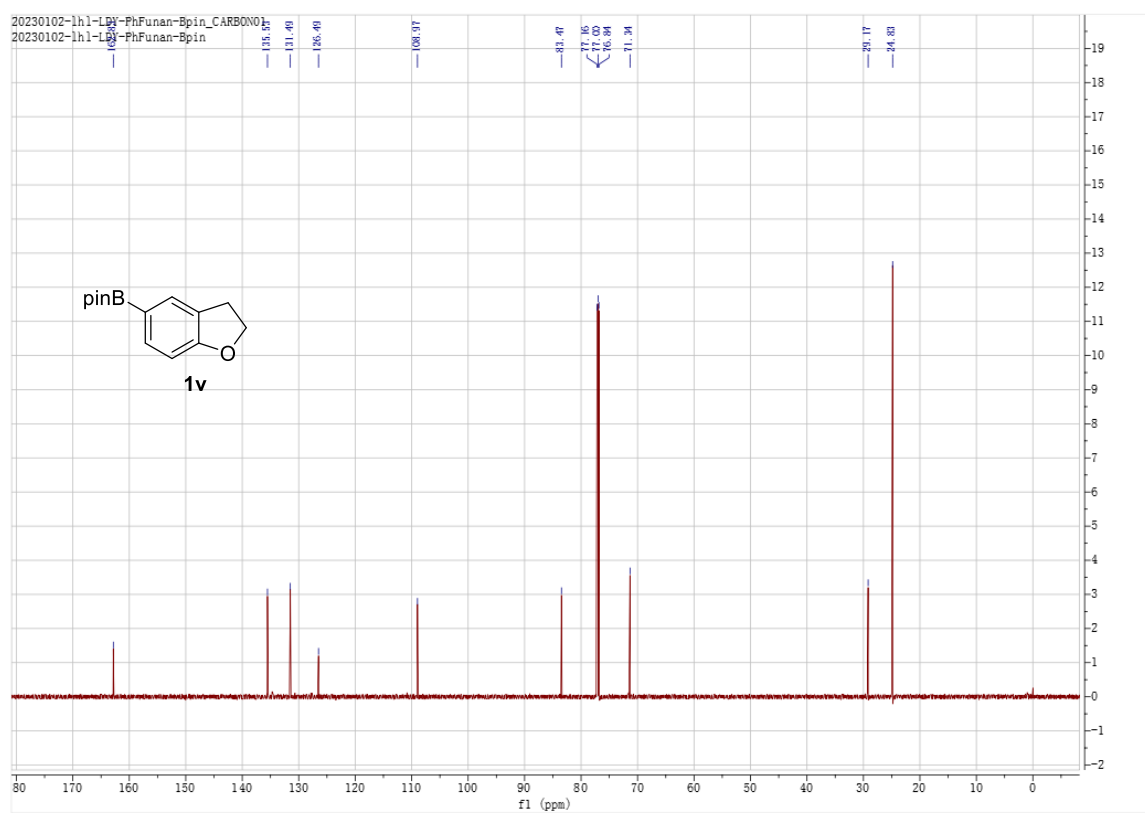

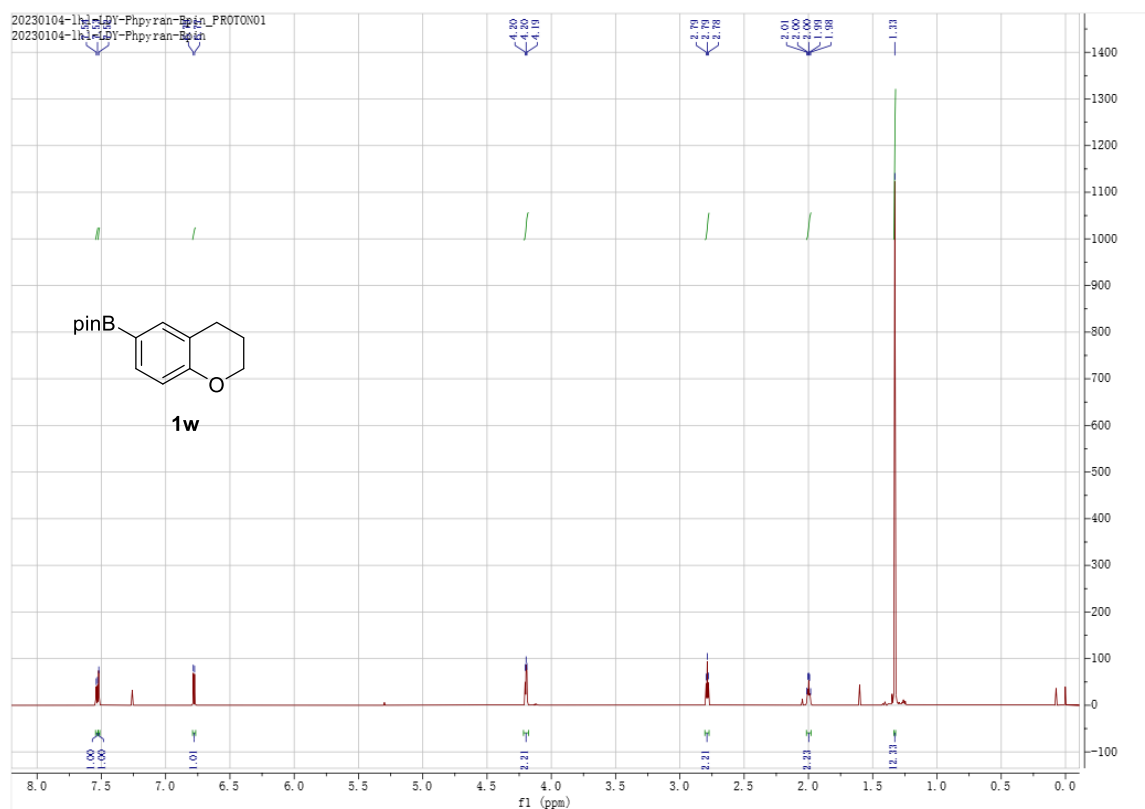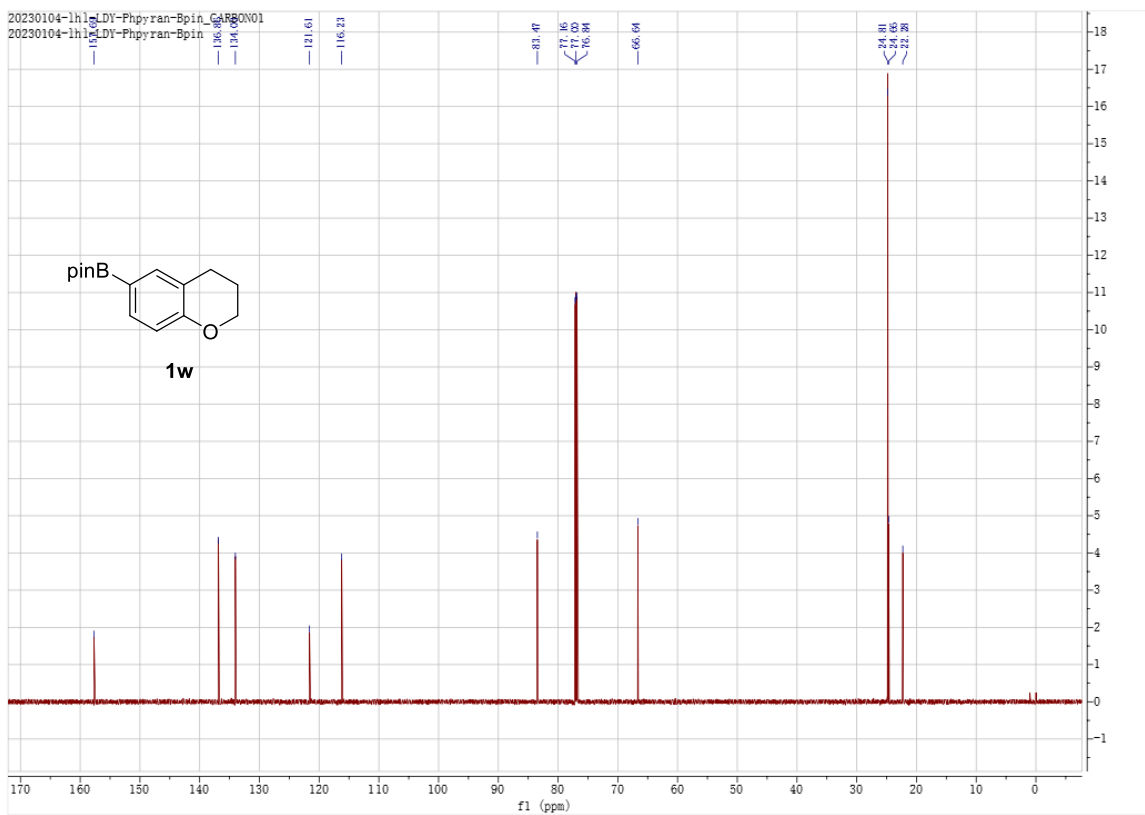

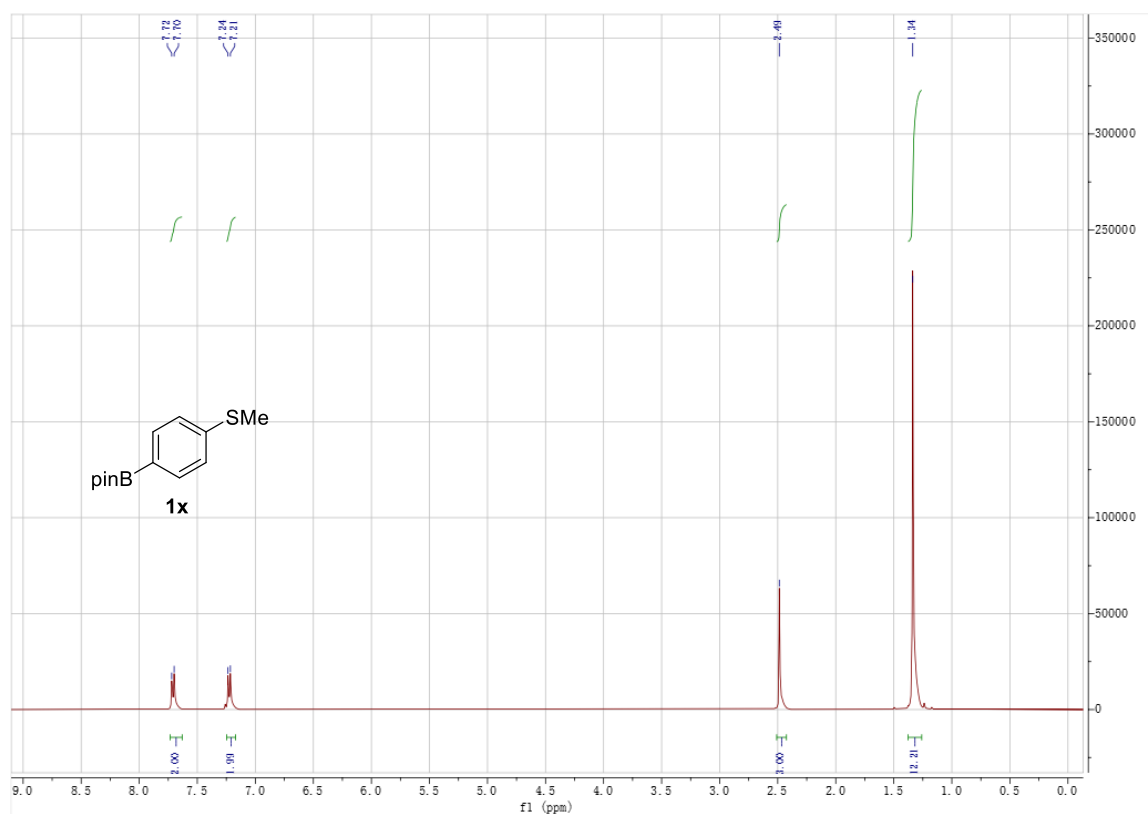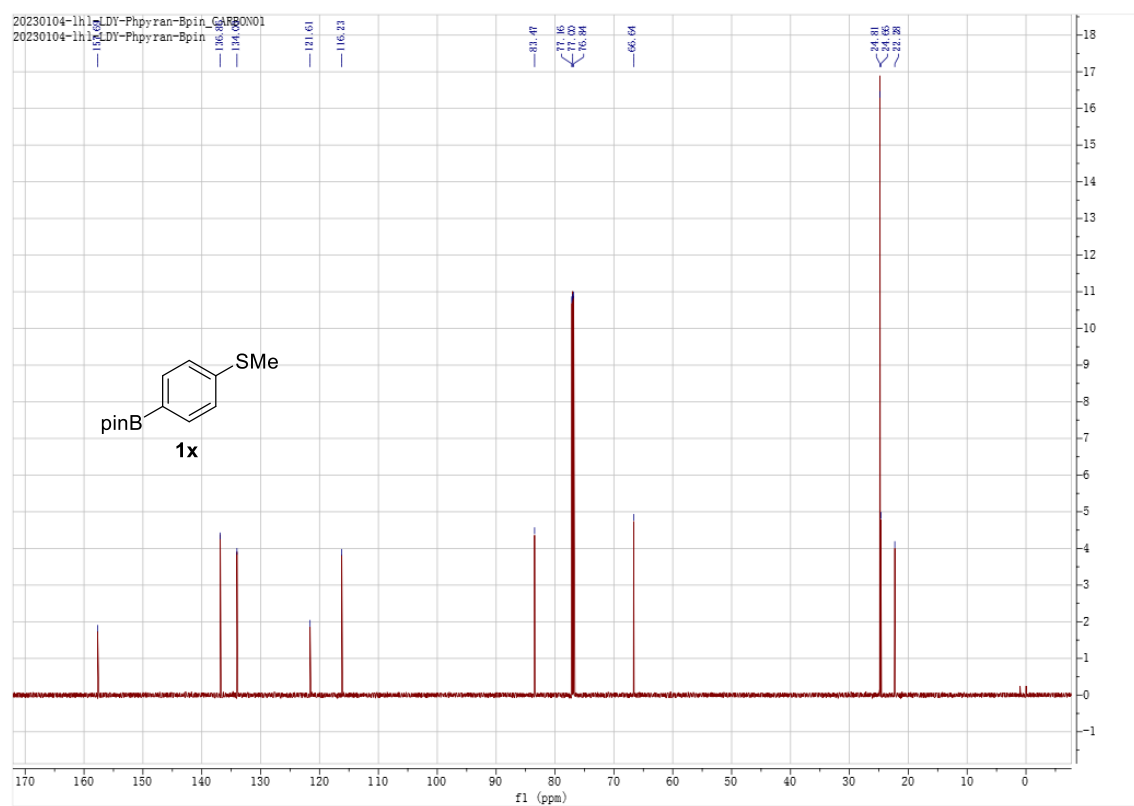

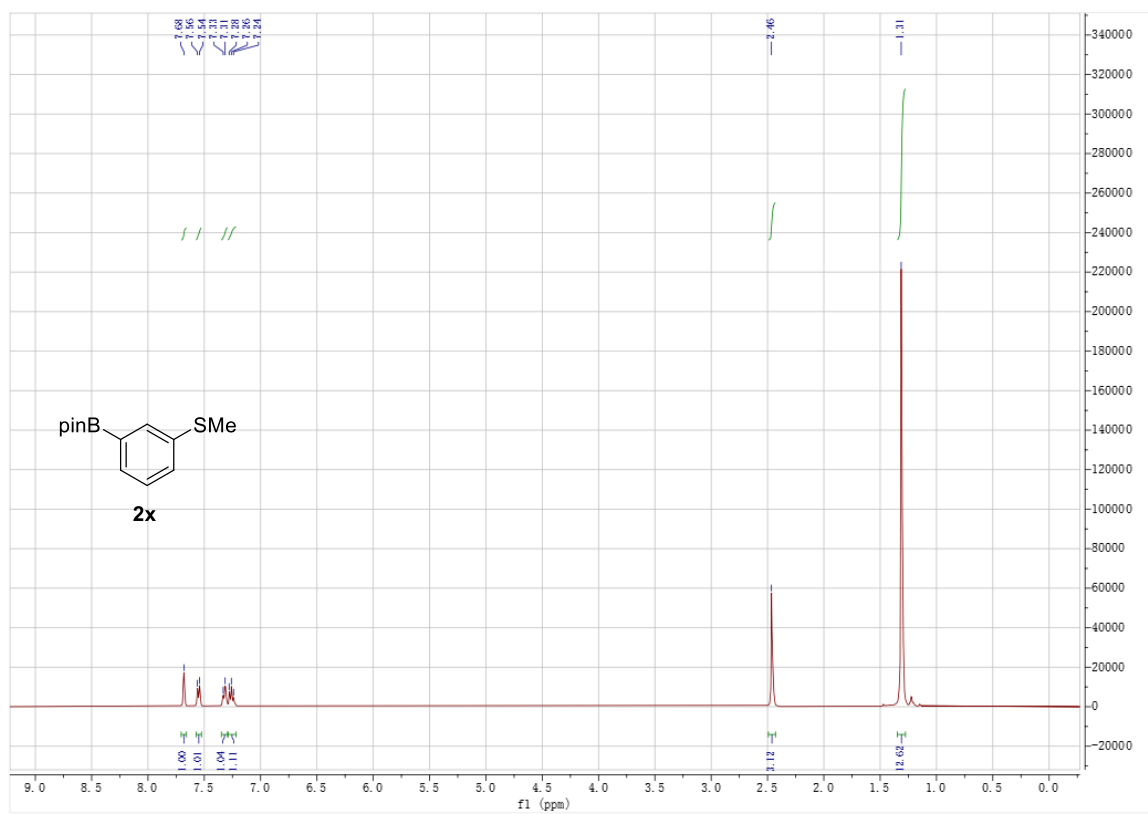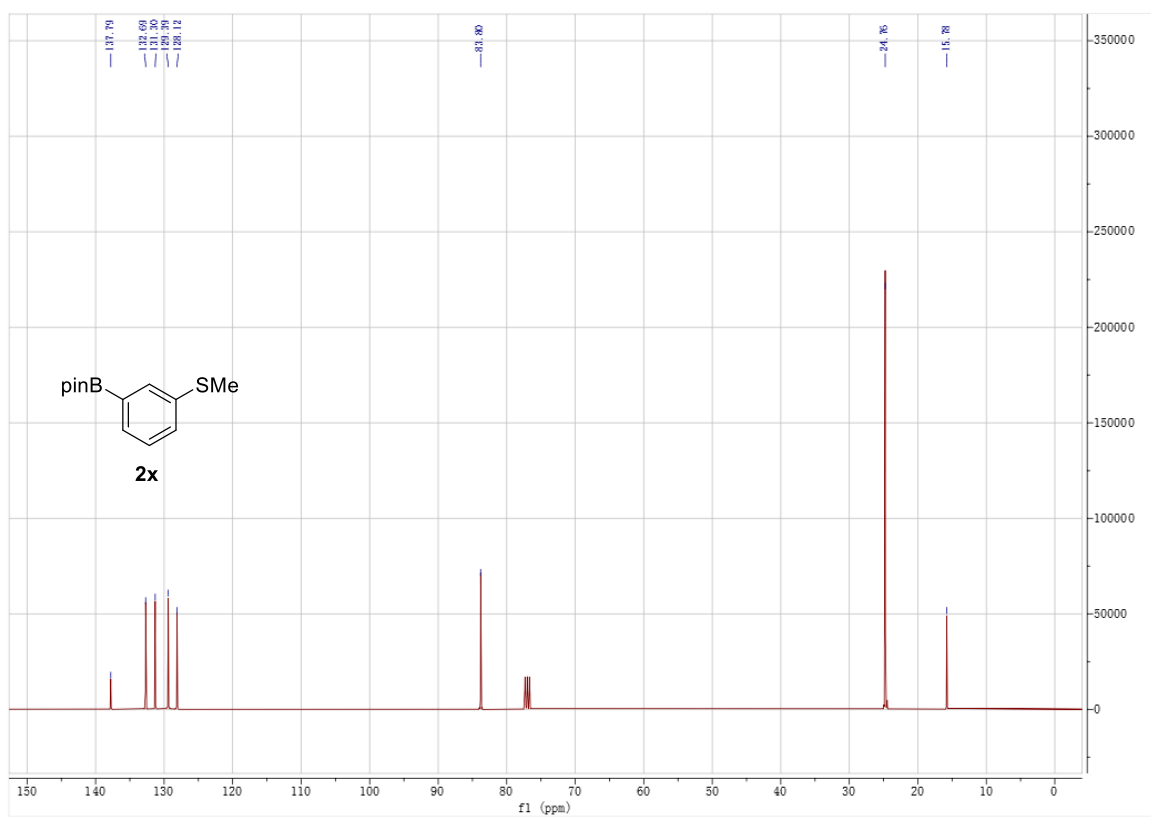

Supplement: s1 [file s1 › catalysts-2496097-supplementary.pdf]
