# Supplementary material for: The Improved para-Selective C(sp2)-H Borylation of Anisole Derivatives Enabled by Bulky Lewis Acid
Source: MDPI journal article supplement (doi:10.3390/catal13081193), 2023-08-09
Supplement: s1 [file s1]

Archive with 1 entries (1 files):
- catalysts-2496097-supplementary.pdf
